# Supplementary material for: Dicationic Bis-Pyridinium Hydrazone-Based Amphiphiles Encompassing Fluorinated Counteranions: Synthesis, Characterization, TGA-DSC, and DFT Investigations
Source: MDPI journal article supplement (doi:10.3390/molecules27082492), 2022-04-12
Supplement: s1 [file s1]

*Supplementary Materials*

**Dicationic Bis-Pyridinium Hydrazone-Based  
Amphiphiles Encompassing Fluorinated  
Counteranions: Synthesis, Characterization,  
TGA-DSC, and DFT Investigations**

Ateyatallah Aljuhani <sup>1</sup>, Nadjat Rezki <sup>1,\*</sup>, Salsabeel Al-Sodies <sup>1</sup>, Mouslim Messali <sup>1</sup>,  
Gamal M.S. ElShafei <sup>2</sup>, Mohamed Hagar <sup>3</sup> and Mohamed R. Aouad <sup>1,\*</sup>

## 1. Chemicals, reagents and instruments used:

All of the chemicals and solvents employed were of the greatest purity and analytical reagent grade, and none of them were refined any further. An uncorrected Stuart Scientific SMP1 apparatus was used to measure melting points (Stuart, Red Hill, UK). The NMR measurements were performed on a Bruker spectrometer (400 Brucker, Fällanden, Switzerland) with Tetramethylsilane (TMS) as an internal standard (0.00 ppm). For high resolution mass spectroscopy, an LCMS/MS impact II was used (HRMS). A TA Instruments SDT-Q600 was used to perform thermal gravimetric analysis (TGA). The DSC measurements of the examined substances were conducted using a Differential Scanning Calorimeter (DSC; MA, USA). The melting temperature, enthalpy, and lead were used to calibrate the DSC. DSC experiments were carried out with small samples (2-3 mg) placed in aluminum pans. All measurements were taken at a heating rate of 10 °C/min in a nitrogen gas inert atmosphere (30 ml/min), and all transitions were recorded from the second heating scan.

## 2. Spectroscopic characterization of the synthesized compounds 9-36

### *Characterization of 1-octyl-4-((2-(1-octylpyridin-1-ium-4-carbonyl)hydrazono)methyl)pyridin-1-ium iodide (9)*

It was obtained as yellow crystals in 88% yield; mp: 211-212 °C. FT-IR (KBr),  $\text{cm}^{-1}$ :  $\bar{\nu}$  = 1549 (C=C), 1638 (C=N), 1686 (C=O), 2848-2914 (Al-H).  $^1\text{H}$  NMR (400 MHz, DMSO- $d_6$ ):  $\delta_{\text{H}}$  = 0.85 (t, 6H,  $J$  = 8 Hz,  $2\times\text{CH}_3$ ), 1.25-1.29 (m, 20H,  $10\times\text{CH}_2$ ), 1.96 (bs, 4H,  $2\times\text{NCH}_2\text{CH}_2$ ), 4.60-4.72 (m, 4H,  $2\times\text{NCH}_2$ ), 8.20 (d, 0.5H,  $J$  = 8 Hz, Ar-H), 8.30 (s, 0.25H, H-C=N), 8.43 (d, 0.5H,  $J$  = 8 Hz, Ar-H), 8.46 (d, 1.5H,  $J$  = 8 Hz, Ar-H), 8.56 (d, 1.5H,  $J$  = 4 Hz, Ar-H), 8.64 (s, 0.75H, H-C=N), 9.04 (d, 0.5H,  $J$  = 8 Hz, Ar-H), 9.16 (d, 1.5H,  $J$  = 8 Hz, Ar-H), 9.28 (d, 0.5H,  $J$  = 4 Hz, Ar-H), 9.38 (d, 1.5H,  $J$  = 4 Hz, Ar-H), 13.20 (s, 1H, CONH).  $^{13}\text{C}$  NMR (100MHz, DMSO- $d_6$ ):  $\delta_{\text{C}}$  = 14.43 ( $2\times\text{CH}_3$ ), 22.52, 25.87, 28.82, 28.92, 31.15, 31.60 ( $12\times\text{CH}_2$ ), 60.96, 61.62 ( $2\times\text{NCH}_2$ ), 125.26, 125.42, 126.91, 127.74, 144.95, 145.37, 145.66, 146.33, 146.96, 149.14 (Ar-C), 160.32, 160.35 (C=N, C=O). HRMS (ESI)  $m/z$  = 706.1604 [ $\text{M}^+$ ].

**Characterization of 1-nonyl-4-((2-(1-nonylpyridin-1-ium-4-carbonyl)hydrazono)methyl)pyridin-1-ium iodide (10)**

It was obtained as yellow crystals in 85% yield; mp: 215-216 °C. FT-IR (KBr), cm<sup>-1</sup>:

$\bar{\nu}$  = 1553 (C=C), 1638 (C=N), 1694 (C=O), 2856-2927 (Al-H). <sup>1</sup>H NMR (400 MHz, DMSO-*d*<sub>6</sub>):  $\delta_{\text{H}}$  = 0.85 (t, 6H, *J* = 8 Hz, 2×CH<sub>3</sub>), 1.23-1.29 (m, 24H, 12×CH<sub>2</sub>), 1.95 (bs, 4H, 2×NCH<sub>2</sub>CH<sub>2</sub>), 4.59-4.70 (m, 4H, 2×NCH<sub>2</sub>), 8.17 (d, 0.5H, *J* = 4 Hz, Ar-H), 8.29 (s, 0.25H, H-C=N), 8.43 (d, 0.5H, *J* = 8 Hz, Ar-H), 8.45 (d, 1.5H, *J* = 4 Hz, Ar-H), 8.56 (d, 1.5H, *J* = 8 Hz, Ar-H), 8.63 (s, 0.75H, H-C=N), 9.02 (d, 0.5H, *J* = 8 Hz, Ar-H), 9.14 (d, 1.5H, *J* = 8 Hz, Ar-H), 9.26 (d, 0.5H, *J* = 4 Hz, Ar-H), 9.36 (d, 1.5H, *J* = 8 Hz, Ar-H), 13.18 (s, 1H, CONH). <sup>13</sup>C NMR (100 MHz, DMSO-*d*<sub>6</sub>):  $\delta_{\text{C}}$  = 14.44 (2×CH<sub>3</sub>), 22.57, 25.88, 25.91, 28.87, 29.18, 29.27, 29.39, 29.48, 29.53, 31.16, 31.76 (14×CH<sub>2</sub>), 61.67, 61.72 (2×NCH<sub>2</sub>), 125.26, 125.42, 126.91, 127.74, 144.95, 145.37, 145.66, 146.33, 146.96, 149.14 (Ar-C), 160.32, 160.35 (C=N, C=O). HRMS (ESI) *m/z* = 734.1917 [M<sup>+</sup>].

**Characterization of 1-decyl-4-((2-(1-decylpyridin-1-ium-4-carbonyl)hydrazono)methyl)pyridin-1-ium iodide (11)**

It was obtained as yellow crystals in 86% yield; mp: 217-218 °C. FT-IR (KBr), cm<sup>-1</sup>:

$\bar{\nu}$  = 1549 (C=C), 1639 (C=N), 1691 (C=O), 2849-2918 (Al-H). <sup>1</sup>H NMR (400 MHz, DMSO-*d*<sub>6</sub>):  $\delta_{\text{H}}$  = 0.84 (t, 6H, *J* = 4 Hz, 2×CH<sub>3</sub>), 1.24-1.29 (m, 28H, 14×CH<sub>2</sub>), 1.95 (bs, 4H, 2×NCH<sub>2</sub>CH<sub>2</sub>), 4.59-4.71 (m, 4H, 2×NCH<sub>2</sub>), 8.19 (d, 0.5H, *J* = 4 Hz, Ar-H), 8.30 (s, 0.25H, H-C=N), 8.43 (d, 0.5H, *J* = 8 Hz, Ar-H), 8.46 (d, 1.5H, *J* = 4 Hz, Ar-H), 8.56 (d, 1.5H, *J* = 4 Hz, Ar-H), 8.63 (s, 0.75H, H-C=N), 9.02 (d, 0.5H, *J* = 4 Hz, Ar-H), 9.15 (d, 1.5H, *J* = 4 Hz, Ar-H), 9.28 (d, 0.5H, *J* = 4 Hz, Ar-H), 9.37 (d, 1.5H, *J* = 4 Hz, Ar-H), 13.20 (s, 1H, CONH). <sup>13</sup>C NMR (100 MHz, DMSO-*d*<sub>6</sub>):  $\delta_{\text{C}}$  = 14.45 (2×CH<sub>3</sub>), 22.57, 25.87, 25.91, 28.86, 29.13, 29.27, 29.35, 29.48, 31.15, 31.75 (16×CH<sub>2</sub>), 60.95, 61.62 (2×NCH<sub>2</sub>), 125.26, 125.42, 126.91, 127.74, 144.95, 145.37, 145.66, 146.33, 146.96, 149.14 (Ar-C), 160.25, 160.33 (C=N, C=O). HRMS (ESI) *m/z* = 762.2230 [M<sup>+</sup>].

**Characterization of 1-dodecyl-4-((2-(1-dodecylpyridin-1-ium-4-carbonyl)hydrazono)methyl)pyridin-1-ium iodide (12)**

It was obtained as yellow crystals in 88% yield; mp: 209-210 °C. FT-IR (KBr), cm<sup>-1</sup>:

$\bar{\nu}$  = 1547 (C=C), 1640 (C=N), 1689 (C=O), 2842-2917 (Al-H). <sup>1</sup>H NMR (400 MHz,

DMSO-*d*<sub>6</sub>):  $\delta_{\text{H}}$  = 0.84 (t, 6H,  $J$  = 4 Hz, 2×CH<sub>3</sub>), 1.23-1.29 (m, 36H, 18×CH<sub>2</sub>), 1.95 (bs, 4H, 2×NCH<sub>2</sub>CH<sub>2</sub>), 4.59-4.71 (m, 4H, 2×NCH<sub>2</sub>), 8.18 (d, 0.5H,  $J$  = 4 Hz, Ar-H), 8.30 (s, 0.25H, H-C=N), 8.43 (d, 0.5H,  $J$  = 8 Hz, Ar-H), 8.45 (d, 1.5H,  $J$  = 4 Hz, Ar-H), 8.56 (d, 1.5H,  $J$  = 4 Hz, Ar-H), 8.63 (s, 0.75H, H-C=N), 9.03 (d, 0.5H,  $J$  = 8 Hz, Ar-H), 9.15 (d, 1.5H,  $J$  = 8 Hz, Ar-H), 9.28 (d, 0.5H,  $J$  = 4 Hz, Ar-H), 9.37 (d, 1.5H,  $J$  = 4 Hz, Ar-H), 13.20 (s, 1H, CONH). <sup>13</sup>C NMR (100 MHz, DMSO-*d*<sub>6</sub>):  $\delta_{\text{C}}$  = 14.44 (2×CH<sub>3</sub>), 22.57, 25.86, 29.19, 29.27, 29.38, 29.39, 29.48, 31.15, 31.76 (20×CH<sub>2</sub>), 60.95, 61.62 (2×NCH<sub>2</sub>), 125.26, 125.42, 126.91, 127.74, 144.93, 145.37, 145.66, 146.35, 146.96, 149.17 (Ar-C), 160.25, 160.33 (C=N, C=O). HRMS (ESI)  $m/z$  = 818.2856 [M<sup>+</sup>].

***Characterization of 1-tetradecyl-4-((2-(1-tetradecylpyridin-1-ium-4-carbonyl)hydrazono)methyl)pyridin-1-ium iodide (13)***

It was obtained as yellow crystals in 87% yield; mp: 194-195 °C. FT-IR (KBr), cm<sup>-1</sup>:

$\bar{\nu}$  = 1552 (C=C), 1642 (C=N), 1695 (C=O), 2847-2919 (Al-H). <sup>1</sup>H NMR (400 MHz, DMSO-*d*<sub>6</sub>):  $\delta_{\text{H}}$  = 0.84 (t, 6H,  $J$  = 4 Hz, 2×CH<sub>3</sub>), 1.24-1.29 (m, 44H, 22×CH<sub>2</sub>), 1.96 (bs, 4H, 2×NCH<sub>2</sub>CH<sub>2</sub>), 4.60-4.72 (m, 4H, 2×NCH<sub>2</sub>), 8.20 (d, 0.5H,  $J$  = 4 Hz, Ar-H), 8.30 (s, 0.25H, H-C=N), 8.43 (d, 0.5H,  $J$  = 8 Hz, Ar-H), 8.46 (d, 1.5H,  $J$  = 8 Hz, Ar-H), 8.56 (d, 1.5H,  $J$  = 4 Hz, Ar-H), 8.64 (s, 0.75H, H-C=N), 9.04 (d, 0.5H,  $J$  = 4 Hz, Ar-H), 9.16 (d, 1.5H,  $J$  = 4 Hz, Ar-H), 9.29 (d, 0.5H,  $J$  = 4 Hz, Ar-H), 9.39 (d, 1.5H,  $J$  = 8 Hz, Ar-H), 13.19 (s, 1H, CONH). <sup>13</sup>C NMR (100 MHz, DMSO-*d*<sub>6</sub>):  $\delta_{\text{C}}$  = 14.44 (2×CH<sub>3</sub>), 22.56, 25.86, 28.86, 29.09, 29.22, 29.38, 29.48, 31.15, 31.69 (24×CH<sub>2</sub>), 60.94, 61.61 (2×NCH<sub>2</sub>), 125.26, 125.41, 126.90, 127.72, 144.93, 145.34, 145.65, 146.35, 146.98, 149.14 (Ar-C), 160.33, 160.40 (C=N, C=O). HRMS (ESI)  $m/z$  = 874.3482 [M<sup>+</sup>].

***Characterization of 1-hexadecyl-4-((2-(1-hexadecylpyridin-1-ium-4-carbonyl)hydrazono)methyl)pyridin-1-ium iodide (14)***

It was obtained as yellow crystals in 90% yield; mp: 190-191 °C. FT-IR (KBr), cm<sup>-1</sup>:

$\bar{\nu}$  = 1546 (C=C), 1639 (C=N), 1688 (C=O), 2846-2918 (Al-H). <sup>1</sup>H NMR (400 MHz, DMSO-*d*<sub>6</sub>):  $\delta_{\text{H}}$  = 0.84 (t, 6H,  $J$  = 8 Hz, 2×CH<sub>3</sub>), 1.22-1.28 (m, 52H, 26×CH<sub>2</sub>), 1.95 (bs, 4H, 2×NCH<sub>2</sub>CH<sub>2</sub>), 4.57-4.69 (m, 4H, 2×NCH<sub>2</sub>), 8.15 (d, 0.5H,  $J$  = 4 Hz, Ar-H), 8.28 (s, 0.25H, H-C=N), 8.40 (d, 0.5H,  $J$  = 8 Hz, Ar-H), 8.44 (d, 1.5H,  $J$  = 8 Hz, Ar-H), 8.55 (d,

1.5H,  $J = 8$  Hz, Ar-H), 8.61 (s, 0.75H, H-C=N), 8.99 (d, 0.5H,  $J = 4$  Hz, Ar-H), 9.12 (d, 1.5H,  $J = 4$  Hz, Ar-H), 9.24 (d, 0.5H,  $J = 4$  Hz, Ar-H), 9.33 (d, 1.5H,  $J = 8$  Hz, Ar-H), 13.19 (s, 1H, CONH).  $^{13}\text{C}$  NMR (100 MHz, DMSO- $d_6$ ):  $\delta_{\text{C}} = 14.43$  ( $2\times\text{CH}_3$ ), 22.55, 25.85, 29.16, 29.25, 29.38, 29.46, 29.50, 31.15, 31.75 ( $28\times\text{CH}_2$ ), 60.94, 61.61 ( $2\times\text{NCH}_2$ ), 125.26, 125.41, 126.90, 127.72, 144.93, 145.34, 145.65, 146.35, 146.98, 149.14 (Ar-C), 160.35, 161.33 (C=N, C=O). HRMS (ESI)  $m/z = 930.4108$  [ $\text{M}^+$ ].

**Characterization of 1-octadecyl-4-((2-(1-octadecylpyridin-1-ium-4-carbonyl)hydrazono)methyl)pyridin-1-ium iodide (15)**

It was obtained as yellow crystals in 88% yield; mp: 192-193 °C. FT-IR (KBr),  $\text{cm}^{-1}$ :  $\bar{\nu} = 1545$  (C=C), 1643 (C=N), 1691 (C=O), 2845-2920 (Al-H).  $^1\text{H}$  NMR (400 MHz, DMSO- $d_6$ ):  $\delta_{\text{H}} = 0.84$  (t, 6H,  $J = 8$  Hz,  $2\times\text{CH}_3$ ), 1.23-1.29 (m, 60H,  $30\times\text{CH}_2$ ), 1.94 (bs, 4H,  $2\times\text{NCH}_2\text{CH}_2$ ), 4.59-4.69 (m, 4H,  $2\times\text{NCH}_2$ ), 8.18 (d, 0.5H,  $J = 8$  Hz, Ar-H), 8.29 (s, 0.25H, H-C=N), 8.43 (d, 0.5H,  $J = 8$  Hz, Ar-H), 8.46 (d, 1.5H,  $J = 8$  Hz, Ar-H), 8.56 (d, 1.5H,  $J = 8$  Hz, Ar-H), 8.63 (s, 0.75H, H-C=N), 9.02 (d, 0.5H,  $J = 8$  Hz, Ar-H), 9.14 (d, 1.5H,  $J = 4$  Hz, Ar-H), 9.28 (d, 0.5H,  $J = 4$  Hz, Ar-H), 9.36 (d, 1.5H,  $J = 4$  Hz, Ar-H), 13.18 (s, 1H, CONH).  $^{13}\text{C}$  NMR (100 MHz, DMSO- $d_6$ ):  $\delta_{\text{C}} = 14.44$  ( $2\times\text{CH}_3$ ), 22.57, 25.86, 28.87, 29.18, 29.27, 29.39, 29.48, 31.16, 31.76 ( $24\times\text{CH}_2$ ), 60.97, 61.65 ( $2\times\text{NCH}_2$ ), 125.26, 125.41, 126.90, 127.72, 144.93, 145.34, 145.65, 146.35, 146.98, 149.14 (Ar-C), 160.33, 160.40 (C=N, C=O). HRMS (ESI)  $m/z = 986.4734$  [ $\text{M}^+$ ].

**Characterization of 1-octyl-4-((2-(1-octylpyridin-1-ium-4-carbonyl)hydrazono)methyl)pyridin-1-ium hexafluorophosphate (16)**

It was obtained as yellow crystals in 89% yield; mp: 200-201 °C. FT-IR (KBr),  $\text{cm}^{-1}$ :  $\bar{\nu} = 1548$  (C=C), 1639 (C=N), 1688 (C=O), 2842-2910 (Al-H).  $^1\text{H}$  NMR (400 MHz, DMSO- $d_6$ ):  $\delta_{\text{H}} = 0.85$  (t, 6H,  $J = 8$  Hz,  $2\times\text{CH}_3$ ), 1.25-1.29 (m, 20H,  $10\times\text{CH}_2$ ), 1.96 (bs, 4H,  $2\times\text{NCH}_2\text{CH}_2$ ), 4.60-4.72 (m, 4H,  $2\times\text{NCH}_2$ ), 8.20 (d, 0.5H,  $J = 8$  Hz, Ar-H), 8.30 (s, 0.25H, H-C=N), 8.43 (d, 0.5H,  $J = 8$  Hz, Ar-H), 8.46 (d, 1.5H,  $J = 8$  Hz, Ar-H), 8.56 (d, 1.5H,  $J = 4$  Hz, Ar-H), 8.64 (s, 0.75H, H-C=N), 9.04 (d, 0.5H,  $J = 8$  Hz, Ar-H), 9.16 (d, 1.5H,  $J = 8$  Hz, Ar-H), 9.28 (d, 0.5H,  $J = 4$  Hz, Ar-H), 9.38 (d, 1.5H,  $J = 4$  Hz, Ar-H), 13.20 (s, 1H, CONH).  $^{13}\text{C}$  NMR (100 MHz, DMSO- $d_6$ ):  $\delta_{\text{C}} = 14.43$  ( $2\times\text{CH}_3$ ), 22.52,

25.87, 28.82, 28.92, 31.15, 31.60 (12×CH<sub>2</sub>), 60.96, 61.62 (2×NCH<sub>2</sub>), 125.26, 125.42, 126.91, 127.74, 144.95, 145.37, 145.66, 146.33, 146.96, 149.14 (Ar-C), 160.32, 160.35 (C=N, C=O). <sup>31</sup>P NMR (162 MHz, DMSO-*d*<sub>6</sub>): δ<sub>P</sub> = (-153.03) to (-135.47) (m, 2P, 2×PF<sub>6</sub>). <sup>19</sup>F NMR (377 MHz, DMSO-*d*<sub>6</sub>): δ<sub>F</sub> = -69.18 (d, 12F, 2×PF<sub>6</sub>). HRMS (ESI) *m/z* = 742.2799 [M<sup>+</sup>].

**Characterization of 1-octyl-4-((2-(1-octylpyridin-1-ium-4-carbonyl)hydrazono)methyl) pyridin-1-ium tetrafluoroborate (17)**

It was obtained as yellow crystals in 91% yield; mp: 205-206 °C. FT-IR (KBr), cm<sup>-1</sup>:  $\bar{\nu}$  = 1549 (C=C), 1638 (C=N), 1686 (C=O), 2848-2914 (Al-H). <sup>1</sup>H NMR (400 MHz, DMSO-*d*<sub>6</sub>): δ<sub>H</sub> = 0.85 (t, 6H, *J* = 8 Hz, 2×CH<sub>3</sub>), 1.25-1.29 (m, 20H, 10×CH<sub>2</sub>), 1.96 (bs, 4H, 2×NCH<sub>2</sub>CH<sub>2</sub>), 4.60-4.72 (m, 4H, 2×NCH<sub>2</sub>), 8.20 (d, 0.5H, *J* = 8 Hz, Ar-H), 8.30 (s, 0.25H, H-C=N), 8.43 (d, 0.5H, *J* = 8 Hz, Ar-H), 8.46 (d, 1.5H, *J* = 8 Hz, Ar-H), 8.56 (d, 1.5H, *J* = 4 Hz, Ar-H), 8.64 (s, 0.75H, H-C=N), 9.04 (d, 0.5H, *J* = 8 Hz, Ar-H), 9.16 (d, 1.5H, *J* = 8 Hz, Ar-H), 9.28 (d, 0.5H, *J* = 4 Hz, Ar-H), 9.38 (d, 1.5H, *J* = 4 Hz, Ar-H), 13.20 (s, 1H, CONH). <sup>13</sup>C NMR (100 MHz, DMSO-*d*<sub>6</sub>): δ<sub>C</sub> = 14.43 (2×CH<sub>3</sub>), 22.52, 25.87, 28.82, 28.92, 31.15, 31.60 (12×CH<sub>2</sub>), 60.96, 61.62 (2×NCH<sub>2</sub>), 125.26, 125.42, 126.91, 127.74, 144.95, 145.37, 145.66, 146.33, 146.96, 149.14 (Ar-C), 160.32, 160.35 (C=N, C=O). <sup>11</sup>B NMR (128 MHz, DMSO-*d*<sub>6</sub>): δ<sub>B</sub> = (-1.39) to (-1.23) (m, 2B, 2×BF<sub>4</sub>). <sup>19</sup>F NMR (377 MHz, DMSO-*d*<sub>6</sub>): δ<sub>F</sub> = -148.20, -148.14 (2d, 8F, 2×BF<sub>4</sub>). HRMS (ESI) *m/z* = 626.3573 [M<sup>+</sup>].

**Characterization of 1-octyl-4-((2-(1-octylpyridin-1-ium-4-carbonyl)hydrazono)methyl) pyridin-1-ium trifluoroacetate (18)**

It was obtained as yellow crystals in 95% yield; mp: 196-197 °C. FT-IR (KBr), cm<sup>-1</sup>:  $\bar{\nu}$  = 1550 (C=C), 1640 (C=N), 1690 (C=O), 2847-2911 (Al-H). <sup>1</sup>H NMR (400 MHz, DMSO-*d*<sub>6</sub>): δ<sub>H</sub> = 0.85 (t, 6H, *J* = 8 Hz, 2×CH<sub>3</sub>), 1.25-1.29 (m, 20H, 10×CH<sub>2</sub>), 1.96 (bs, 4H, 2×NCH<sub>2</sub>CH<sub>2</sub>), 4.60-4.72 (m, 4H, 2×NCH<sub>2</sub>), 8.20 (d, 0.5H, *J* = 8 Hz, Ar-H), 8.30 (s, 0.25H, H-C=N), 8.43 (d, 0.5H, *J* = 8 Hz, Ar-H), 8.46 (d, 1.5H, *J* = 8 Hz, Ar-H), 8.56 (d, 1.5H, *J* = 4 Hz, Ar-H), 8.64 (s, 0.75H, H-C=N), 9.04 (d, 0.5H, *J* = 8 Hz, Ar-H), 9.16 (d, 1.5H, *J* = 8 Hz, Ar-H), 9.28 (d, 0.5H, *J* = 4 Hz, Ar-H), 9.38 (d, 1.5H, *J* = 4 Hz, Ar-H),

13.20 (s, 1H, CONH).  $^{13}\text{C}$  NMR (100 MHz, DMSO- $d_6$ ):  $\delta_{\text{C}}$  = 14.43 (2 $\times$ CH $_3$ ), 22.52, 25.87, 28.82, 28.92, 31.15, 31.60 (12 $\times$ CH $_2$ ), 60.96, 61.62 (2 $\times$ NCH $_2$ ), 125.26, 125.42, 126.91, 127.74, 144.95, 145.37, 145.66, 146.33, 146.96, 149.14 (Ar-C), 160.32, 160.35 (C=N, C=O).  $^{19}\text{F}$  NMR (377 MHz, DMSO- $d_6$ ):  $\delta_{\text{F}}$  = -73.63 (s, 6F, 2 $\times$ CF $_3$ ). HRMS (ESI)  $m/z$  = 678.3216 [ $\text{M}^+$ ].

***Characterization of 1-nonyl-4-((2-(1-nonylpyridin-1-ium-4-carbonyl)hydrazono)methyl)pyridin-1-ium hexafluorophosphate (19)***

It was obtained as yellow crystals in 89% yield; mp: 202-203  $^{\circ}\text{C}$ . FT-IR (KBr),  $\text{cm}^{-1}$ :  $\bar{\nu}$  = 1544 (C=C), 1636 (C=N), 1685 (C=O), 2844-2910 (Al-H).  $^1\text{H}$  NMR (400 MHz, DMSO- $d_6$ ):  $\delta_{\text{H}}$  = 0.85 (t, 6H,  $J$  = 8 Hz, 2 $\times$ CH $_3$ ), 1.23-1.29 (m, 24H, 12 $\times$ CH $_2$ ), 1.95 (bs, 4H, 2 $\times$ NCH $_2$ CH $_2$ ), 4.59-4.70 (m, 4H, 2 $\times$ NCH $_2$ ), 8.17 (d, 0.5H,  $J$  = 4 Hz, Ar-H), 8.29 (s, 0.25H, H-C=N), 8.43 (d, 0.5H,  $J$  = 8 Hz, Ar-H), 8.45 (d, 1.5H,  $J$  = 4 Hz, Ar-H), 8.56 (d, 1.5H,  $J$  = 8 Hz, Ar-H), 8.63 (s, 0.75H, H-C=N), 9.02 (d, 0.5H,  $J$  = 8 Hz, Ar-H), 9.14 (d, 1.5H,  $J$  = 8 Hz, Ar-H), 9.26 (d, 0.5H,  $J$  = 4 Hz, Ar-H), 9.36 (d, 1.5H,  $J$  = 8 Hz, Ar-H), 13.18 (s, 1H, CONH).  $^{13}\text{C}$  NMR (100 MHz, DMSO- $d_6$ ):  $\delta_{\text{C}}$  = 14.44 (2 $\times$ CH $_3$ ), 22.57, 25.88, 25.91, 28.87, 29.18, 29.27, 29.39, 29.48, 29.53, 31.16, 31.76 (14 $\times$ CH $_2$ ), 61.67, 61.72 (2 $\times$ NCH $_2$ ), 125.26, 125.42, 126.91, 127.74, 144.95, 145.37, 145.66, 146.33, 146.96, 149.14 (Ar-C), 160.32, 160.35 (C=N, C=O).  $^{31}\text{P}$  NMR (162 MHz, DMSO- $d_6$ ):  $\delta_{\text{P}}$  = (-153.19) to (-135.75) (m, 2P, 2 $\times$ PF $_6$ ).  $^{19}\text{F}$  NMR (377 MHz, DMSO- $d_6$ ):  $\delta_{\text{F}}$  = -69.19 (d, 12F, 2 $\times$ PF $_6$ ). HRMS (ESI)  $m/z$  = 770.3112 [ $\text{M}^+$ ].

***Characterization of 1-nonyl-4-((2-(1-nonylpyridin-1-ium-4-carbonyl)hydrazono)methyl)pyridin-1-ium tetrafluoroborate (20)***

It was obtained as yellow crystals in 96% yield; mp: 210-211  $^{\circ}\text{C}$ . FT-IR (KBr),  $\text{cm}^{-1}$ :  $\bar{\nu}$  = 1552 (C=C), 1639 (C=N), 1692 (C=O), 2849-2917 (Al-H).  $^1\text{H}$  NMR (400 MHz, DMSO- $d_6$ ):  $\delta_{\text{H}}$  = 0.85 (t, 6H,  $J$  = 8 Hz, 2 $\times$ CH $_3$ ), 1.23-1.29 (m, 24H, 12 $\times$ CH $_2$ ), 1.95 (bs, 4H, 2 $\times$ NCH $_2$ CH $_2$ ), 4.59-4.70 (m, 4H, 2 $\times$ NCH $_2$ ), 8.17 (d, 0.5H,  $J$  = 4 Hz, Ar-H), 8.29 (s, 0.25H, H-C=N), 8.43 (d, 0.5H,  $J$  = 8 Hz, Ar-H), 8.45 (d, 1.5H,  $J$  = 4 Hz, Ar-H), 8.56 (d, 1.5H,  $J$  = 8 Hz, Ar-H), 8.63 (s, 0.75H, H-C=N), 9.02 (d, 0.5H,  $J$  = 8 Hz, Ar-H), 9.14 (d, 1.5H,  $J$  = 8 Hz, Ar-H), 9.26 (d, 0.5H,  $J$  = 4 Hz, Ar-H), 9.36 (d, 1.5H,  $J$  = 8 Hz, Ar-H),



13.18 (s, 1H, CONH).  $^{13}\text{C}$  NMR (100 MHz, DMSO- $d_6$ ):  $\delta_{\text{C}}$  = 14.44 ( $2\times\text{CH}_3$ ), 22.57, 25.88, 25.91, 28.87, 29.18, 29.27, 29.39, 29.48, 29.53, 31.16, 31.76 ( $14\times\text{CH}_2$ ), 61.67, 61.72 ( $2\times\text{NCH}_2$ ), 125.26, 125.42, 126.91, 127.74, 144.95, 145.37, 145.66, 146.33, 146.96, 149.14 (Ar-C), 160.32, 160.35 (C=N, C=O).  $^{11}\text{B}$  NMR (128 MHz, DMSO- $d_6$ ):  $\delta_{\text{B}}$  = (-1.42) to (-1.23) (m, 2B,  $2\times\text{BF}_4$ ).  $^{19}\text{F}$  NMR (377 MHz, DMSO- $d_6$ ):  $\delta_{\text{F}}$  = -148.21, -148.14 (2d, 8F,  $2\times\text{BF}_4$ ). HRMS (ESI)  $m/z$  = 654.3886 [ $\text{M}^+$ ].

***Characterization of 1-nonyl-4-((2-(1-nonylpyridin-1-ium-4-carbonyl)hydrazono)methyl)pyridin-1-ium trifluoroacetate (21)***

It was obtained as yellow crystals in 95% yield; mp: 188-189 °C. FT-IR (KBr),  $\text{cm}^{-1}$ :  $\bar{\nu}$  = 1550 (C=C), 1638 (C=N), 1689 (C=O), 2847-2917 (Al-H).  $^1\text{H}$  NMR (400 MHz, DMSO- $d_6$ ):  $\delta_{\text{H}}$  = 0.85 (t, 6H,  $J$  = 8 Hz,  $2\times\text{CH}_3$ ), 1.23-1.29 (m, 24H,  $12\times\text{CH}_2$ ), 1.95 (bs, 4H,  $2\times\text{NCH}_2\text{CH}_2$ ), 4.59-4.70 (m, 4H,  $2\times\text{NCH}_2$ ), 8.17 (d, 0.5H,  $J$  = 4 Hz, Ar-H), 8.29 (s, 0.25H, H-C=N), 8.43 (d, 0.5H,  $J$  = 8 Hz, Ar-H), 8.45 (d, 1.5H,  $J$  = 4 Hz, Ar-H), 8.56 (d, 1.5H,  $J$  = 8 Hz, Ar-H), 8.63 (s, 0.75H, H-C=N), 9.02 (d, 0.5H,  $J$  = 8 Hz, Ar-H), 9.14 (d, 1.5H,  $J$  = 8 Hz, Ar-H), 9.26 (d, 0.5H,  $J$  = 4 Hz, Ar-H), 9.36 (d, 1.5H,  $J$  = 8 Hz, Ar-H), 13.18 (s, 1H, CONH).  $^{13}\text{C}$  NMR (100 MHz, DMSO- $d_6$ ):  $\delta_{\text{C}}$  = 14.44 ( $2\times\text{CH}_3$ ), 22.57, 25.88, 25.91, 28.87, 29.18, 29.27, 29.39, 29.48, 29.53, 31.16, 31.76 ( $14\times\text{CH}_2$ ), 61.67, 61.72 ( $2\times\text{NCH}_2$ ), 125.26, 125.42, 126.91, 127.74, 144.95, 145.37, 145.66, 146.33, 146.96, 149.14 (Ar-C), 160.32, 160.35 (C=N, C=O).  $^{19}\text{F}$  NMR (377 MHz, DMSO- $d_6$ ):  $\delta_{\text{F}}$  = -73.59 (s, 6F,  $2\times\text{CF}_3$ ). HRMS (ESI)  $m/z$  = 706.3529 [ $\text{M}^+$ ].

***Characterization of 1-decyl-4-((2-(1-decylpyridin-1-ium-4-carbonyl)hydrazono)methyl)pyridin-1-ium hexafluorophosphate (22)***

It was obtained as yellow crystals in 93% yield; mp: 135-136 °C. FT-IR (KBr),  $\text{cm}^{-1}$ :  $\bar{\nu}$  = 1553 (C=C), 1640 (C=N), 1688 (C=O), 2846-2915 (Al-H).  $^1\text{H}$  NMR (400 MHz, DMSO- $d_6$ ):  $\delta_{\text{H}}$  = 0.84 (t, 6H,  $J$  = 4 Hz,  $2\times\text{CH}_3$ ), 1.24-1.29 (m, 28H,  $14\times\text{CH}_2$ ), 1.95 (bs, 4H,  $2\times\text{NCH}_2\text{CH}_2$ ), 4.59-4.71 (m, 4H,  $2\times\text{NCH}_2$ ), 8.19 (d, 0.5H,  $J$  = 4 Hz, Ar-H), 8.30 (s, 0.25H, H-C=N), 8.43 (d, 0.5H,  $J$  = 8 Hz, Ar-H), 8.46 (d, 1.5H,  $J$  = 4 Hz, Ar-H), 8.56 (d, 1.5H,  $J$  = 4 Hz, Ar-H), 8.63 (s, 0.75H, H-C=N), 9.02 (d, 0.5H,  $J$  = 4 Hz, Ar-H), 9.15 (d, 1.5H,  $J$  = 4 Hz, Ar-H), 9.28 (d, 0.5H,  $J$  = 4 Hz, Ar-H), 9.37 (d, 1.5H,  $J$  = 4 Hz, Ar-H),



13.20 (s, 1H, CONH).  $^{13}\text{C}$  NMR (100 MHz, DMSO- $d_6$ ):  $\delta_{\text{C}}$  = 14.45 (2 $\times$ CH<sub>3</sub>), 22.57, 25.87, 25.91, 28.86, 29.13, 29.27, 29.35, 29.48, 31.15, 31.75 (16 $\times$ CH<sub>2</sub>), 60.95, 61.62 (2 $\times$ NCH<sub>2</sub>), 125.26, 125.42, 126.91, 127.74, 144.95, 145.37, 145.66, 146.33, 146.96, 149.14 (Ar-C), 160.25, 160.33 (C=N, C=O).  $^{31}\text{P}$  NMR (162 MHz, DMSO- $d_6$ ):  $\delta_{\text{P}}$  = (-153.03) to (-135.47) (m, 2P, 2 $\times$ PF<sub>6</sub>).  $^{19}\text{F}$  NMR (377 MHz, DMSO- $d_6$ ):  $\delta_{\text{F}}$  = -69.19 (d, 12F, 2 $\times$ PF<sub>6</sub>). HRMS (ESI)  $m/z$  = 798.3425 [M<sup>+</sup>].

***Characterization of 1-decyl-4-((2-(1-decylpyridin-1-ium-4-carbonyl)hydrazono)methyl)pyridin-1-ium tetrafluoroborate (23)***

It was obtained as yellow crystals in 88% yield; mp: 189-190 °C. FT-IR (KBr), cm<sup>-1</sup>:  $\bar{\nu}$  = 1548 (C=C), 1639 (C=N), 1685 (C=O), 2842-2910 (Al-H).  $^1\text{H}$  NMR (400 MHz, DMSO- $d_6$ ):  $\delta_{\text{H}}$  = 0.84 (t, 6H,  $J$  = 4 Hz, 2 $\times$ CH<sub>3</sub>), 1.24-1.29 (m, 28H, 14 $\times$ CH<sub>2</sub>), 1.95 (bs, 4H, 2 $\times$ NCH<sub>2</sub>CH<sub>2</sub>), 4.59-4.71 (m, 4H, 2 $\times$ NCH<sub>2</sub>), 8.19 (d, 0.5H,  $J$  = 4 Hz, Ar-H), 8.30 (s, 0.25H, H-C=N), 8.43 (d, 0.5H,  $J$  = 8 Hz, Ar-H), 8.46 (d, 1.5H,  $J$  = 4 Hz, Ar-H), 8.56 (d, 1.5H,  $J$  = 4 Hz, Ar-H), 8.63 (s, 0.75H, H-C=N), 9.02 (d, 0.5H,  $J$  = 4 Hz, Ar-H), 9.15 (d, 1.5H,  $J$  = 4 Hz, Ar-H), 9.28 (d, 0.5H,  $J$  = 4 Hz, Ar-H), 9.37 (d, 1.5H,  $J$  = 4 Hz, Ar-H), 13.20 (s, 1H, CONH).  $^{13}\text{C}$  NMR (100 MHz, DMSO- $d_6$ ):  $\delta_{\text{C}}$  = 14.45 (2 $\times$ CH<sub>3</sub>), 22.57, 25.87, 25.91, 28.86, 29.13, 29.27, 29.35, 29.48, 31.15, 31.75 (16 $\times$ CH<sub>2</sub>), 60.95, 61.62 (2 $\times$ NCH<sub>2</sub>), 125.26, 125.42, 126.91, 127.74, 144.95, 145.37, 145.66, 146.33, 146.96, 149.14 (Ar-C), 160.25, 160.33 (C=N, C=O).  $^{11}\text{B}$  NMR (128 MHz, DMSO- $d_6$ ):  $\delta_{\text{B}}$  = (-1.40) to (-1.24) (m, 2B, 2 $\times$ BF<sub>4</sub>).  $^{19}\text{F}$  NMR (377 MHz, DMSO- $d_6$ ):  $\delta_{\text{F}}$  = -148.21, -148.14 (2d, 8F, 2 $\times$ BF<sub>4</sub>). HRMS (ESI)  $m/z$  = 682.4199 [M<sup>+</sup>].

***Characterization of 1-decyl-4-((2-(1-decylpyridin-1-ium-4-carbonyl)hydrazono)methyl)pyridin-1-ium trifluoroacetate (24)***

It was obtained as yellow crystals in 89% yield; mp: 185-186 °C. FT-IR (KBr), cm<sup>-1</sup>:  $\bar{\nu}$  = 1550 (C=C), 1636 (C=N), 1691 (C=O), 2846-2918 (Al-H).  $^1\text{H}$  NMR (400 MHz, DMSO- $d_6$ ):  $\delta_{\text{H}}$  = 0.84 (t, 6H,  $J$  = 4 Hz, 2 $\times$ CH<sub>3</sub>), 1.24-1.29 (m, 28H, 14 $\times$ CH<sub>2</sub>), 1.95 (bs, 4H, 2 $\times$ NCH<sub>2</sub>CH<sub>2</sub>), 4.59-4.71 (m, 4H, 2 $\times$ NCH<sub>2</sub>), 8.19 (d, 0.5H,  $J$  = 4 Hz, Ar-H), 8.30 (s, 0.25H, H-C=N), 8.43 (d, 0.5H,  $J$  = 8 Hz, Ar-H), 8.46 (d, 1.5H,  $J$  = 4 Hz, Ar-H), 8.56 (d, 1.5H,  $J$  = 4 Hz, Ar-H), 8.63 (s, 0.75H, H-C=N), 9.02 (d, 0.5H,  $J$  = 4 Hz, Ar-H), 9.15 (d,

1.5H,  $J = 4$  Hz, Ar-H), 9.28 (d, 0.5H,  $J = 4$  Hz, Ar-H), 9.37 (d, 1.5H,  $J = 4$  Hz, Ar-H), 13.20 (s, 1H, CONH).  $^{13}\text{C}$  NMR (100 MHz, DMSO- $d_6$ ):  $\delta_{\text{C}} = 14.45$  ( $2\times\text{CH}_3$ ), 22.57, 25.87, 25.91, 28.86, 29.13, 29.27, 29.35, 29.48, 31.15, 31.75 ( $16\times\text{CH}_2$ ), 60.95, 61.62 ( $2\times\text{NCH}_2$ ), 125.26, 125.42, 126.91, 127.74, 144.95, 145.37, 145.66, 146.33, 146.96, 149.14 (Ar-C), 160.25, 160.33 (C=N, C=O).  $^{19}\text{F}$  NMR (377 MHz, DMSO- $d_6$ ):  $\delta_{\text{F}} = -73.61$  (s, 6F,  $2\times\text{CF}_3$ ). HRMS (ESI)  $m/z = 734.3842$  [ $\text{M}^+$ ].

**Characterization of 1-dodecyl-4-((2-(1-dodecylpyridin-1-ium-4-carbonyl)hydrazono) methyl)pyridin-1-ium hexafluorophosphate (25)**

It was obtained as yellow crystals in 90% yield; mp: 184-185 °C. FT-IR (KBr),  $\text{cm}^{-1}$ :  $\bar{\nu} = 1547$  (C=C), 1639 (C=N), 1690 (C=O), 2846-2913 (Al-H).  $^1\text{H}$  NMR (400 MHz, DMSO- $d_6$ ):  $\delta_{\text{H}} = 0.84$  (t, 6H,  $J = 4$  Hz,  $2\times\text{CH}_3$ ), 1.23-1.29 (m, 36H,  $18\times\text{CH}_2$ ), 1.95 (bs, 4H,  $2\times\text{NCH}_2\text{CH}_2$ ), 4.59-4.71 (m, 4H,  $2\times\text{NCH}_2$ ), 8.18 (d, 0.5H,  $J = 4$  Hz, Ar-H), 8.30 (s, 0.25H, H-C=N), 8.43 (d, 0.5H,  $J = 8$  Hz, Ar-H), 8.45 (d, 1.5H,  $J = 4$  Hz, Ar-H), 8.56 (d, 1.5H,  $J = 4$  Hz, Ar-H), 8.63 (s, 0.75H, H-C=N), 9.03 (d, 0.5H,  $J = 8$  Hz, Ar-H), 9.15 (d, 1.5H,  $J = 8$  Hz, Ar-H), 9.28 (d, 0.5H,  $J = 4$  Hz, Ar-H), 9.37 (d, 1.5H,  $J = 4$  Hz, Ar-H), 13.20 (s, 1H, CONH).  $^{13}\text{C}$  NMR (100 MHz, DMSO- $d_6$ ):  $\delta_{\text{C}} = 14.44$  ( $2\times\text{CH}_3$ ), 22.57, 25.86, 29.19, 29.27, 29.38, 29.39, 29.48, 31.15, 31.76 ( $20\times\text{CH}_2$ ), 60.95, 61.62 ( $2\times\text{NCH}_2$ ), 125.26, 125.42, 126.91, 127.74, 144.93, 145.37, 145.66, 146.35, 146.96, 149.17 (Ar-C), 160.25, 160.33 (C=N, C=O).  $^{31}\text{P}$  NMR (162 MHz, DMSO- $d_6$ ):  $\delta_{\text{P}} = (-153.02)$  to  $(-135.45)$  (m, 2P,  $2\times\text{PF}_6$ ).  $^{19}\text{F}$  NMR (377 MHz, DMSO- $d_6$ ):  $\delta_{\text{F}} = -69.19$  (d, 12F,  $2\times\text{PF}_6$ ). HRMS (ESI)  $m/z = 854.4051$  [ $\text{M}^+$ ].

**Characterization of 1-dodecyl-4-((2-(1-dodecylpyridin-1-ium-4-carbonyl)hydrazono) methyl)pyridin-1-ium tetrafluoroborate (26)**

It was obtained as yellow crystals in 95% yield; mp: 193-194 °C. FT-IR (KBr),  $\text{cm}^{-1}$ :  $\bar{\nu} = 1547$  (C=C), 1640 (C=N), 1689 (C=O), 2845-2919 (Al-H).  $^1\text{H}$  NMR (400 MHz, DMSO- $d_6$ ):  $\delta_{\text{H}} = 0.84$  (t, 6H,  $J = 4$  Hz,  $2\times\text{CH}_3$ ), 1.23-1.29 (m, 36H,  $18\times\text{CH}_2$ ), 1.95 (bs, 4H,  $2\times\text{NCH}_2\text{CH}_2$ ), 4.59-4.71 (m, 4H,  $2\times\text{NCH}_2$ ), 8.18 (d, 0.5H,  $J = 4$  Hz, Ar-H), 8.30 (s, 0.25H, H-C=N), 8.43 (d, 0.5H,  $J = 8$  Hz, Ar-H), 8.45 (d, 1.5H,  $J = 4$  Hz, Ar-H), 8.56 (d, 1.5H,  $J = 4$  Hz, Ar-H), 8.63 (s, 0.75H, H-C=N), 9.03 (d, 0.5H,  $J = 8$  Hz, Ar-H), 9.15 (d,

1.5H,  $J = 8$  Hz, Ar-H), 9.28 (d, 0.5H,  $J = 4$  Hz, Ar-H), 9.37 (d, 1.5H,  $J = 4$  Hz, Ar-H), 13.20 (s, 1H, CONH).  $^{13}\text{C}$  NMR (100 MHz, DMSO- $d_6$ ):  $\delta_{\text{C}} = 14.44$  ( $2\times\text{CH}_3$ ), 22.57, 25.86, 29.19, 29.27, 29.38, 29.39, 29.48, 31.15, 31.76 ( $20\times\text{CH}_2$ ), 60.95, 61.62 ( $2\times\text{NCH}_2$ ), 125.26, 125.42, 126.91, 127.74, 144.93, 145.37, 145.66, 146.35, 146.96, 149.17 (Ar-C), 160.25, 160.33 (C=N, C=O).  $^{11}\text{B}$  NMR (128 MHz, DMSO- $d_6$ ):  $\delta_{\text{B}} = (-1.41)$  to  $(-1.24)$  (m, 2B,  $2\times\text{BF}_4$ ).  $^{19}\text{F}$  NMR (377 MHz, DMSO- $d_6$ ):  $\delta_{\text{F}} = -148.20, -148.14$  (2d, 8F,  $2\times\text{BF}_4$ ). HRMS (ESI)  $m/z = 738.4825$  [ $\text{M}^+$ ].

**Characterization of 1-dodecyl-4-((2-(1-dodecylpyridin-1-ium-4-carbonyl)hydrazono) methyl)pyridin-1-ium trifluoroacetate (27)**

It was obtained as yellow crystals in 91% yield; mp: 179-180 °C. FT-IR (KBr),  $\text{cm}^{-1}$ :  $\bar{\nu} = 1546$  (C=C), 1641 (C=N), 1692 (C=O), 2845-2918 (Al-H).  $^1\text{H}$  NMR (400 MHz, DMSO- $d_6$ ):  $\delta_{\text{H}} = 0.84$  (t, 6H,  $J = 4$  Hz,  $2\times\text{CH}_3$ ), 1.23-1.29 (m, 36H,  $18\times\text{CH}_2$ ), 1.95 (bs, 4H,  $2\times\text{NCH}_2\text{CH}_2$ ), 4.59-4.71 (m, 4H,  $2\times\text{NCH}_2$ ), 8.18 (d, 0.5H,  $J = 4$  Hz, Ar-H), 8.30 (s, 0.25H, H-C=N), 8.43 (d, 0.5H,  $J = 8$  Hz, Ar-H), 8.45 (d, 1.5H,  $J = 4$  Hz, Ar-H), 8.56 (d, 1.5H,  $J = 4$  Hz, Ar-H), 8.63 (s, 0.75H, H-C=N), 9.03 (d, 0.5H,  $J = 8$  Hz, Ar-H), 9.15 (d, 1.5H,  $J = 8$  Hz, Ar-H), 9.28 (d, 0.5H,  $J = 4$  Hz, Ar-H), 9.37 (d, 1.5H,  $J = 4$  Hz, Ar-H), 13.20 (s, 1H, CONH).  $^{13}\text{C}$  NMR (100 MHz, DMSO- $d_6$ ):  $\delta_{\text{C}} = 14.44$  ( $2\times\text{CH}_3$ ), 22.57, 25.86, 29.19, 29.27, 29.38, 29.39, 29.48, 31.15, 31.76 ( $20\times\text{CH}_2$ ), 60.95, 61.62 ( $2\times\text{NCH}_2$ ), 125.26, 125.42, 126.91, 127.74, 144.93, 145.37, 145.66, 146.35, 146.96, 149.17 (Ar-C), 160.25, 160.33 (C=N, C=O).  $^{19}\text{F}$  NMR (377 MHz, DMSO- $d_6$ ):  $\delta_{\text{F}} = -73.65$  (s, 6F,  $2\times\text{CF}_3$ ). HRMS (ESI)  $m/z = 790.4468$  [ $\text{M}^+$ ].

**Characterization of 1-tetradecyl-4-((2-(1-tetradecylpyridin-1-ium-4-carbonyl)hydrazono)methyl)pyridin-1-ium hexafluorophosphate (28)**

It was obtained as yellow crystals in 92% yield; mp: 180-181 °C. FT-IR (KBr),  $\text{cm}^{-1}$ :  $\bar{\nu} = 1553$  (C=C), 1642 (C=N), 1692 (C=O), 2846-2917 (Al-H).  $^1\text{H}$  NMR (400 MHz, DMSO- $d_6$ ):  $\delta_{\text{H}} = 0.84$  (t, 6H,  $J = 4$  Hz,  $2\times\text{CH}_3$ ), 1.24-1.29 (m, 44H,  $22\times\text{CH}_2$ ), 1.96 (bs, 4H,  $2\times\text{NCH}_2\text{CH}_2$ ), 4.60-4.72 (m, 4H,  $2\times\text{NCH}_2$ ), 8.20 (d, 0.5H,  $J = 4$  Hz, Ar-H), 8.30 (s, 0.25H, H-C=N), 8.43 (d, 0.5H,  $J = 8$  Hz, Ar-H), 8.46 (d, 1.5H,  $J = 8$  Hz, Ar-H), 8.56 (d, 1.5H,  $J = 4$  Hz, Ar-H), 8.64 (s, 0.75H, H-C=N), 9.04 (d, 0.5H,  $J = 4$  Hz, Ar-H), 9.16 (d,

1.5H,  $J = 4$  Hz, Ar-H), 9.29 (d, 0.5H,  $J = 4$  Hz, Ar-H), 9.39 (d, 1.5H,  $J = 8$  Hz, Ar-H), 13.19 (s, 1H, CONH).  $^{13}\text{C}$  NMR (100 MHz, DMSO- $d_6$ ):  $\delta_{\text{C}} = 14.44$  ( $2\times\text{CH}_3$ ), 22.56, 25.86, 28.86, 29.09, 29.22, 29.38, 29.48, 31.15, 31.69 ( $24\times\text{CH}_2$ ), 60.94, 61.61 ( $2\times\text{NCH}_2$ ), 125.26, 125.41, 126.90, 127.72, 144.93, 145.34, 145.65, 146.35, 146.98, 149.14 (Ar-C), 160.33, 160.40 (C=N, C=O).  $^{31}\text{P}$  NMR (162 MHz, DMSO- $d_6$ ):  $\delta_{\text{P}} = (-153.31)$  to  $(-135.84)$  (m, 2P,  $2\times\text{PF}_6$ ).  $^{19}\text{F}$  NMR (377 MHz, DMSO- $d_6$ ):  $\delta_{\text{F}} = -69.19$  (d, 12F,  $2\times\text{PF}_6$ ). HRMS (ESI)  $m/z = 910.4677$  [ $\text{M}^+$ ].

***Characterization of 1-tetradecyl-4-((2-(1-tetradecylpyridin-1-ium-4-carbonyl)hydrazono)methyl)pyridin-1-ium tetrafluoroborate (29)***

It was obtained as yellow crystals in 92% yield; mp: 183-184 °C. FT-IR (KBr),  $\text{cm}^{-1}$ :

$\bar{\nu} = 1548$  (C=C), 1639 (C=N), 1689 (C=O), 2846-2917 (Al-H).  $^1\text{H}$  NMR (400 MHz, DMSO- $d_6$ ):  $\delta_{\text{H}} = 0.84$  (t, 6H,  $J = 4$  Hz,  $2\times\text{CH}_3$ ), 1.24-1.29 (m, 44H,  $22\times\text{CH}_2$ ), 1.96 (bs, 4H,  $2\times\text{NCH}_2\text{CH}_2$ ), 4.60-4.72 (m, 4H,  $2\times\text{NCH}_2$ ), 8.20 (d, 0.5H,  $J = 4$  Hz, Ar-H), 8.30 (s, 0.25H, H-C=N), 8.43 (d, 0.5H,  $J = 8$  Hz, Ar-H), 8.46 (d, 1.5H,  $J = 8$  Hz, Ar-H), 8.56 (d, 1.5H,  $J = 4$  Hz, Ar-H), 8.64 (s, 0.75H, H-C=N), 9.04 (d, 0.5H,  $J = 4$  Hz, Ar-H), 9.16 (d, 1.5H,  $J = 4$  Hz, Ar-H), 9.29 (d, 0.5H,  $J = 4$  Hz, Ar-H), 9.39 (d, 1.5H,  $J = 8$  Hz, Ar-H), 13.19 (s, 1H, CONH).  $^{13}\text{C}$  NMR (100 MHz, DMSO- $d_6$ ):  $\delta_{\text{C}} = 14.44$  ( $2\times\text{CH}_3$ ), 22.56, 25.86, 28.86, 29.09, 29.22, 29.38, 29.48, 31.15, 31.69 ( $24\times\text{CH}_2$ ), 60.94, 61.61 ( $2\times\text{NCH}_2$ ), 125.26, 125.41, 126.90, 127.72, 144.93, 145.34, 145.65, 146.35, 146.98, 149.14 (Ar-C), 160.33, 160.40 (C=N, C=O).  $^{11}\text{B}$  NMR (128 MHz, DMSO- $d_6$ ):  $\delta_{\text{B}} = (-1.39)$  to  $(-1.24)$  (m, 2B,  $2\times\text{BF}_4$ ).  $^{19}\text{F}$  NMR (377 MHz, DMSO- $d_6$ ):  $\delta_{\text{F}} = -148.21, -148.15$  (2d, 8F,  $2\times\text{BF}_4$ ). HRMS (ESI)  $m/z = 794.5451$  [ $\text{M}^+$ ].

***Characterization of 1-tetradecyl-4-((2-(1-tetradecylpyridin-1-ium-4-carbonyl)hydrazono)methyl)pyridin-1-ium trifluoroacetate (30)***

It was obtained as yellow crystals in 89% yield; mp: 171-172 °C. FT-IR (KBr),  $\text{cm}^{-1}$ :

$\bar{\nu} = 1550$  (C=C), 1638 (C=N), 1691 (C=O), 2845-2917 (Al-H).  $^1\text{H}$  NMR (400 MHz, DMSO- $d_6$ ):  $\delta_{\text{H}} = 0.84$  (t, 6H,  $J = 4$  Hz,  $2\times\text{CH}_3$ ), 1.24-1.29 (m, 44H,  $22\times\text{CH}_2$ ), 1.96 (bs, 4H,  $2\times\text{NCH}_2\text{CH}_2$ ), 4.60-4.72 (m, 4H,  $2\times\text{NCH}_2$ ), 8.20 (d, 0.5H,  $J = 4$  Hz, Ar-H), 8.30 (s, 0.25H, H-C=N), 8.43 (d, 0.5H,  $J = 8$  Hz, Ar-H), 8.46 (d, 1.5H,  $J = 8$  Hz, Ar-H), 8.56 (d,

1.5H,  $J = 4$  Hz, Ar-H), 8.64 (s, 0.75H, H-C=N), 9.04 (d, 0.5H,  $J = 4$  Hz, Ar-H), 9.16 (d, 1.5H,  $J = 4$  Hz, Ar-H), 9.29 (d, 0.5H,  $J = 4$  Hz, Ar-H), 9.39 (d, 1.5H,  $J = 8$  Hz, Ar-H), 13.19 (s, 1H, CONH).  $^{13}\text{C}$  NMR (100 MHz, DMSO- $d_6$ ):  $\delta_{\text{C}} = 14.44$  ( $2\times\text{CH}_3$ ), 22.56, 25.86, 28.86, 29.09, 29.22, 29.38, 29.48, 31.15, 31.69 ( $24\times\text{CH}_2$ ), 60.94, 61.61 ( $2\times\text{NCH}_2$ ), 125.26, 125.41, 126.90, 127.72, 144.93, 145.34, 145.65, 146.35, 146.98, 149.14 (Ar-C), 160.33, 160.40 (C=N, C=O).  $^{19}\text{F}$  NMR (377 MHz, DMSO- $d_6$ ):  $\delta_{\text{F}} = -73.59$  (s, 6F,  $2\times\text{CF}_3$ ). HRMS (ESI)  $m/z = 846.5094$  [ $\text{M}^+$ ].

***Characterization of 1-hexadecyl-4-((2-(1-hexadecylpyridin-1-ium-4-carbonyl)hydrazono)methyl)pyridin-1-ium hexafluorophosphate (31)***

It was obtained as yellow crystals in 90% yield; mp: 169-170 °C. FT-IR (KBr),  $\text{cm}^{-1}$ :  $\bar{\nu} = 1547$  (C=C), 1640 (C=N), 1689 (C=O), 2844-2911 (Al-H).  $^1\text{H}$  NMR (400 MHz, DMSO- $d_6$ ):  $\delta_{\text{H}} = 0.84$  (t, 6H,  $J = 8$  Hz,  $2\times\text{CH}_3$ ), 1.22-1.28 (m, 52H,  $26\times\text{CH}_2$ ), 1.95 (bs, 4H,  $2\times\text{NCH}_2\text{CH}_2$ ), 4.57-4.69 (m, 4H,  $2\times\text{NCH}_2$ ), 8.15 (d, 0.5H,  $J = 4$  Hz, Ar-H), 8.28 (s, 0.25H, H-C=N), 8.40 (d, 0.5H,  $J = 8$  Hz, Ar-H), 8.44 (d, 1.5H,  $J = 8$  Hz, Ar-H), 8.55 (d, 1.5H,  $J = 8$  Hz, Ar-H), 8.61 (s, 0.75H, H-C=N), 8.99 (d, 0.5H,  $J = 4$  Hz, Ar-H), 9.12 (d, 1.5H,  $J = 4$  Hz, Ar-H), 9.24 (d, 0.5H,  $J = 4$  Hz, Ar-H), 9.33 (d, 1.5H,  $J = 8$  Hz, Ar-H), 13.19 (s, 1H, CONH).  $^{13}\text{C}$  NMR (100 MHz, DMSO- $d_6$ ):  $\delta_{\text{C}} = 14.43$  ( $2\times\text{CH}_3$ ), 22.55, 25.85, 29.16, 29.25, 29.38, 29.46, 29.50, 31.15, 31.75 ( $28\times\text{CH}_2$ ), 60.94, 61.61 ( $2\times\text{NCH}_2$ ), 125.26, 125.41, 126.90, 127.72, 144.93, 145.34, 145.65, 146.35, 146.98, 149.14 (Ar-C), 160.35, 161.33 (C=N, C=O).  $^{31}\text{P}$  NMR (162 MHz, DMSO- $d_6$ ):  $\delta_{\text{P}} = (-153.29)$  to  $(-135.70)$  (m, 2P,  $2\times\text{PF}_6$ ).  $^{19}\text{F}$  NMR (377 MHz, DMSO- $d_6$ ):  $\delta_{\text{F}} = -69.19$  (d, 12F,  $2\times\text{PF}_6$ ). HRMS (ESI)  $m/z = 966.5303$  [ $\text{M}^+$ ].

***Characterization of 1-hexadecyl-4-((2-(1-hexadecylpyridin-1-ium-4-carbonyl)hydrazono)methyl)pyridin-1-ium tetrafluoroborate (32)***

It was obtained as yellow crystals in 92% yield; mp: 177-178 °C. FT-IR (KBr),  $\text{cm}^{-1}$ :  $\bar{\nu} = 1551$  (C=C), 1641 (C=N), 1690 (C=O), 2849-2917 (Al-H).  $^1\text{H}$  NMR (400 MHz, DMSO- $d_6$ ):  $\delta_{\text{H}} = 0.84$  (t, 6H,  $J = 8$  Hz,  $2\times\text{CH}_3$ ), 1.22-1.28 (m, 52H,  $26\times\text{CH}_2$ ), 1.95 (bs, 4H,  $2\times\text{NCH}_2\text{CH}_2$ ), 4.57-4.69 (m, 4H,  $2\times\text{NCH}_2$ ), 8.15 (d, 0.5H,  $J = 4$  Hz, Ar-H), 8.28 (s, 0.25H, H-C=N), 8.40 (d, 0.5H,  $J = 8$  Hz, Ar-H), 8.44 (d, 1.5H,  $J = 8$  Hz, Ar-H), 8.55 (d,

1.5H,  $J = 8$  Hz, Ar-H), 8.61 (s, 0.75H, H-C=N), 8.99 (d, 0.5H,  $J = 4$  Hz, Ar-H), 9.12 (d, 1.5H,  $J = 4$  Hz, Ar-H), 9.24 (d, 0.5H,  $J = 4$  Hz, Ar-H), 9.33 (d, 1.5H,  $J = 8$  Hz, Ar-H), 13.19 (s, 1H, CONH).  $^{13}\text{C}$  NMR (100 MHz, DMSO- $d_6$ ):  $\delta_{\text{C}} = 14.43$  ( $2\times\text{CH}_3$ ), 22.55, 25.85, 29.16, 29.25, 29.38, 29.46, 29.50, 31.15, 31.75 ( $28\times\text{CH}_2$ ), 60.94, 61.61 ( $2\times\text{NCH}_2$ ), 125.26, 125.41, 126.90, 127.72, 144.93, 145.34, 145.65, 146.35, 146.98, 149.14 (Ar-C), 160.35, 161.33 (C=N, C=O).  $^{11}\text{B}$  NMR (128 MHz, DMSO- $d_6$ ):  $\delta_{\text{B}} = (-1.39)$  to  $(-1.24)$  (m, 2B,  $2\times\text{BF}_4$ ).  $^{19}\text{F}$  NMR (377 MHz, DMSO- $d_6$ ):  $\delta_{\text{F}} = -148.14, -148.21$  (2d, 8F,  $2\times\text{BF}_4$ ). HRMS (ESI)  $m/z = 850.6077$  [ $\text{M}^+$ ].

***Characterization of 1-hexadecyl-4-((2-(1-hexadecylpyridin-1-ium-4-carbonyl)hydrazono)methyl)pyridin-1-ium trifluoroacetate (33)***

It was obtained as yellow crystals in 94% yield; mp: 173-174 °C. FT-IR (KBr),  $\text{cm}^{-1}$ :  $\bar{\nu} = 1547$  (C=C), 1636 (C=N), 1689 (C=O), 2843-2919 (Al-H).  $^1\text{H}$  NMR (400 MHz, DMSO- $d_6$ ):  $\delta_{\text{H}} = 0.84$  (t, 6H,  $J = 8$  Hz,  $2\times\text{CH}_3$ ), 1.22-1.28 (m, 52H,  $26\times\text{CH}_2$ ), 1.95 (bs, 4H,  $2\times\text{NCH}_2\text{CH}_2$ ), 4.57-4.69 (m, 4H,  $2\times\text{NCH}_2$ ), 8.15 (d, 0.5H,  $J = 4$  Hz, Ar-H), 8.28 (s, 0.25H, H-C=N), 8.40 (d, 0.5H,  $J = 8$  Hz, Ar-H), 8.44 (d, 1.5H,  $J = 8$  Hz, Ar-H), 8.55 (d, 1.5H,  $J = 8$  Hz, Ar-H), 8.61 (s, 0.75H, H-C=N), 8.99 (d, 0.5H,  $J = 4$  Hz, Ar-H), 9.12 (d, 1.5H,  $J = 4$  Hz, Ar-H), 9.24 (d, 0.5H,  $J = 4$  Hz, Ar-H), 9.33 (d, 1.5H,  $J = 8$  Hz, Ar-H), 13.19 (s, 1H, CONH).  $^{13}\text{C}$  NMR (100 MHz, DMSO- $d_6$ ):  $\delta_{\text{C}} = 14.43$  ( $2\times\text{CH}_3$ ), 22.55, 25.85, 29.16, 29.25, 29.38, 29.46, 29.50, 31.15, 31.75 ( $28\times\text{CH}_2$ ), 60.94, 61.61 ( $2\times\text{NCH}_2$ ), 125.26, 125.41, 126.90, 127.72, 144.93, 145.34, 145.65, 146.35, 146.98, 149.14 (Ar-C), 160.35, 161.33 (C=N, C=O).  $^{19}\text{F}$  NMR (377 MHz, DMSO- $d_6$ ):  $\delta_{\text{F}} = -73.57$  (s, 6F,  $2\times\text{CF}_3$ ). HRMS (ESI)  $m/z = 902.5720$  [ $\text{M}^+$ ].

***Characterization of 1-octadecyl-4-((2-(1-octadecylpyridin-1-ium-4-carbonyl)hydrazono)methyl)pyridin-1-ium hexafluorophosphate (34)***

It was obtained as yellow crystals in 92% yield; mp: 160-161 °C. FT-IR (KBr),  $\text{cm}^{-1}$ :  $\bar{\nu} = 1545$  (C=C), 1637 (C=N), 1693 (C=O), 2846-2918 (Al-H).  $^1\text{H}$  NMR (400 MHz, DMSO- $d_6$ ):  $\delta_{\text{H}} = 0.84$  (t, 6H,  $J = 8$  Hz,  $2\times\text{CH}_3$ ), 1.23-1.29 (m, 60H,  $30\times\text{CH}_2$ ), 1.94 (bs, 4H,  $2\times\text{NCH}_2\text{CH}_2$ ), 4.59-4.69 (m, 4H,  $2\times\text{NCH}_2$ ), 8.18 (d, 0.5H,  $J = 8$  Hz, Ar-H), 8.29 (s, 0.25H, H-C=N), 8.43 (d, 0.5H,  $J = 8$  Hz, Ar-H), 8.46 (d, 1.5H,  $J = 8$  Hz, Ar-H), 8.56 (d,



1.5H,  $J = 8$  Hz, Ar-H), 8.63 (s, 0.75H, H-C=N), 9.02 (d, 0.5H,  $J = 8$  Hz, Ar-H), 9.14 (d, 1.5H,  $J = 4$  Hz, Ar-H), 9.28 (d, 0.5H,  $J = 4$  Hz, Ar-H), 9.36 (d, 1.5H,  $J = 4$  Hz, Ar-H), 13.18 (s, 1H, CONH).  $^{13}\text{C}$  NMR (100 MHz, DMSO- $d_6$ ):  $\delta_{\text{C}} = 14.44$  ( $2\times\text{CH}_3$ ), 22.57, 25.86, 28.87, 29.18, 29.27, 29.39, 29.48, 31.16, 31.76 ( $24\times\text{CH}_2$ ), 60.97, 61.65 ( $2\times\text{NCH}_2$ ), 125.26, 125.41, 126.90, 127.72, 144.93, 145.34, 145.65, 146.35, 146.98, 149.14 (Ar-C), 160.33, 160.40 (C=N, C=O).  $^{31}\text{P}$  NMR (162 MHz, DMSO- $d_6$ ):  $\delta_{\text{P}} = (-153.29)$  to  $(-135.70)$  (m, 2P,  $2\times\text{PF}_6$ ).  $^{19}\text{F}$  NMR (377 MHz, DMSO- $d_6$ ):  $\delta_{\text{F}} = -69.18$  (d, 12F,  $2\times\text{PF}_6$ ). HRMS (ESI)  $m/z = 1022.5929$  [ $\text{M}^+$ ].

***Characterization of 1-octadecyl-4-((2-(1-octadecylpyridin-1-ium-4-carbonyl)hydrazono)methyl)pyridin-1-ium tetrafluoroborate (35)***

It was obtained as yellow crystals in 90% yield; mp: 189-190 °C. FT-IR (KBr),  $\text{cm}^{-1}$ :  $\bar{\nu} = 1549$  (C=C), 1642 (C=N), 1693 (C=O), 2846-2914 (Al-H).  $^1\text{H}$  NMR (400 MHz, DMSO- $d_6$ ):  $\delta_{\text{H}} = 0.84$  (t, 6H,  $J = 8$  Hz,  $2\times\text{CH}_3$ ), 1.23-1.29 (m, 60H,  $30\times\text{CH}_2$ ), 1.94 (bs, 4H,  $2\times\text{NCH}_2\text{CH}_2$ ), 4.59-4.69 (m, 4H,  $2\times\text{NCH}_2$ ), 8.18 (d, 0.5H,  $J = 8$  Hz, Ar-H), 8.29 (s, 0.25H, H-C=N), 8.43 (d, 0.5H,  $J = 8$  Hz, Ar-H), 8.46 (d, 1.5H,  $J = 8$  Hz, Ar-H), 8.56 (d, 1.5H,  $J = 8$  Hz, Ar-H), 8.63 (s, 0.75H, H-C=N), 9.02 (d, 0.5H,  $J = 8$  Hz, Ar-H), 9.14 (d, 1.5H,  $J = 4$  Hz, Ar-H), 9.28 (d, 0.5H,  $J = 4$  Hz, Ar-H), 9.36 (d, 1.5H,  $J = 4$  Hz, Ar-H), 13.18 (s, 1H, CONH).  $^{13}\text{C}$  NMR (100 MHz, DMSO- $d_6$ ):  $\delta_{\text{C}} = 14.44$  ( $2\times\text{CH}_3$ ), 22.57, 25.86, 28.87, 29.18, 29.27, 29.39, 29.48, 31.16, 31.76 ( $24\times\text{CH}_2$ ), 60.97, 61.65 ( $2\times\text{NCH}_2$ ), 125.26, 125.41, 126.90, 127.72, 144.93, 145.34, 145.65, 146.35, 146.98, 149.14 (Ar-C), 160.33, 160.40 (C=N, C=O).  $^{11}\text{B}$  NMR (128 MHz, DMSO- $d_6$ ):  $\delta_{\text{B}} = (-1.24)$  to  $(-1.42)$  (m, 2B,  $2\times\text{BF}_4$ ).  $^{19}\text{F}$  NMR (377 MHz, DMSO- $d_6$ ):  $\delta_{\text{F}} = -148.13, -148.22$  (2d, 8F,  $2\times\text{BF}_4$ ). HRMS (ESI)  $m/z = 906.6703$  [ $\text{M}^+$ ].

***Characterization of 1-octadecyl-4-((2-(1-octadecylpyridin-1-ium-4-carbonyl)hydrazono)methyl)pyridin-1-ium trifluoroacetate (36)***

It was obtained as yellow crystals in 94% yield; mp: 165-166 °C. FT-IR (KBr),  $\text{cm}^{-1}$ :  $\bar{\nu} = 1548$  (C=C), 1637 (C=N), 1689 (C=O), 2847-2919 (Al-H).  $^1\text{H}$  NMR (400 MHz, DMSO- $d_6$ ):  $\delta_{\text{H}} = 0.84$  (t, 6H,  $J = 8$  Hz,  $2\times\text{CH}_3$ ), 1.23-1.29 (m, 60H,  $30\times\text{CH}_2$ ), 1.94 (bs, 4H,  $2\times\text{NCH}_2\text{CH}_2$ ), 4.59-4.69 (m, 4H,  $2\times\text{NCH}_2$ ), 8.18 (d, 0.5H,  $J = 8$  Hz, Ar-H), 8.29 (s,



0.25H, **H-C=N**), 8.43 (d, 0.5H,  $J = 8$  Hz, Ar-**H**), 8.46 (d, 1.5H,  $J = 8$  Hz, Ar-**H**), 8.56 (d, 1.5H,  $J = 8$  Hz, Ar-**H**), 8.63 (s, 0.75H, **H-C=N**), 9.02 (d, 0.5H,  $J = 8$  Hz, Ar-**H**), 9.14 (d, 1.5H,  $J = 4$  Hz, Ar-**H**), 9.28 (d, 0.5H,  $J = 4$  Hz, Ar-**H**), 9.36 (d, 1.5H,  $J = 4$  Hz, Ar-**H**), 13.18 (s, 1H, CON**H**).  $^{13}\text{C}$  NMR (100 MHz, DMSO- $d_6$ ):  $\delta_{\text{C}} = 14.44$  ( $2\times\text{CH}_3$ ), 22.57, 25.86, 28.87, 29.18, 29.27, 29.39, 29.48, 31.16, 31.76 ( $24\times\text{CH}_2$ ), 60.97, 61.65 ( $2\times\text{NCH}_2$ ), 125.26, 125.41, 126.90, 127.72, 144.93, 145.34, 145.65, 146.35, 146.98, 149.14 (Ar-**C**), 160.33, 160.40 (**C=N**, **C=O**).  $^{19}\text{F}$  NMR (377 MHz, DMSO- $d_6$ ):  $\delta_{\text{F}} = -73.50$  (s, 6F,  $2\times\text{CF}_3$ ). HRMS (ESI)  $m/z = 958.6346$  [ $\text{M}^+$ ].

### 3. Spectroscopic Data

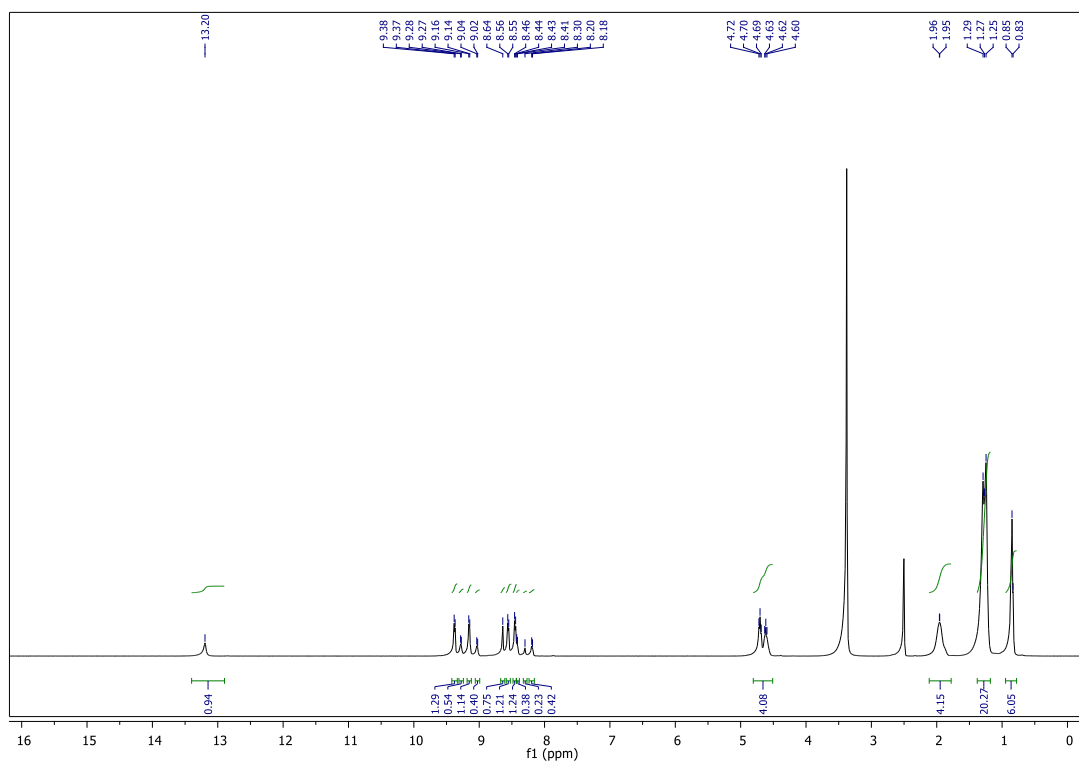

Figure S1: <sup>1</sup>H NMR of Compound 9

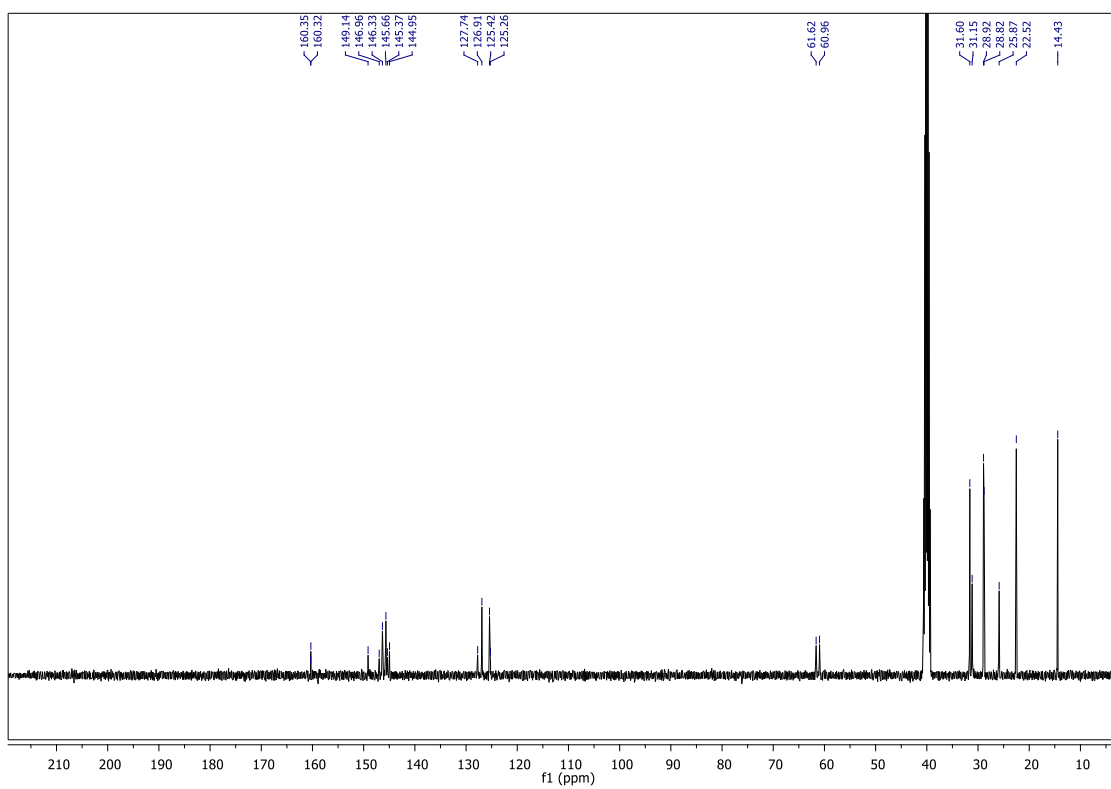

Figure S2: <sup>13</sup>C NMR of Compound 9

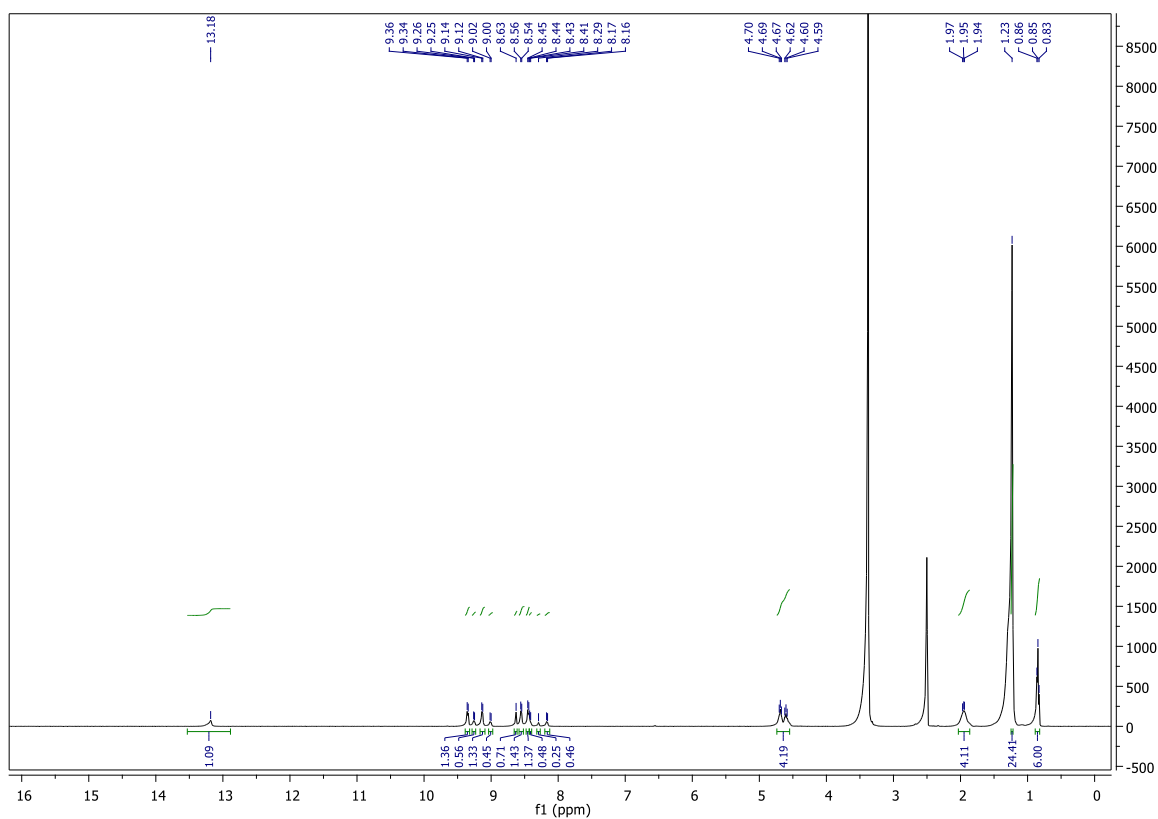

**Figure S3: <sup>1</sup>H NMR of Compound 10**

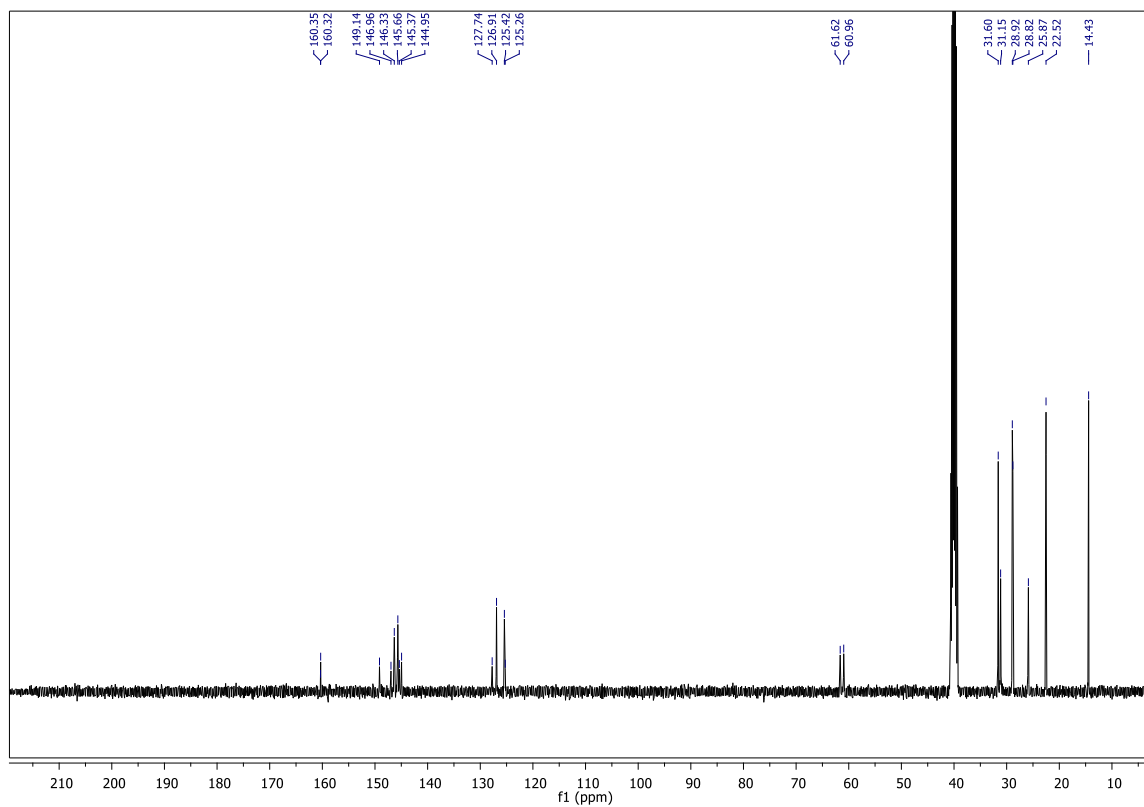

**Figure S4: <sup>13</sup>C NMR of Compound 10**

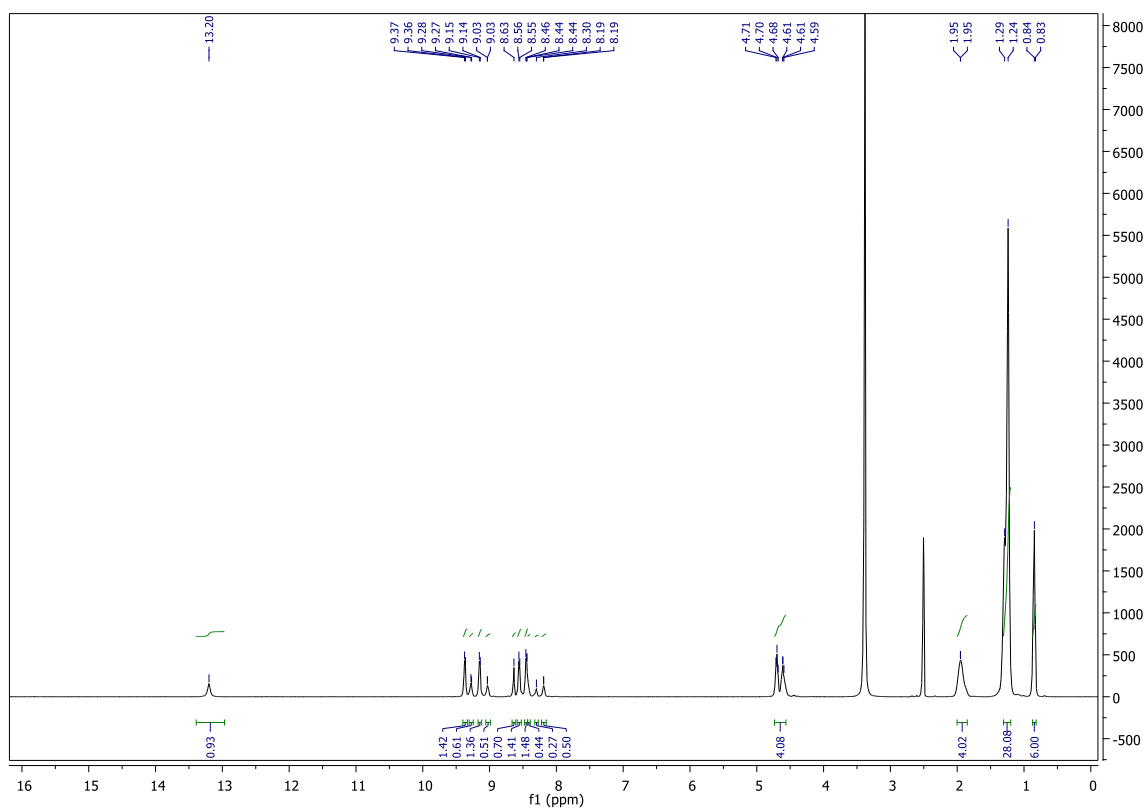

**Figure S5:  $^1\text{H}$  NMR of Compound 11**

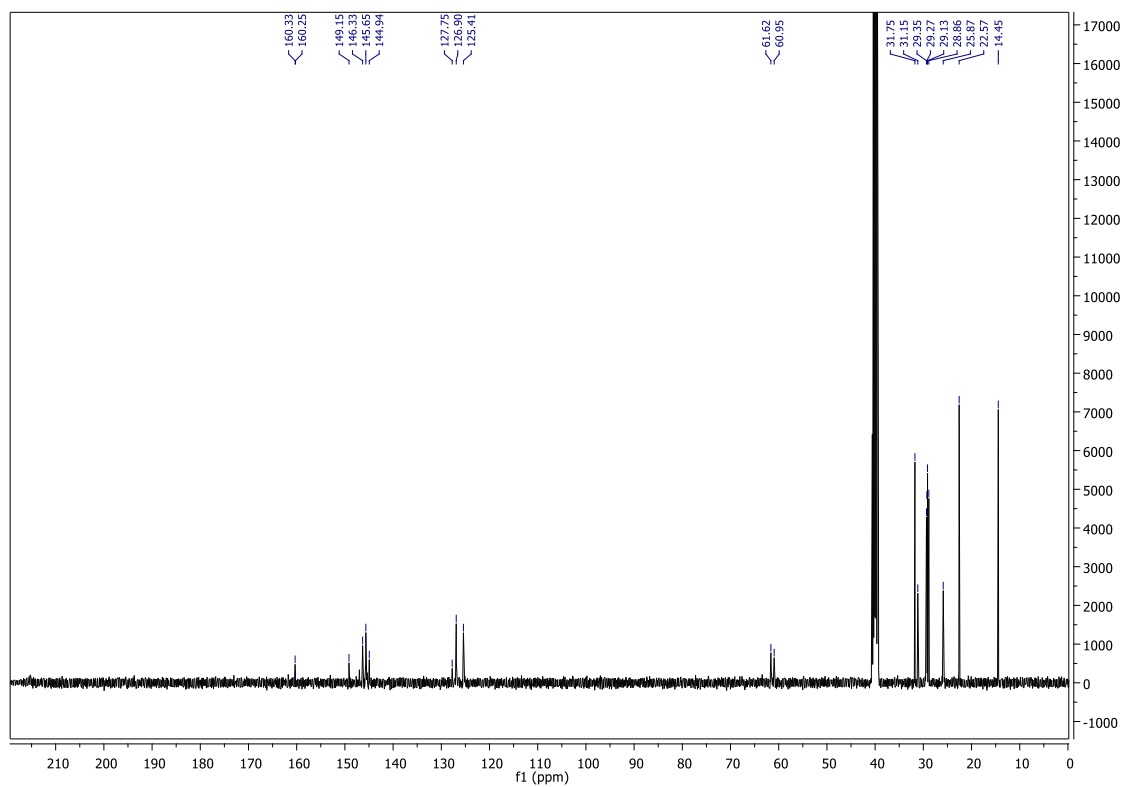

**Figure S6:  $^{13}\text{C}$  NMR of Compound 11**

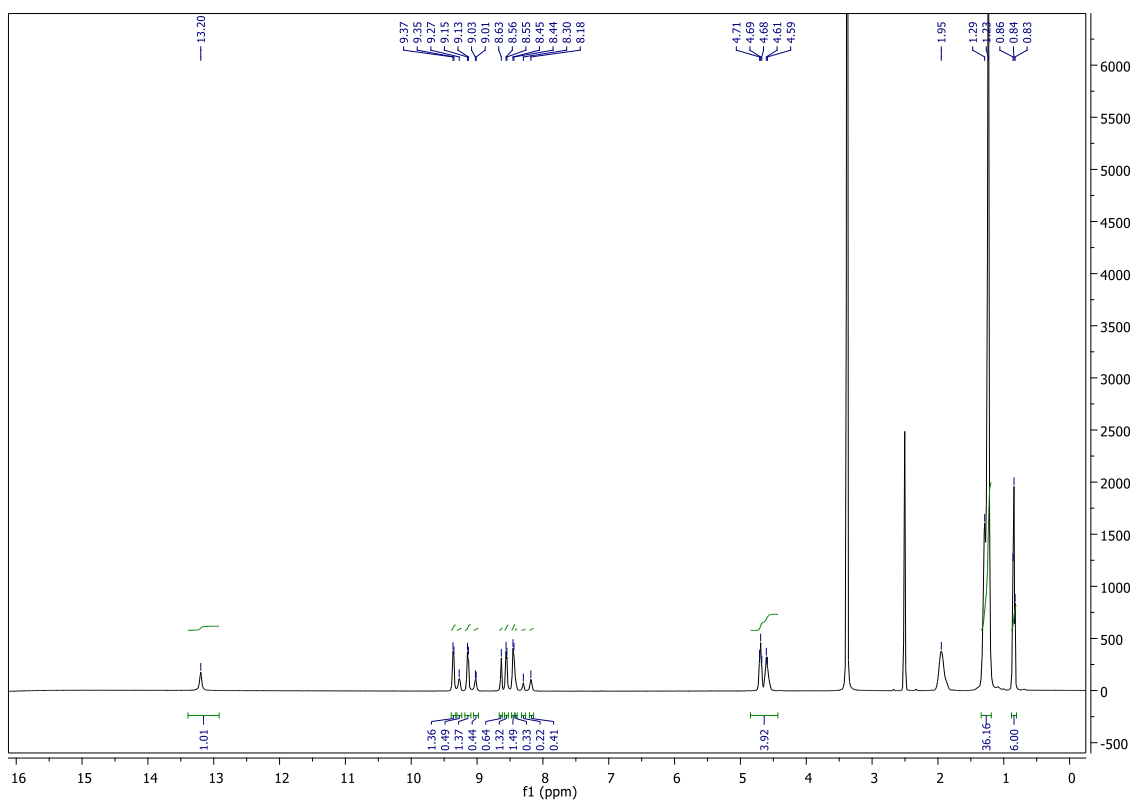

Figure S7:  $^1\text{H}$  NMR of Compound 12

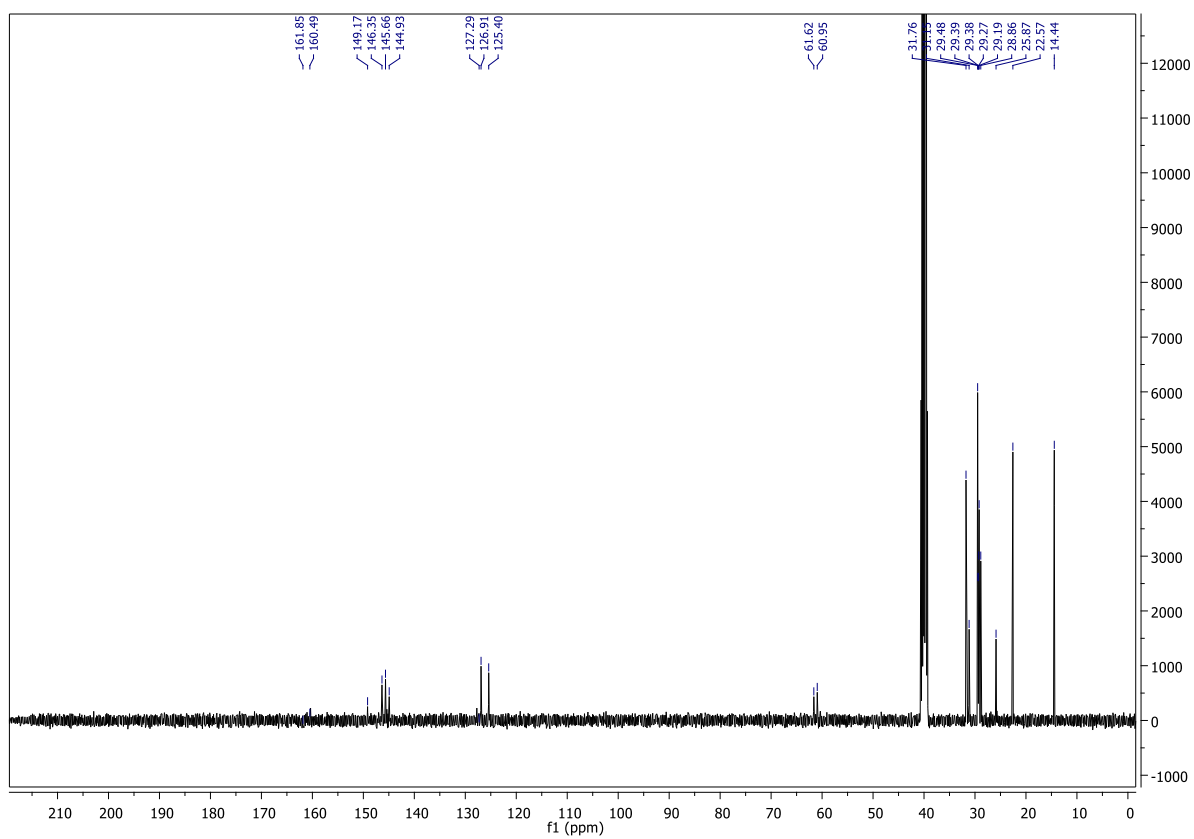

Figure S8:  $^{13}\text{C}$  NMR of Compound 12

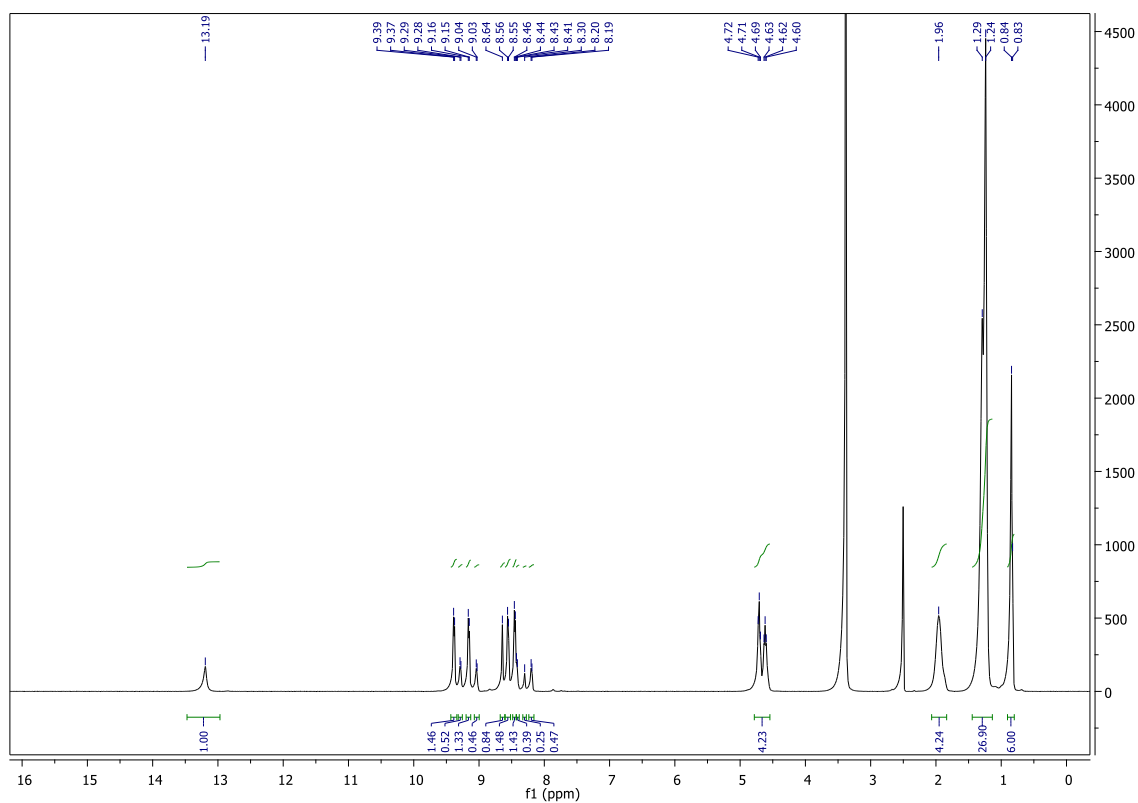

Figure S9:  $^1\text{H}$  NMR of Compound 13

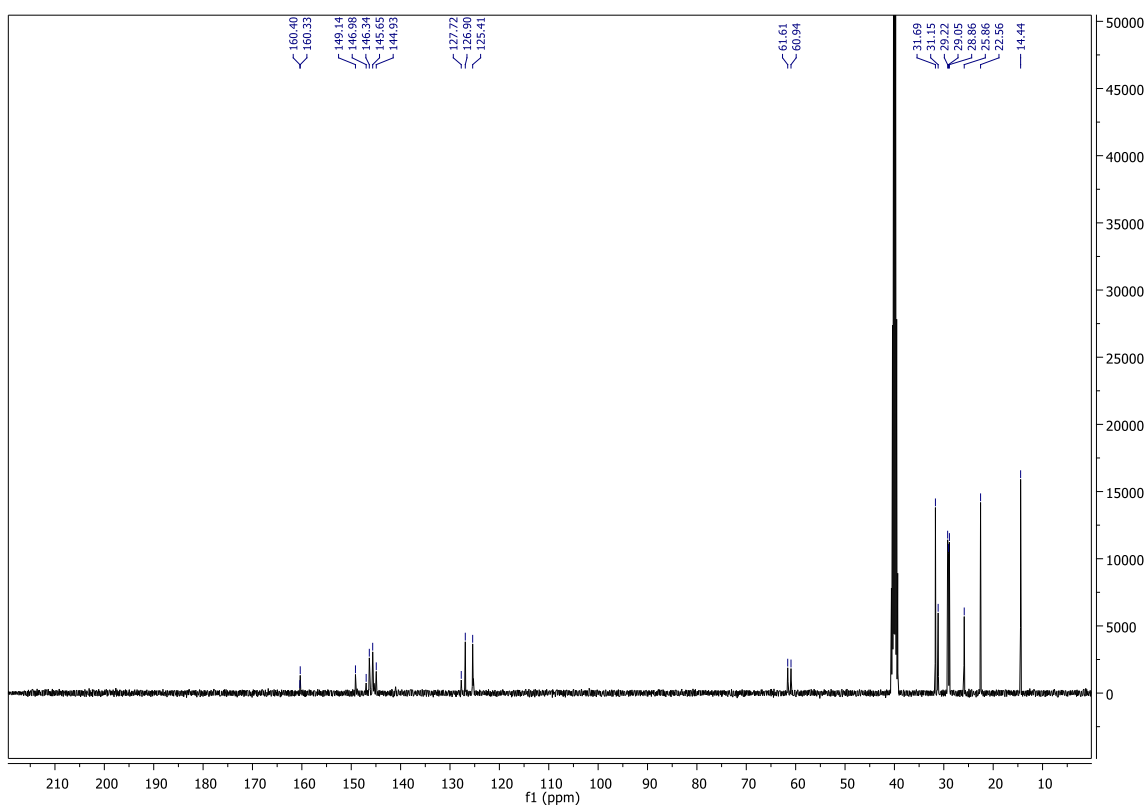

Figure S10:  $^{13}\text{C}$  NMR of Compound 13

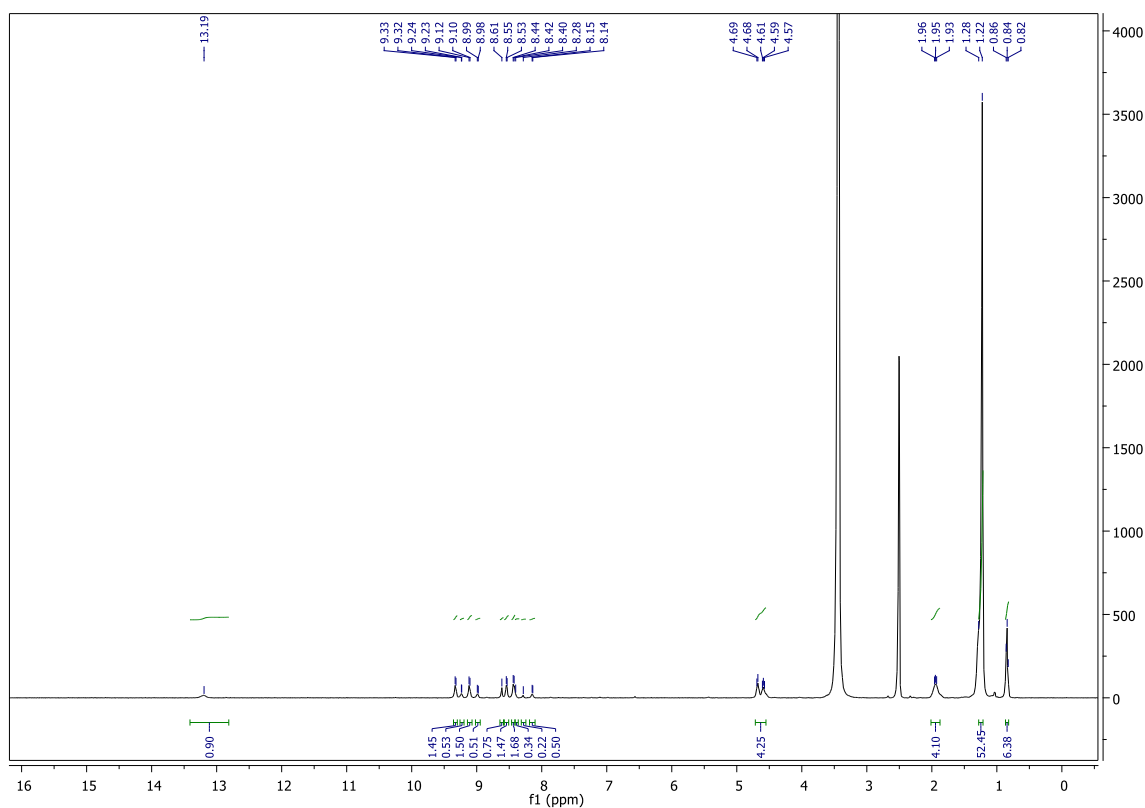

Figure S11: <sup>1</sup>H NMR of Compound 14

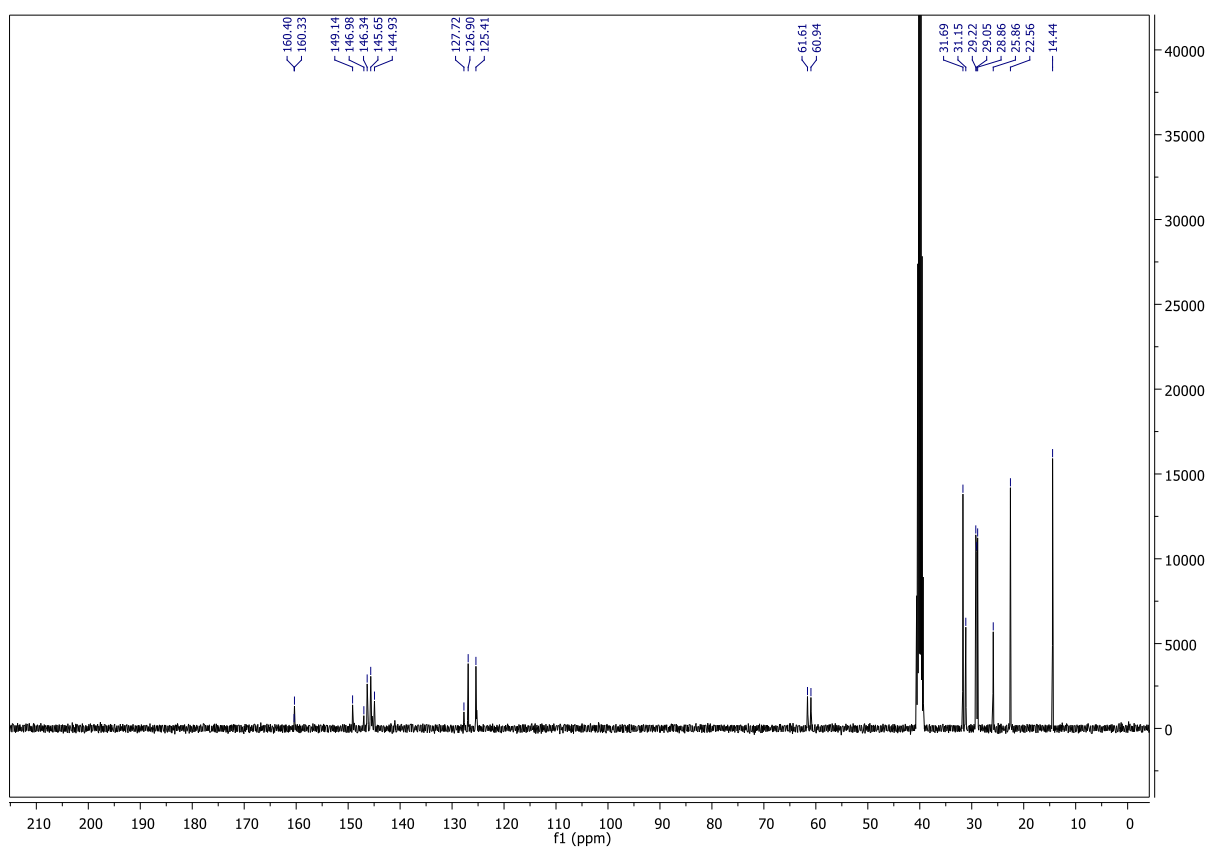

Figure S12: <sup>13</sup>C NMR of Compound 14



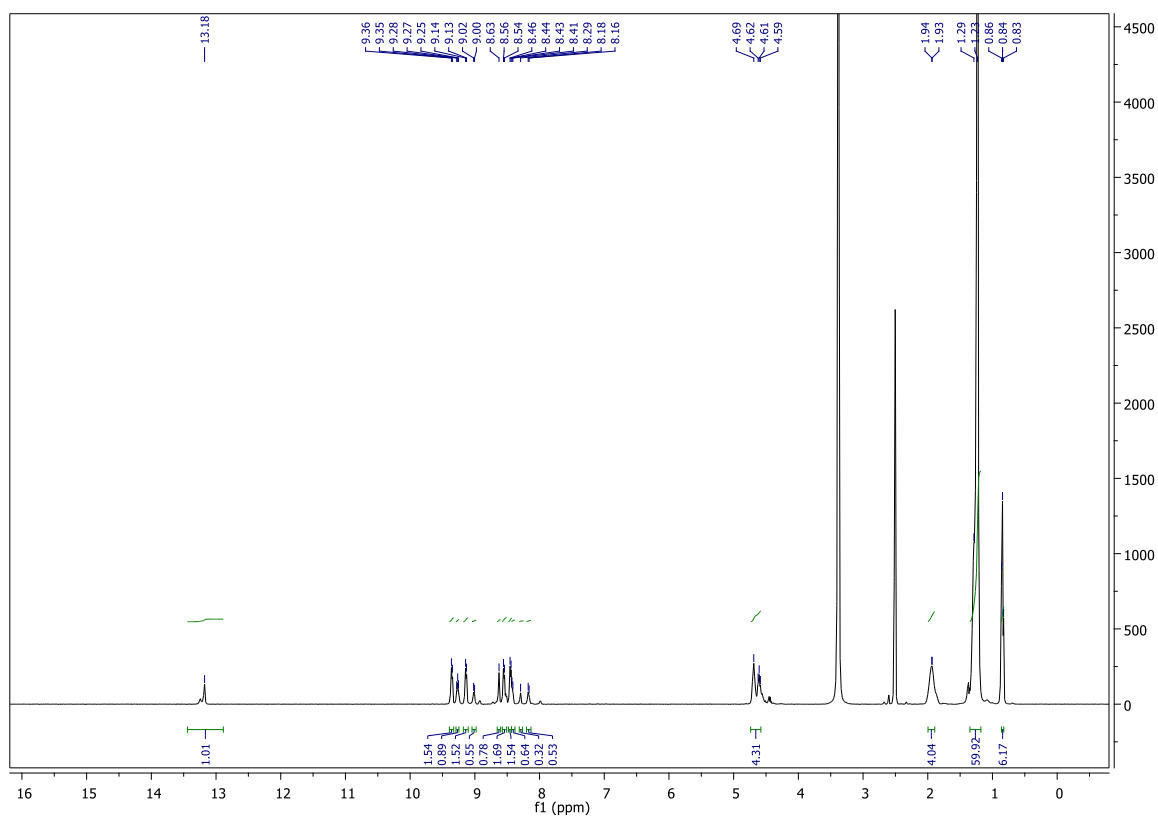

Figure S13:  $^1\text{H}$  NMR of Compound 15

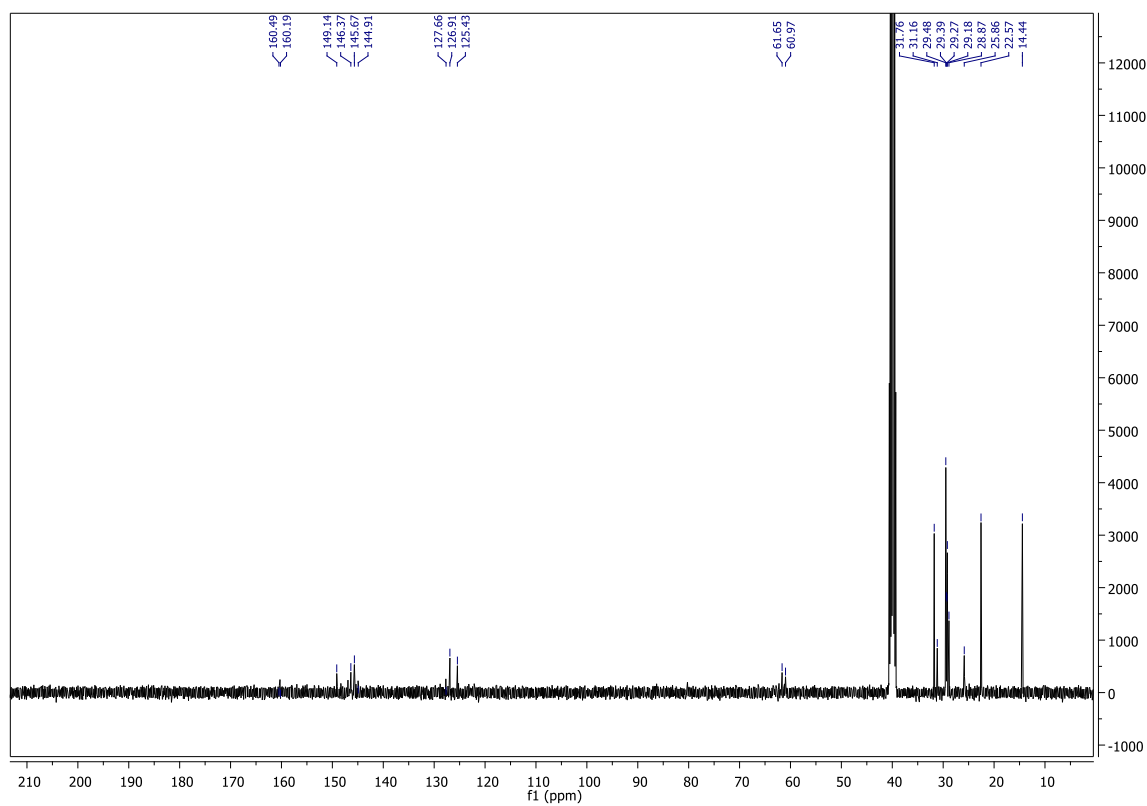

Figure S14:  $^{13}\text{C}$  NMR of Compound 15

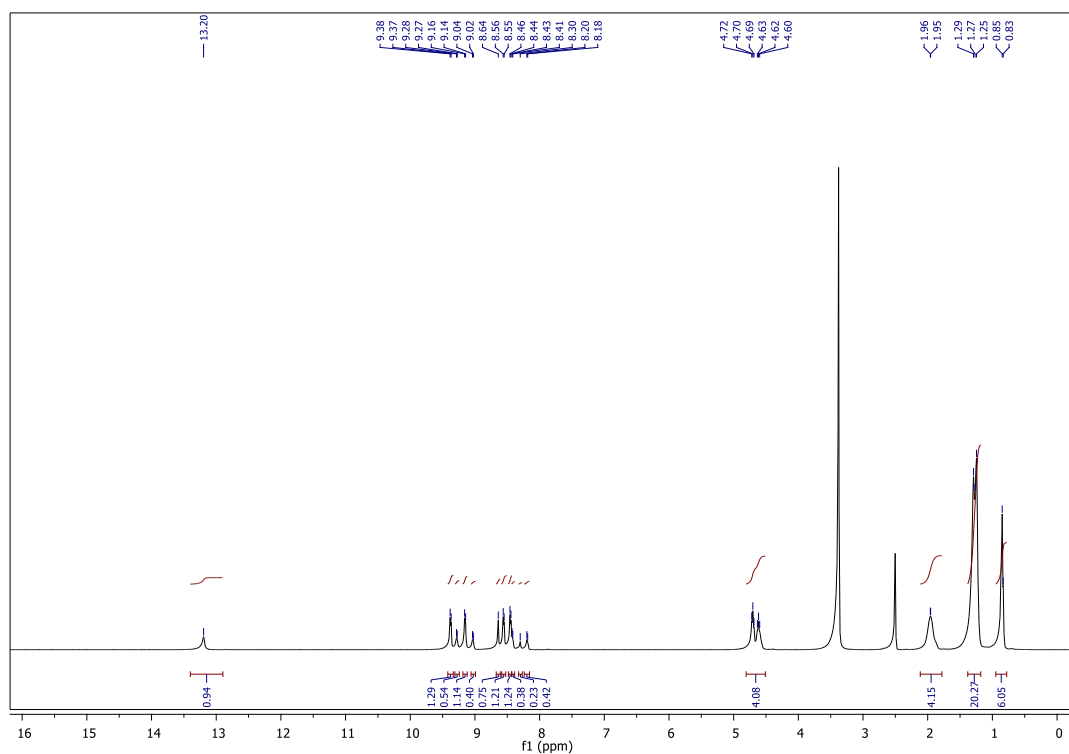

Figure S15: <sup>1</sup>H NMR of Compound 16

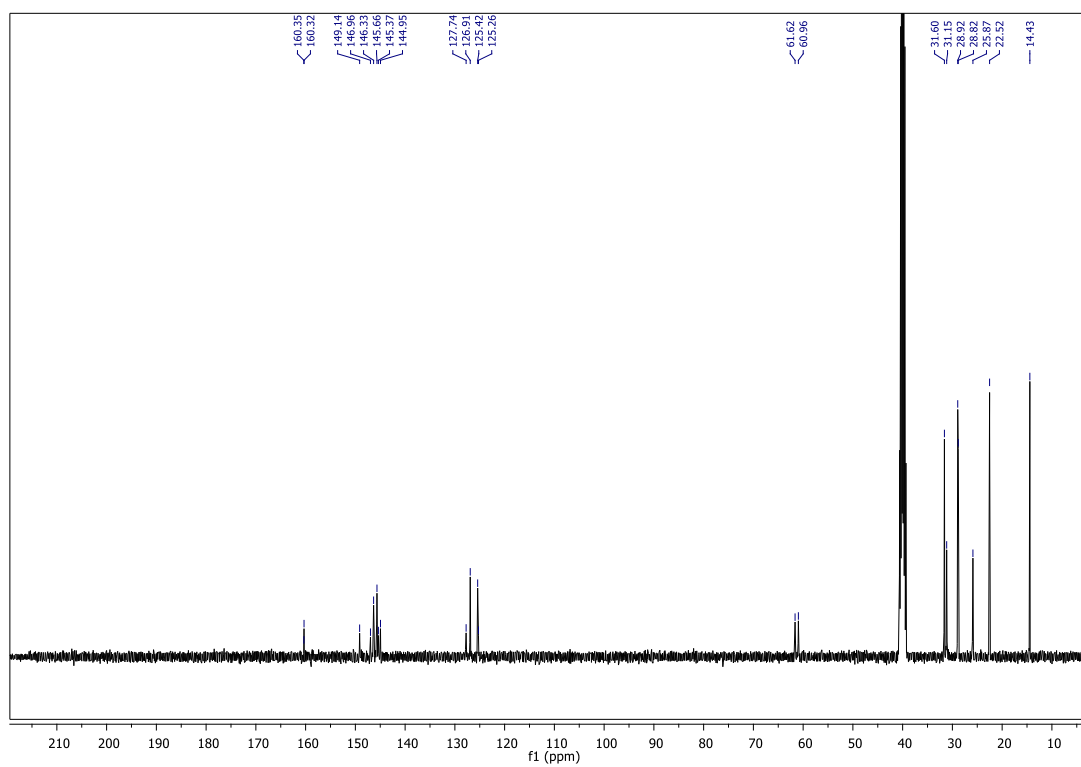

Figure S16: <sup>13</sup>C NMR of Compound 16

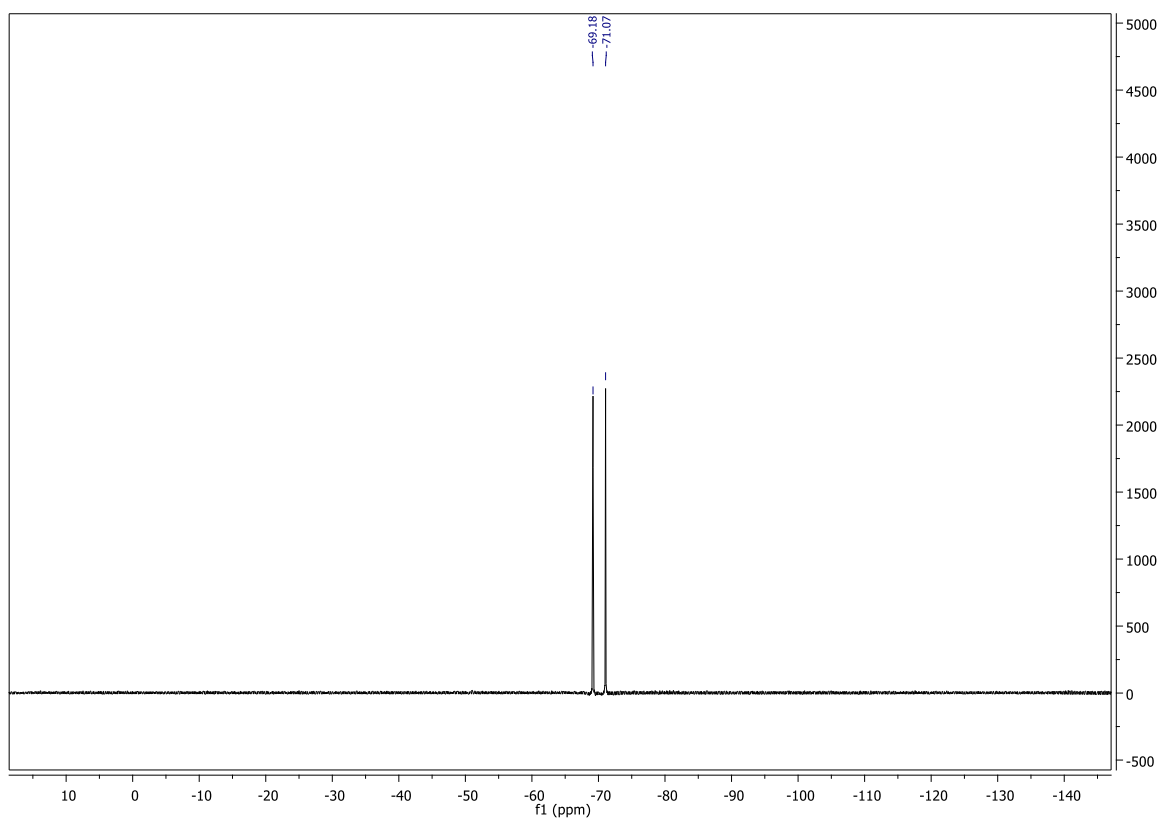

Figure S17:  $^{19}\text{F}$  NMR of Compound 16

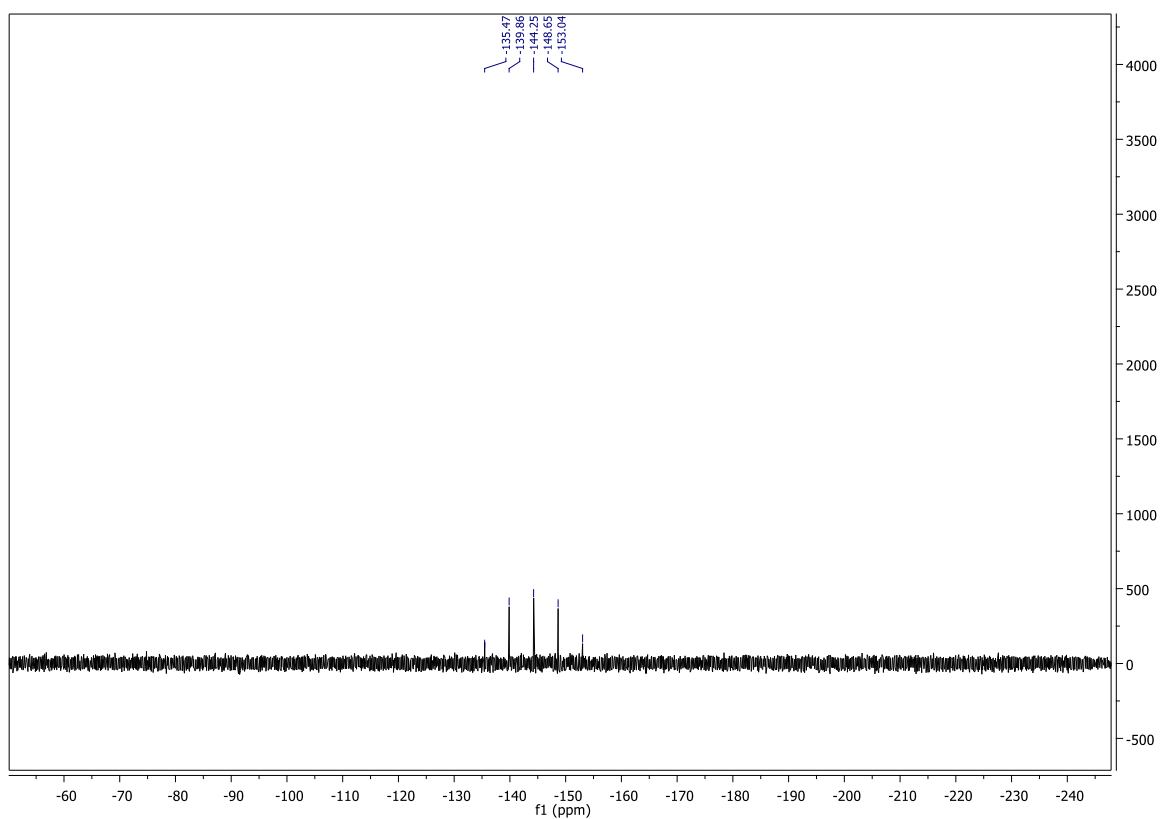

Figure S18:  $^{31}\text{P}$  NMR of Compound 16

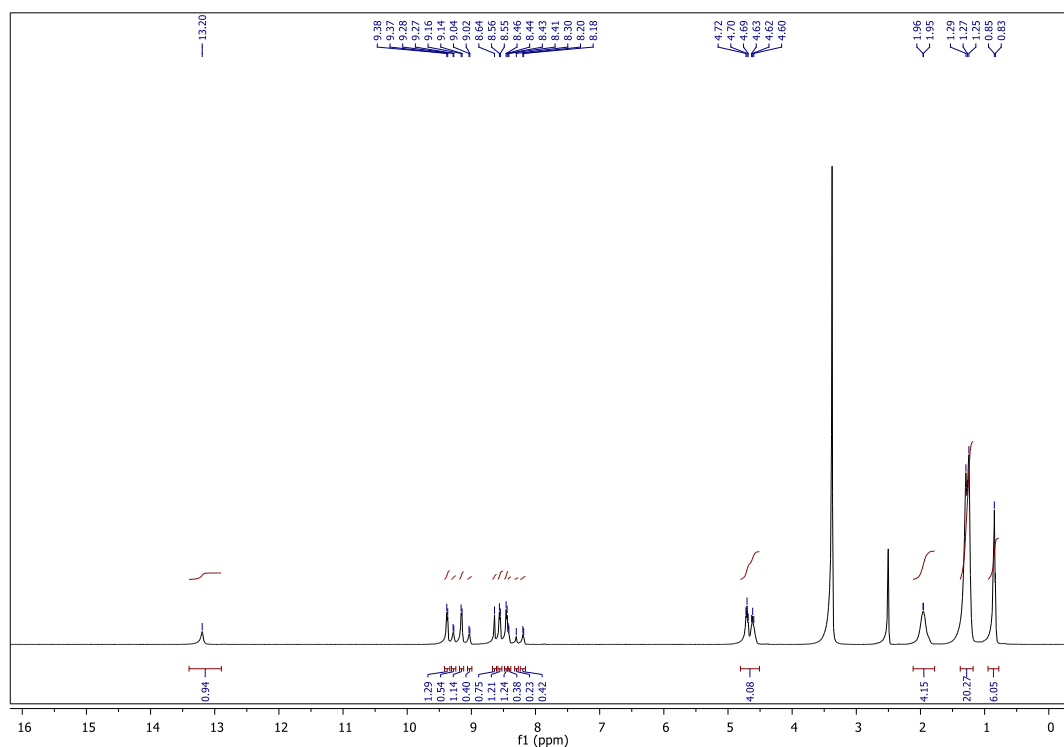

Figure S19: <sup>1</sup>H NMR of Compound 17

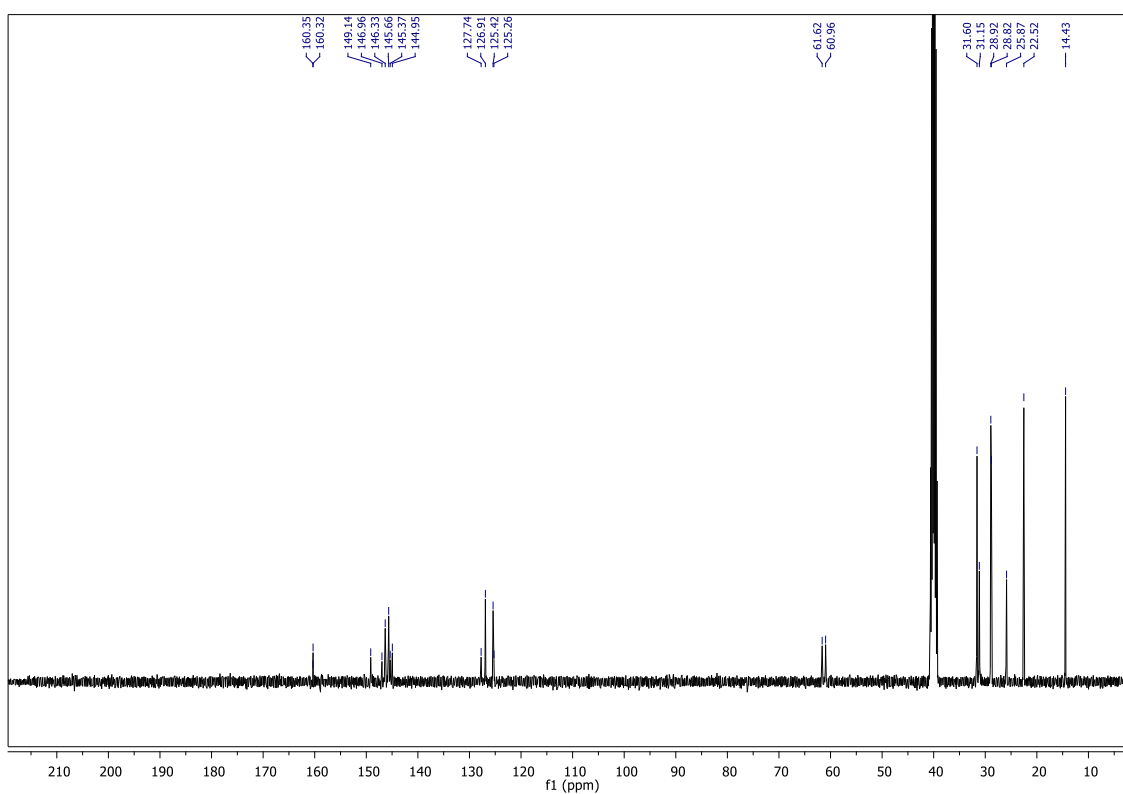

Figure S20: <sup>13</sup>C NMR of Compound 17

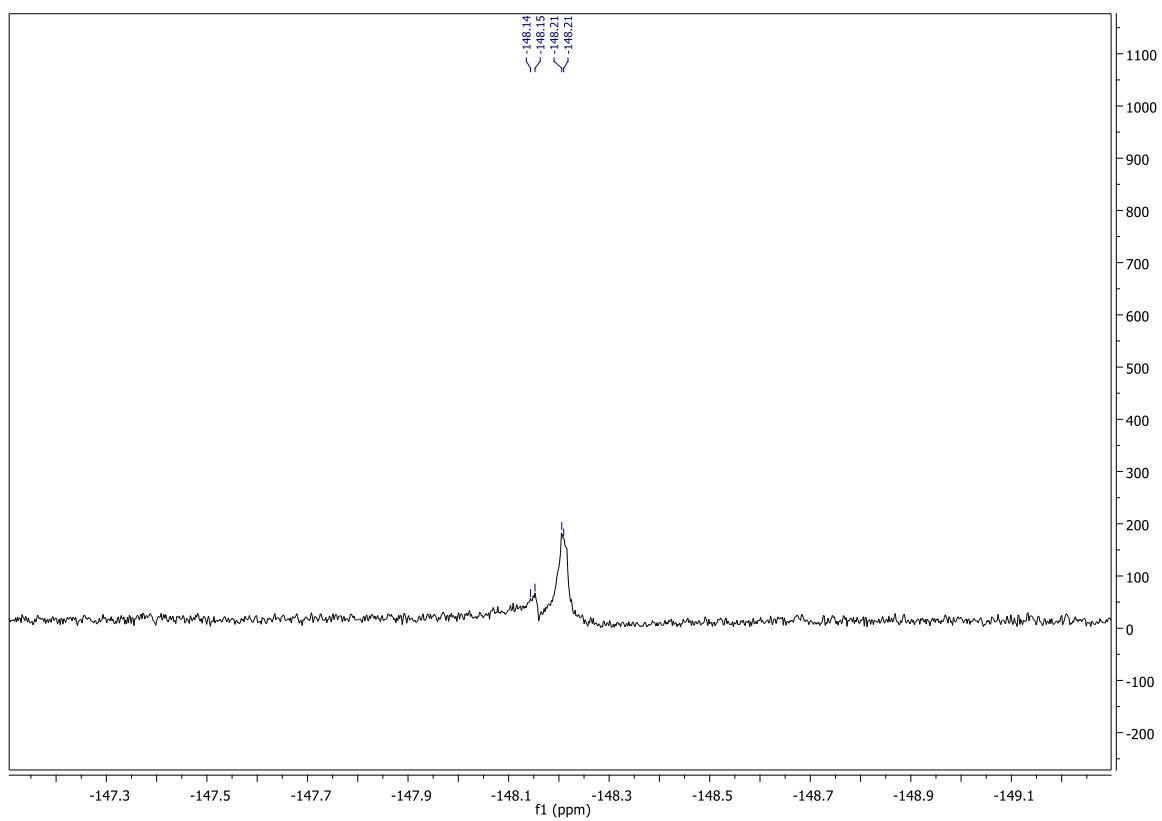

**Figure S21:  $^{19}\text{F}$  NMR of Compound 17**

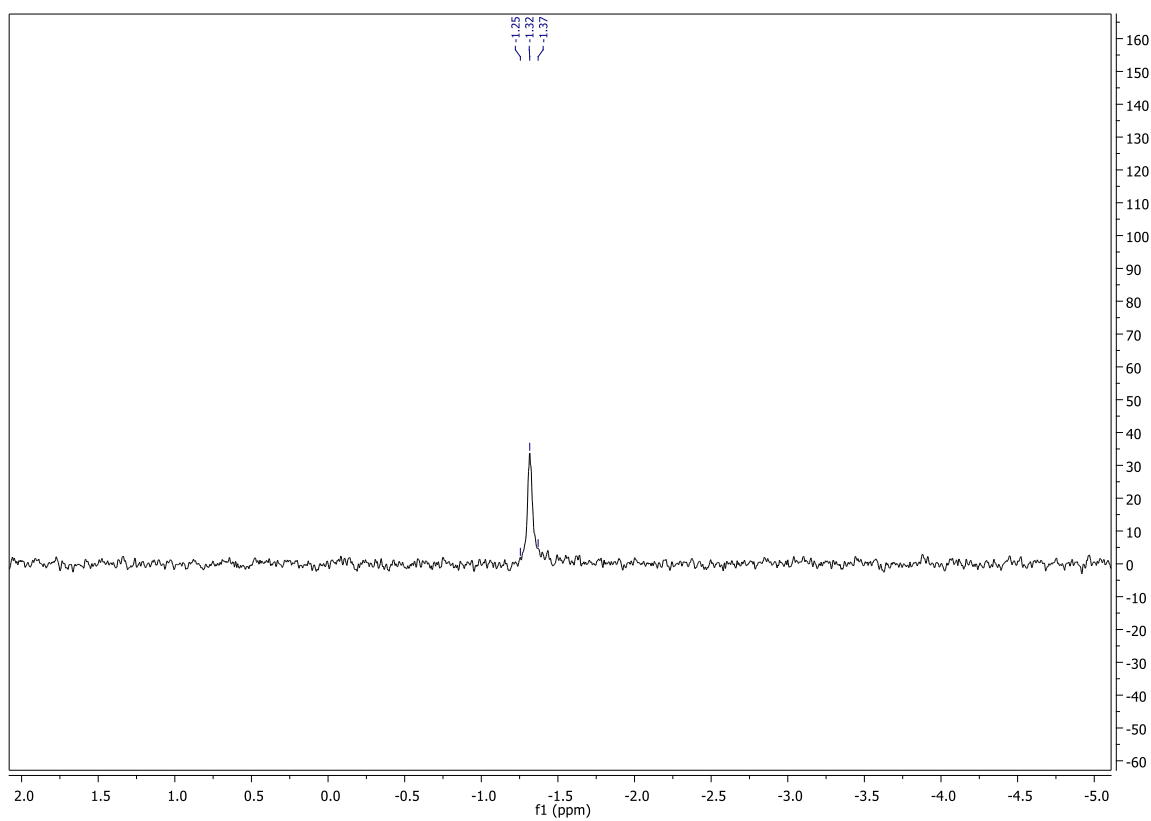

**Figure S22:  $^{11}\text{B}$  NMR of Compound 17**

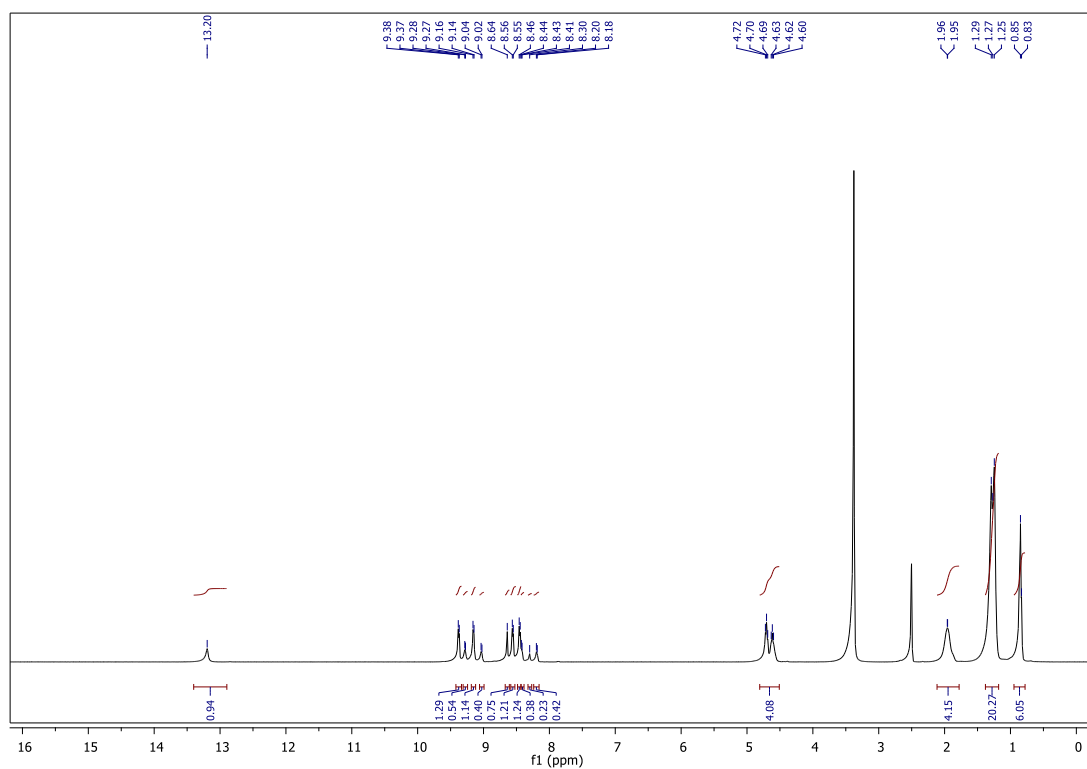

Figure S23: <sup>1</sup>H NMR of Compound 18

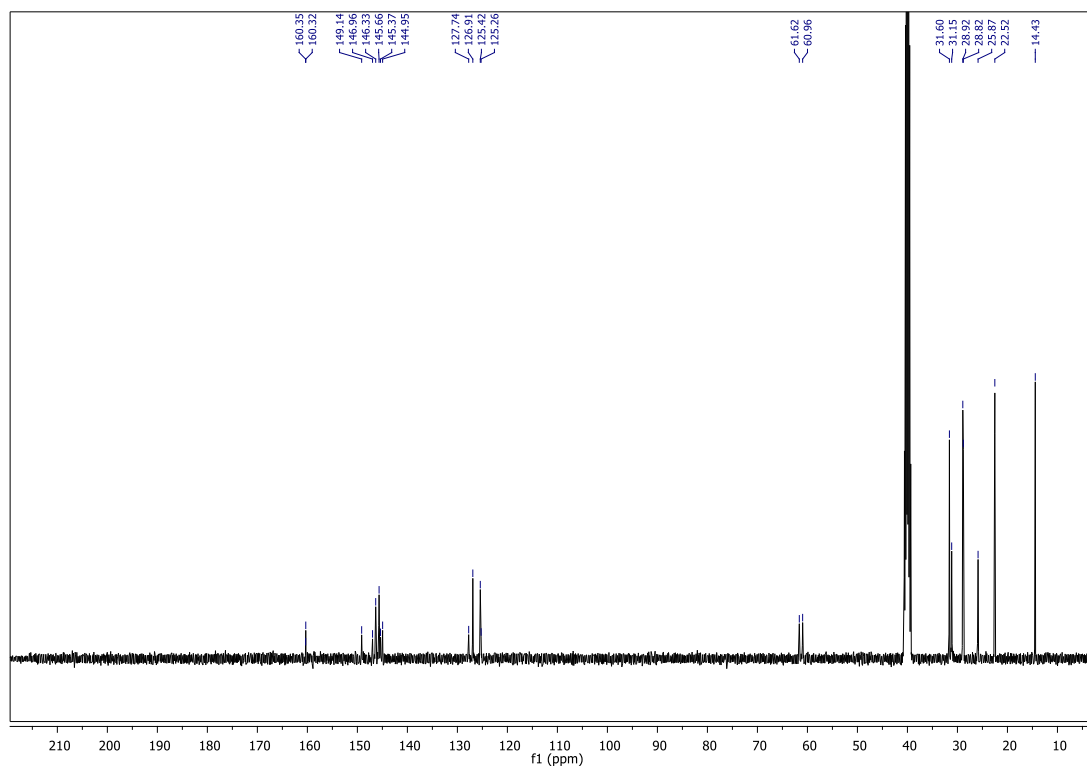

Figure S24: <sup>13</sup>C NMR of Compound 18

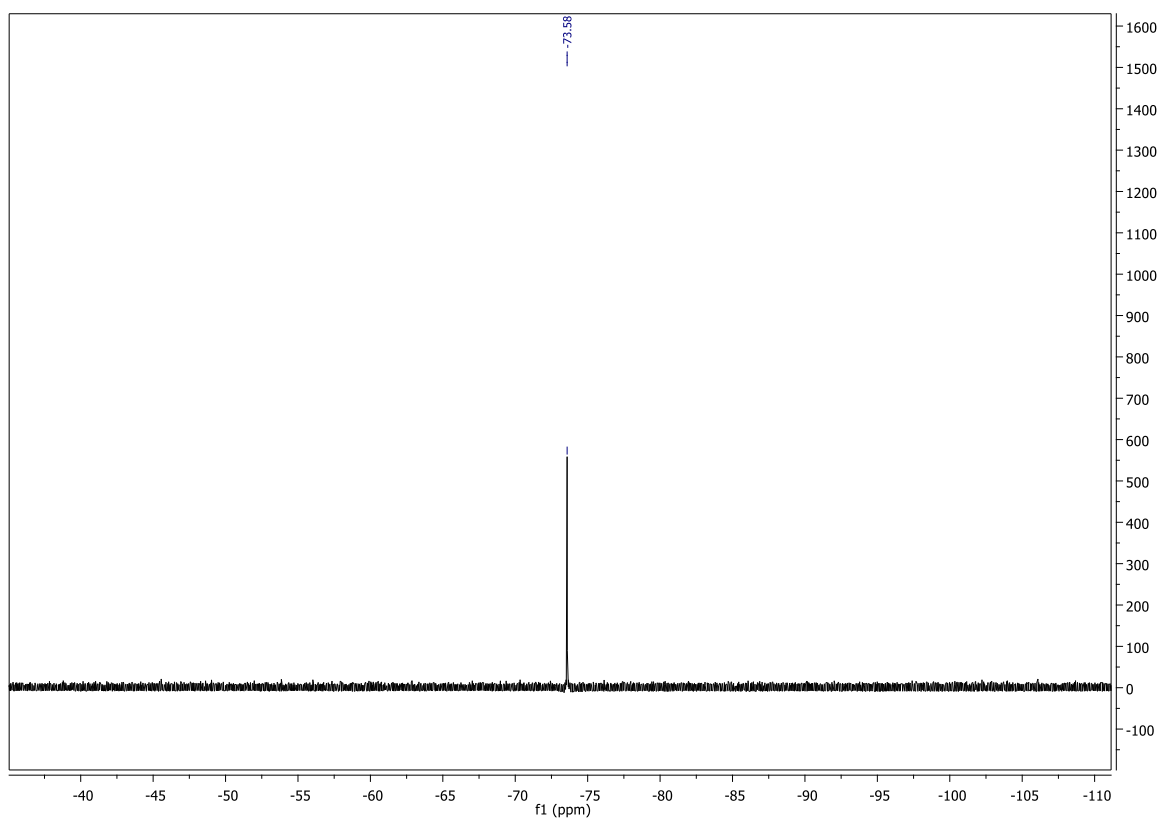

Figure S25:  $^{19}\text{F}$  NMR of Compound 18

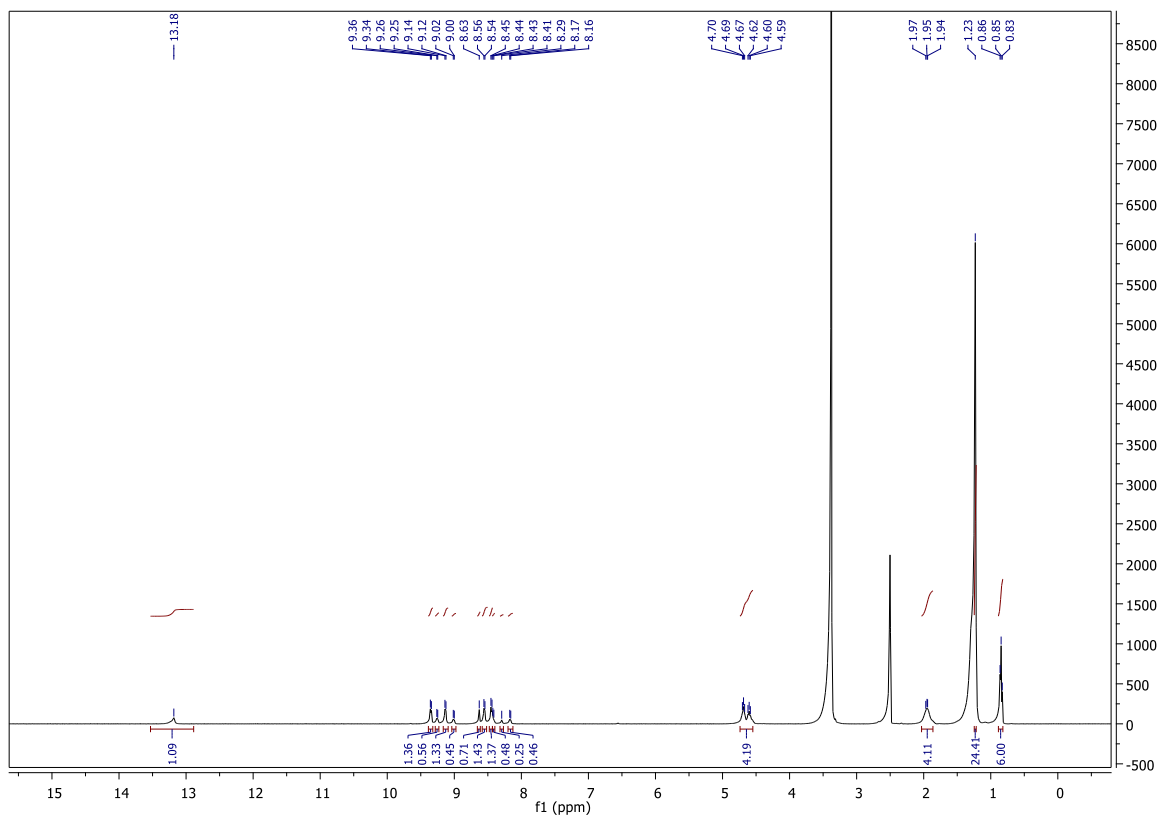

Figure S26:  $^1\text{H}$  NMR of Compound 19



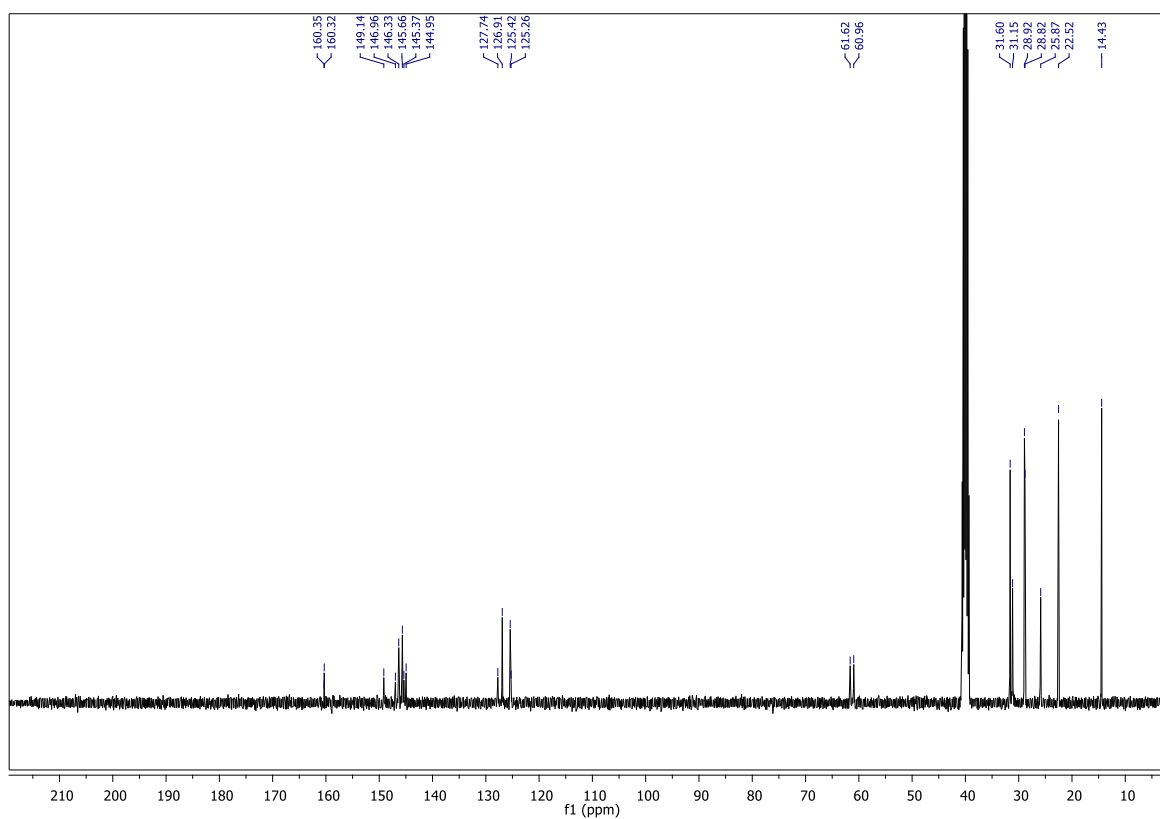

Figure S27: <sup>13</sup>C NMR of Compound 19

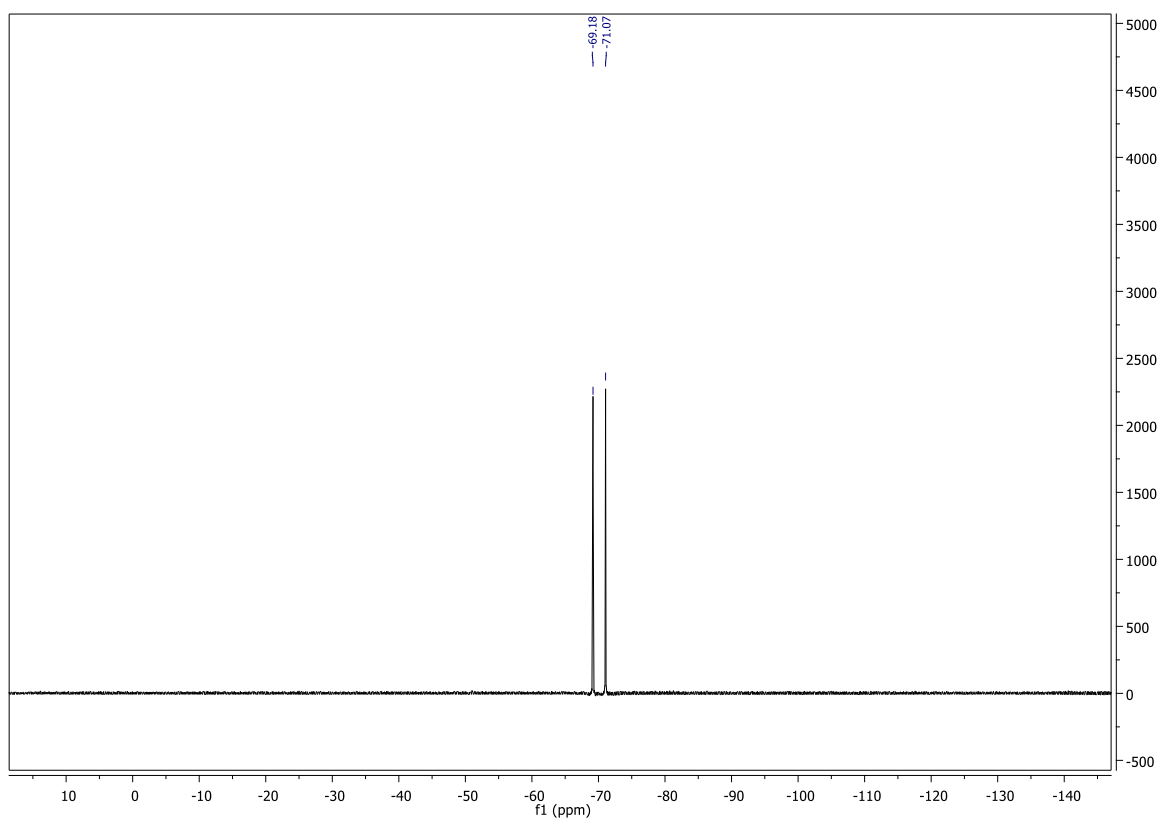

Figure S28: <sup>19</sup>F NMR of Compound 19

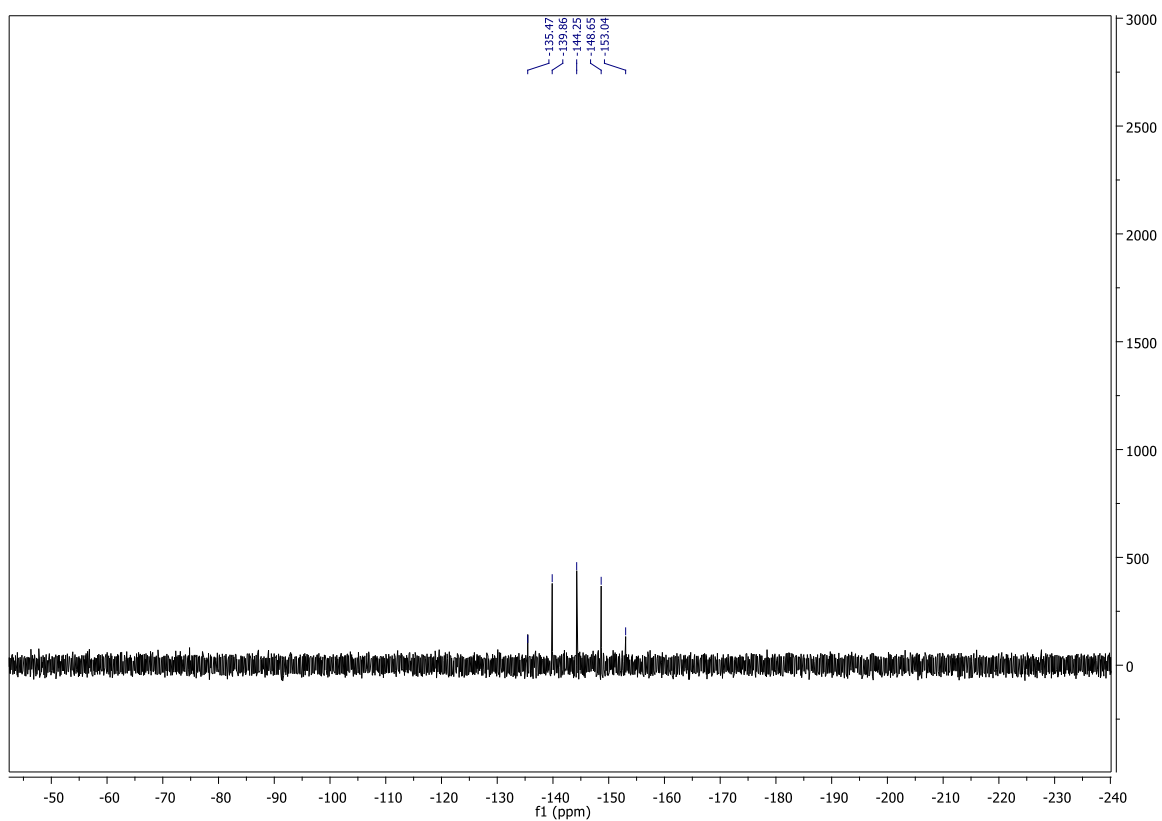

Figure S29:  $^{31}\text{P}$  NMR of Compound 19

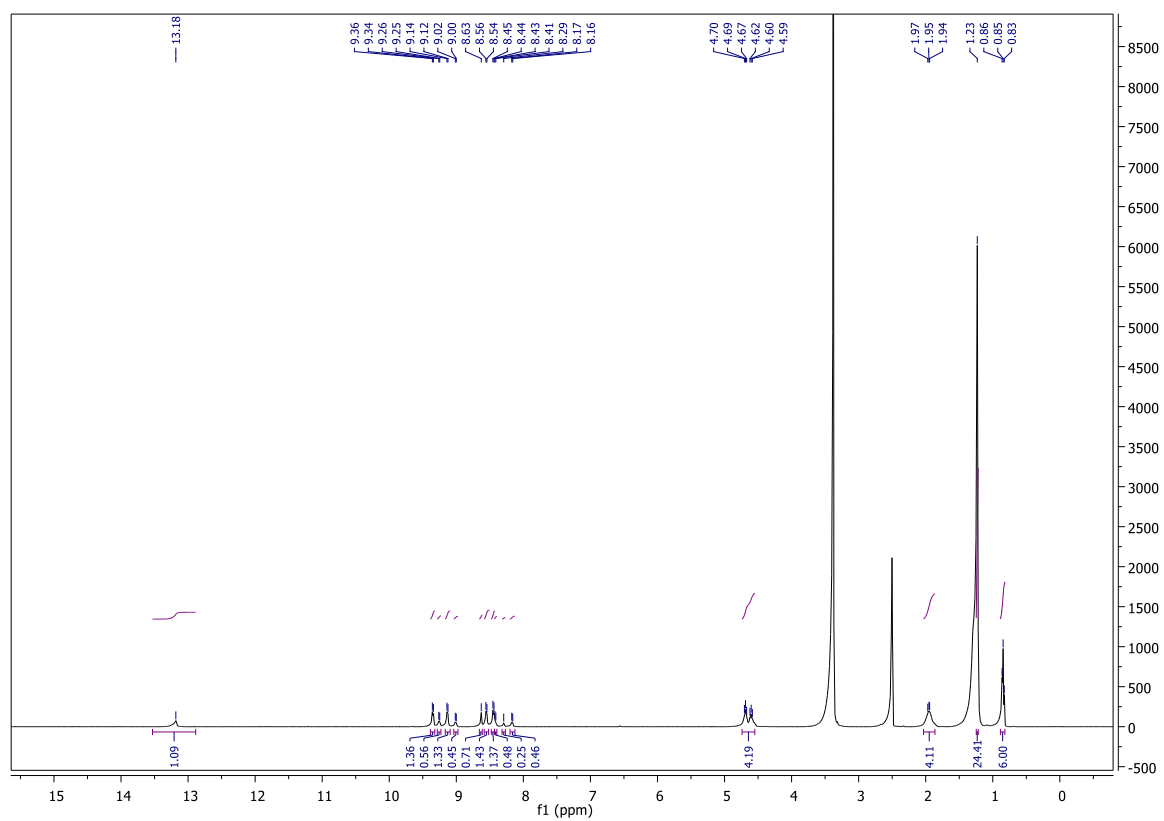

Figure S30:  $^1\text{H}$  NMR of Compound 20



Figure S31: <sup>13</sup>C NMR of Compound 20

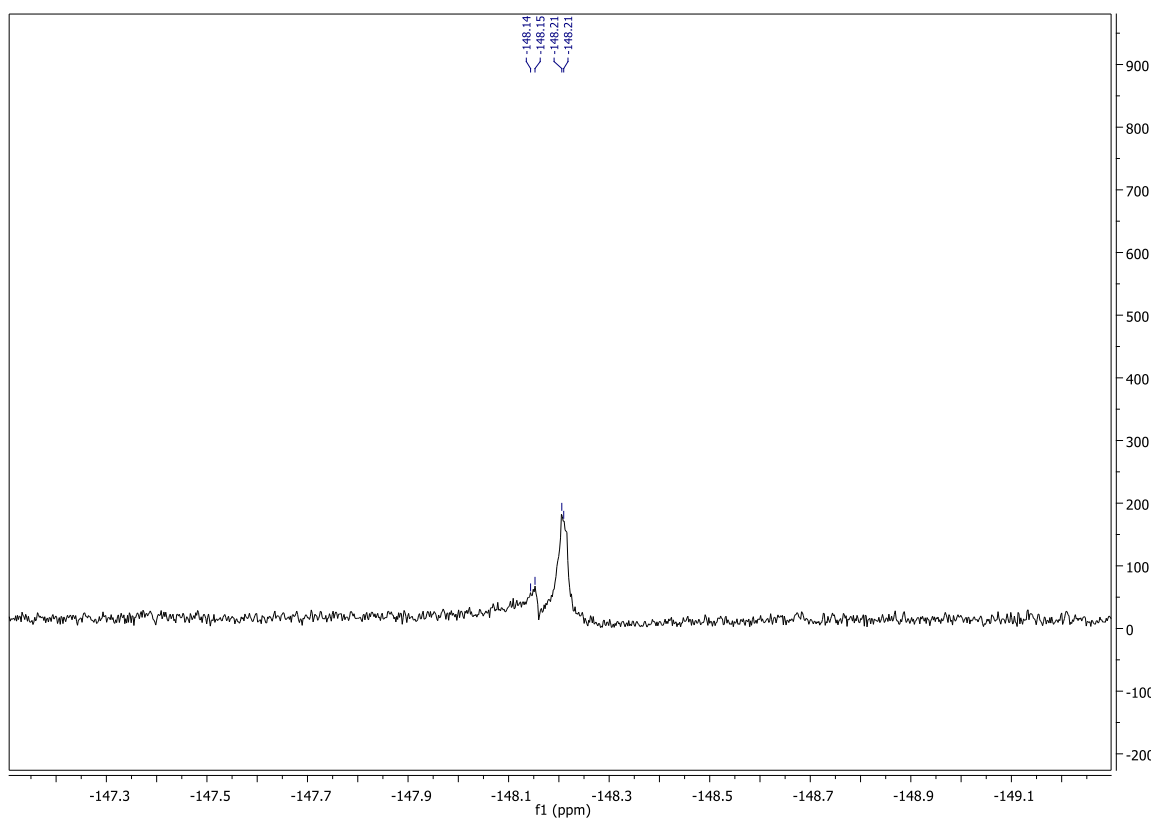

Figure S32: <sup>19</sup>F NMR of Compound 20

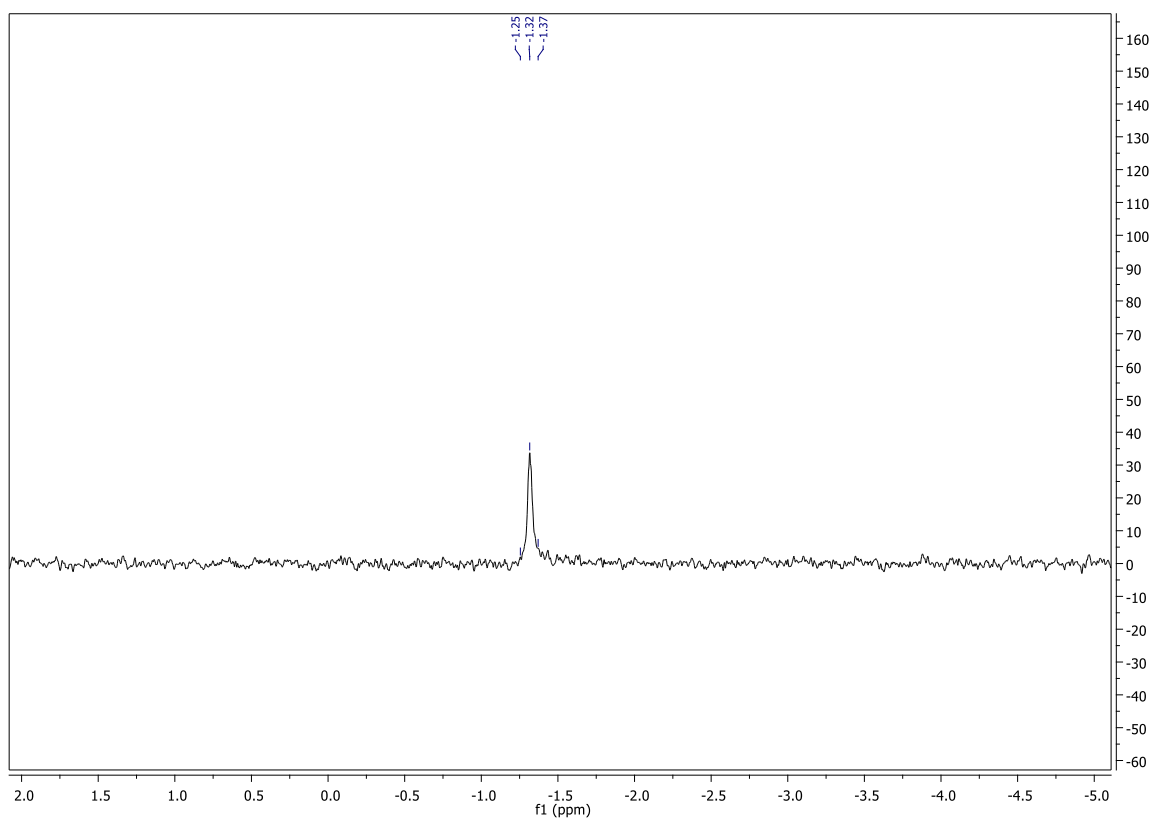

Figure S33:  $^{11}\text{B}$  NMR of Compound 20

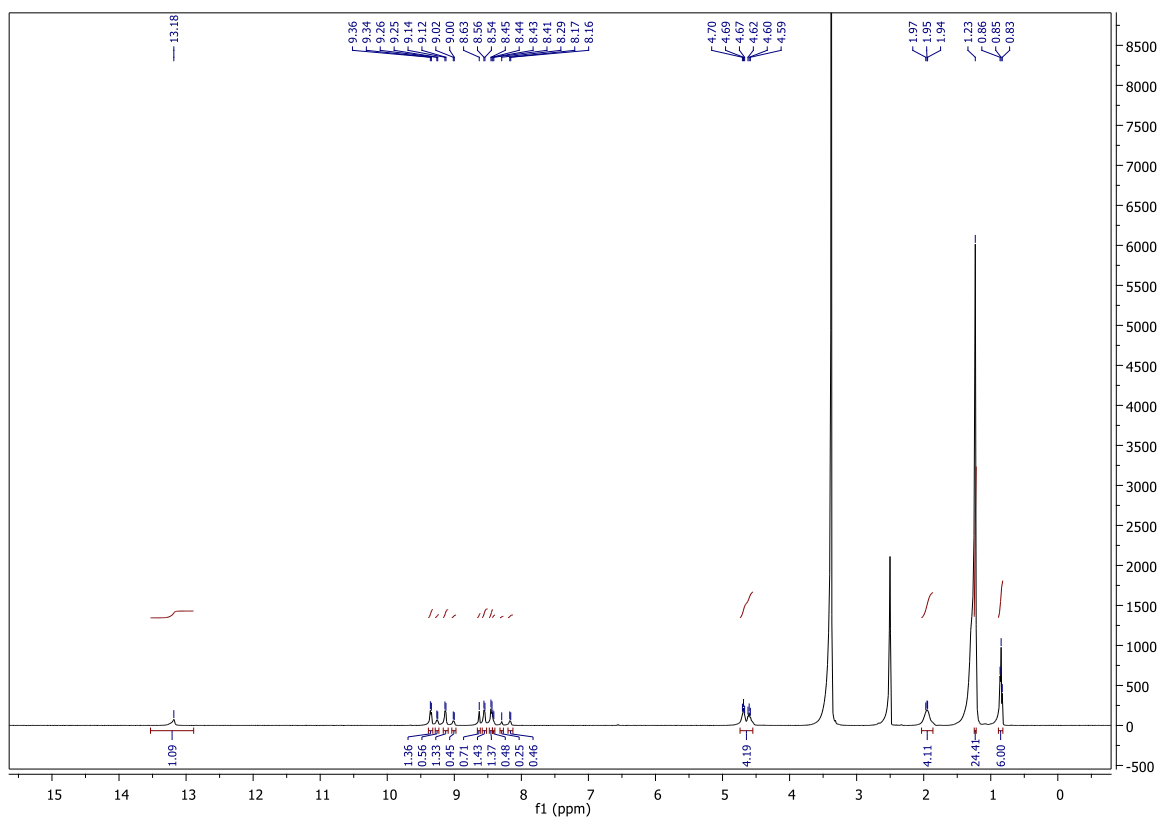

Figure S34:  $^1\text{H}$  NMR of Compound 21



Figure S35: <sup>13</sup>C NMR of Compound 21

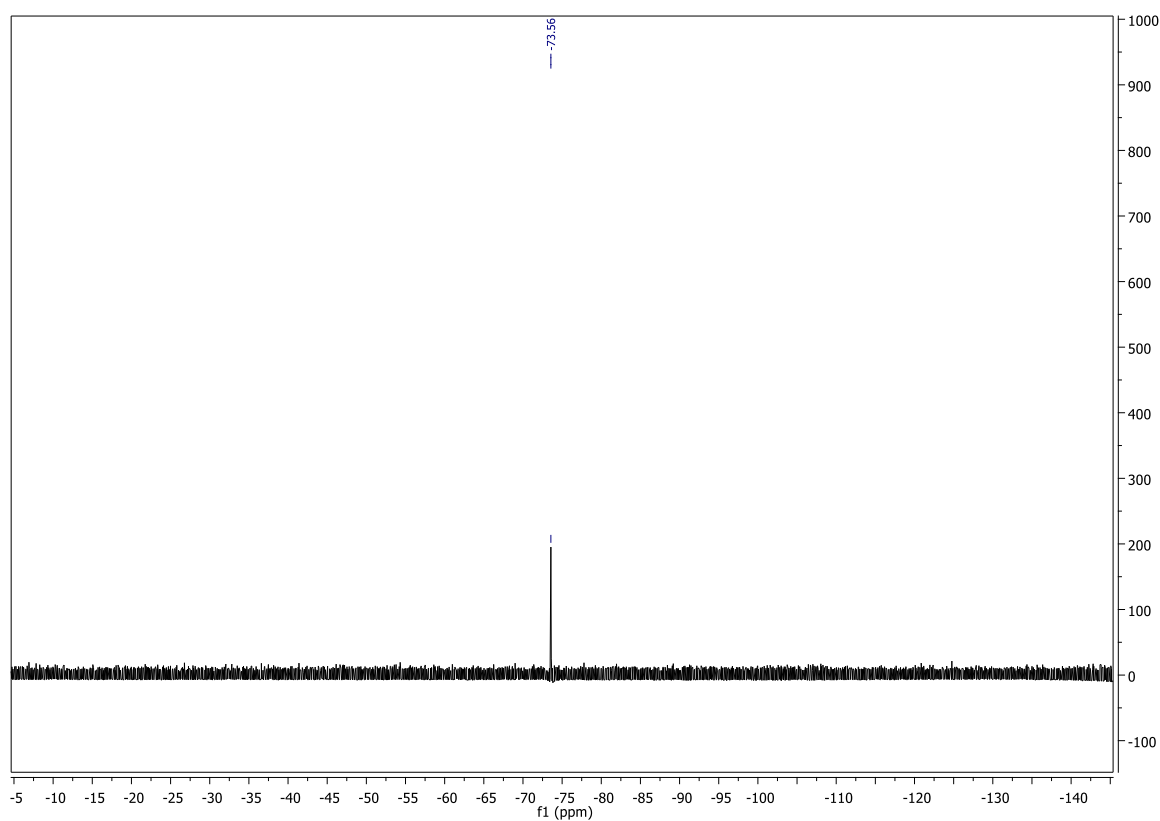

Figure S36: <sup>19</sup>F NMR of Compound 21

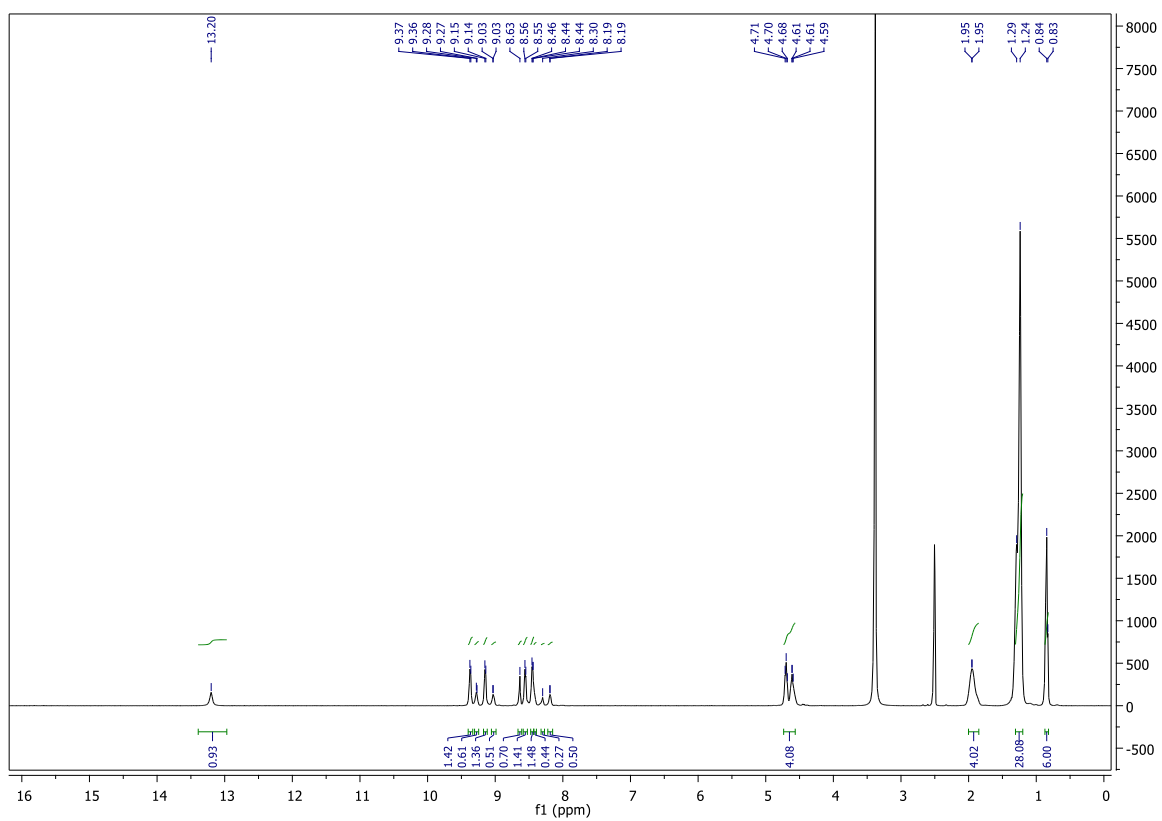

Figure S37:  $^1\text{H}$  NMR of Compound 22

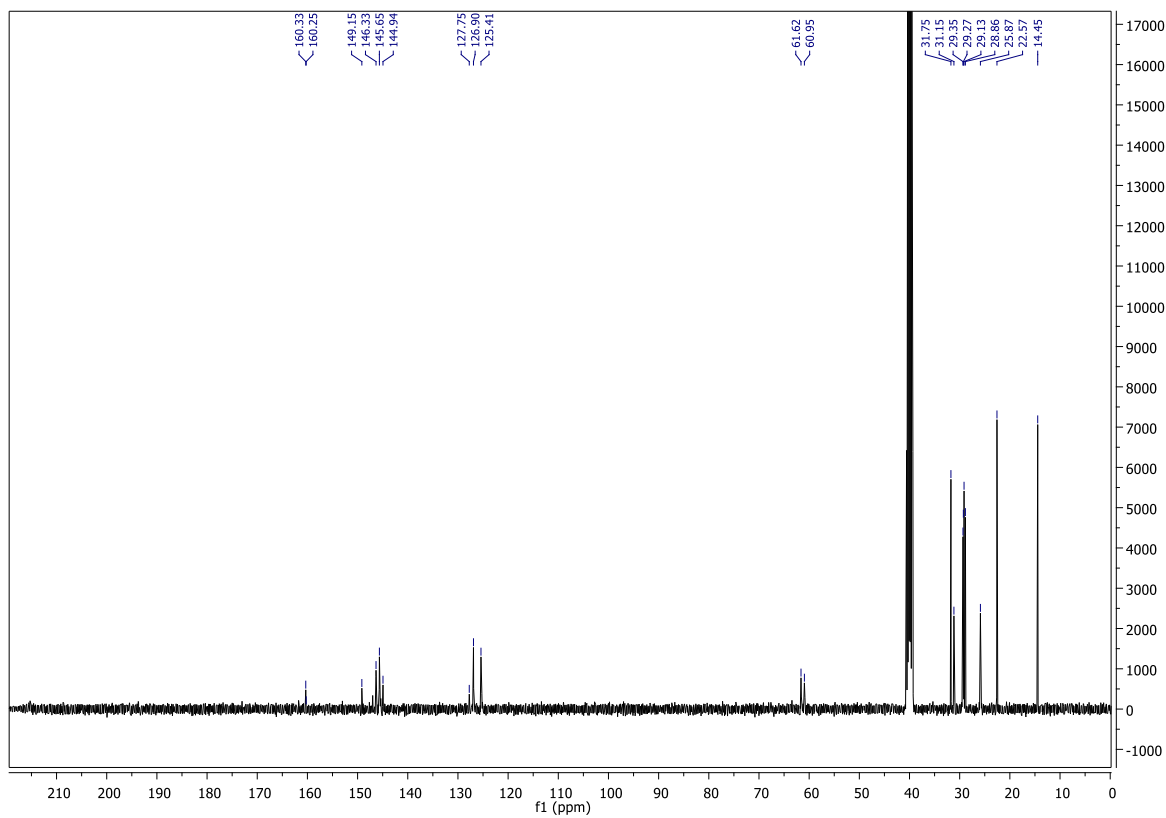

Figure S38:  $^{13}\text{C}$  NMR of Compound 22

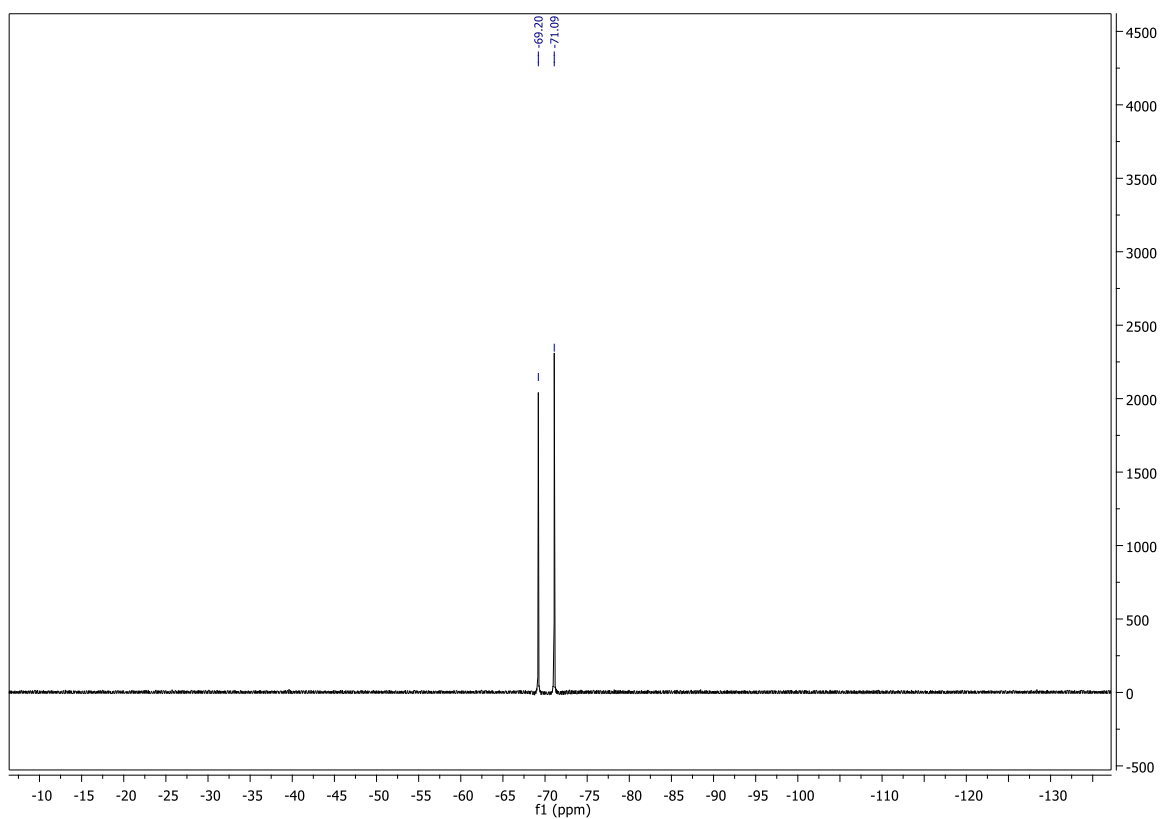

Figure S39:  $^{19}\text{F}$  NMR of Compound 22

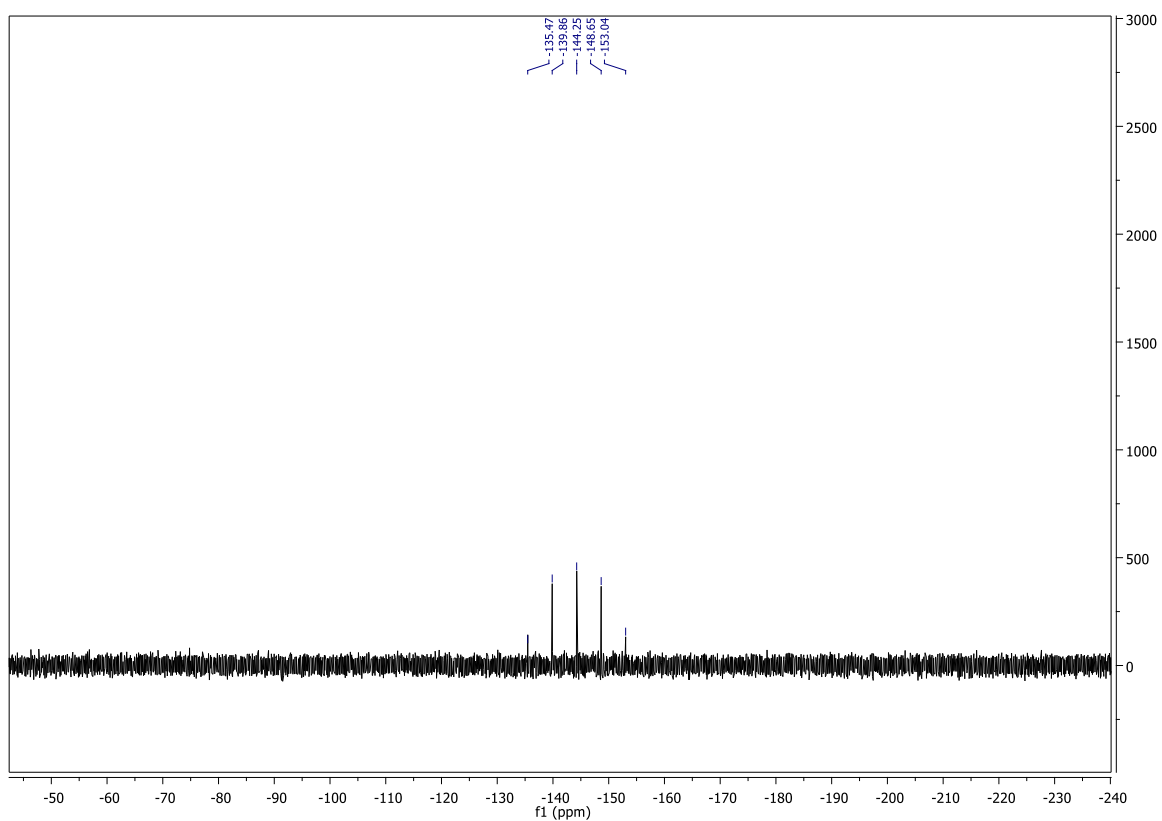

Figure S40:  $^{31}\text{P}$  NMR of Compound 22



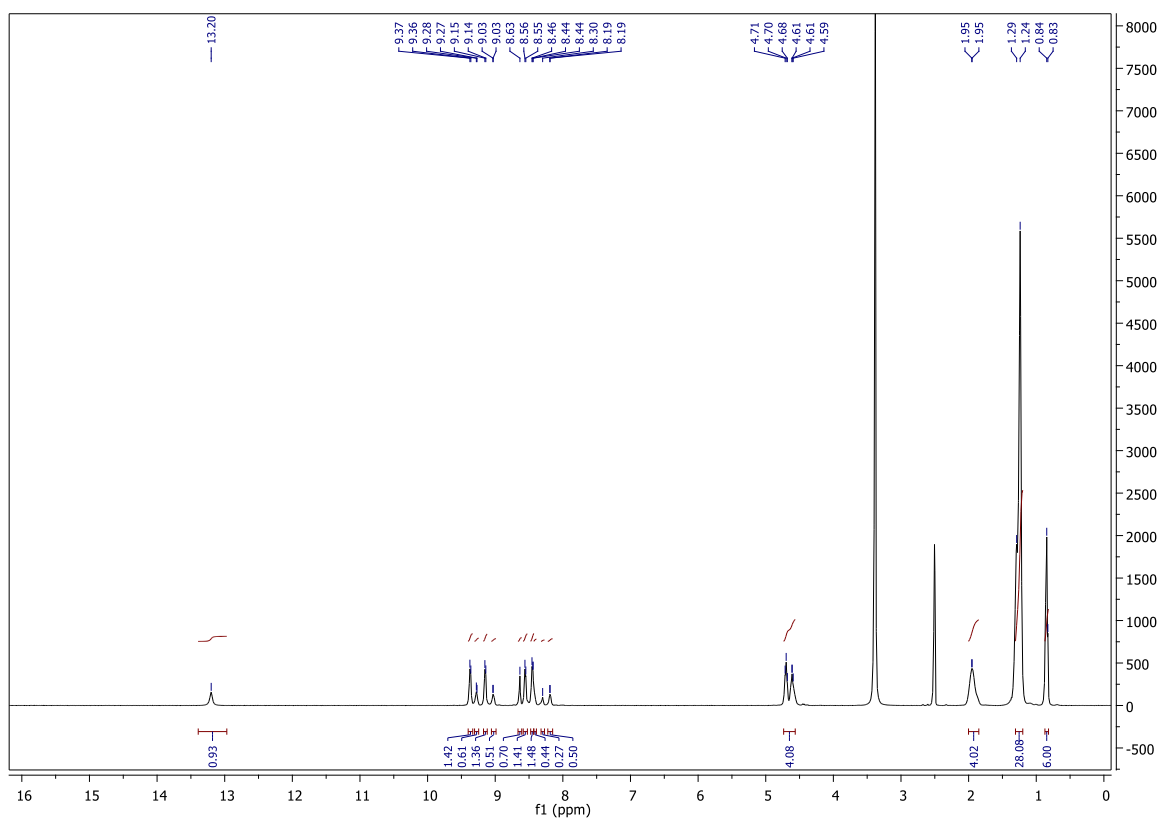

Figure S41:  $^1\text{H}$  NMR of Compound 23

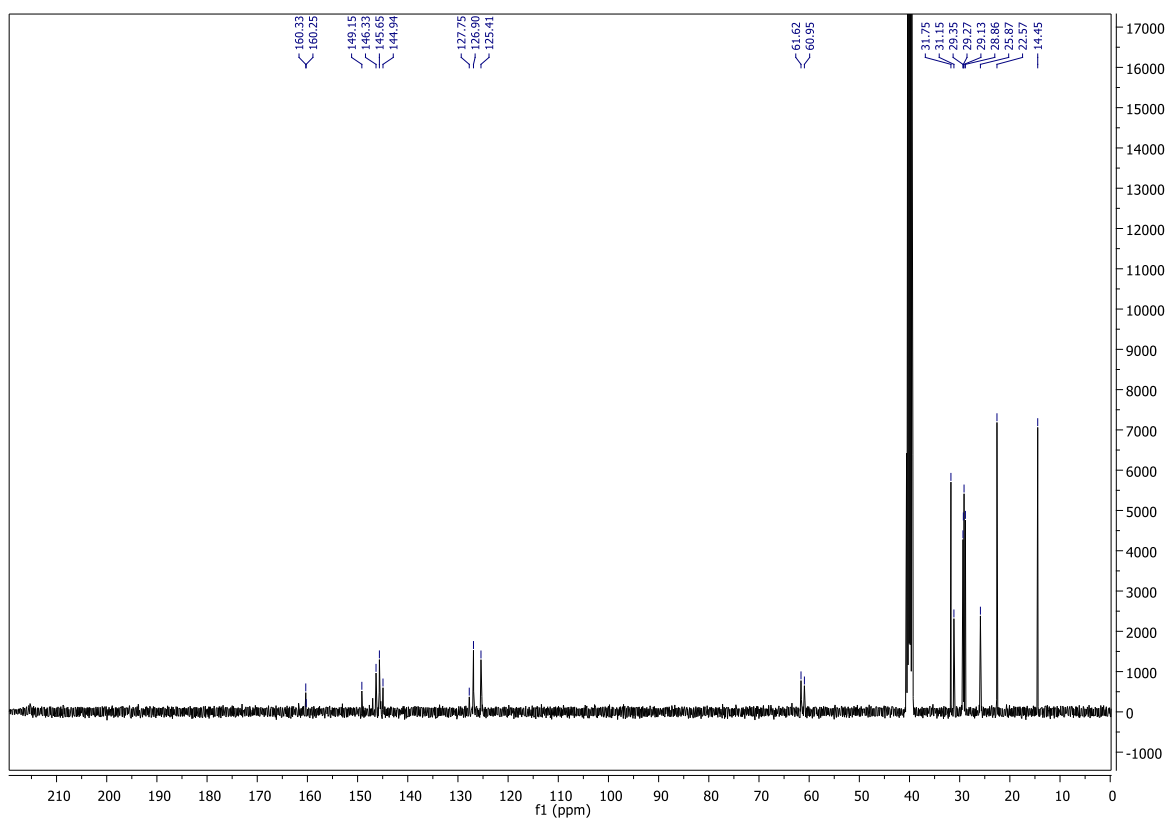

Figure S42:  $^{13}\text{C}$  NMR of Compound 23

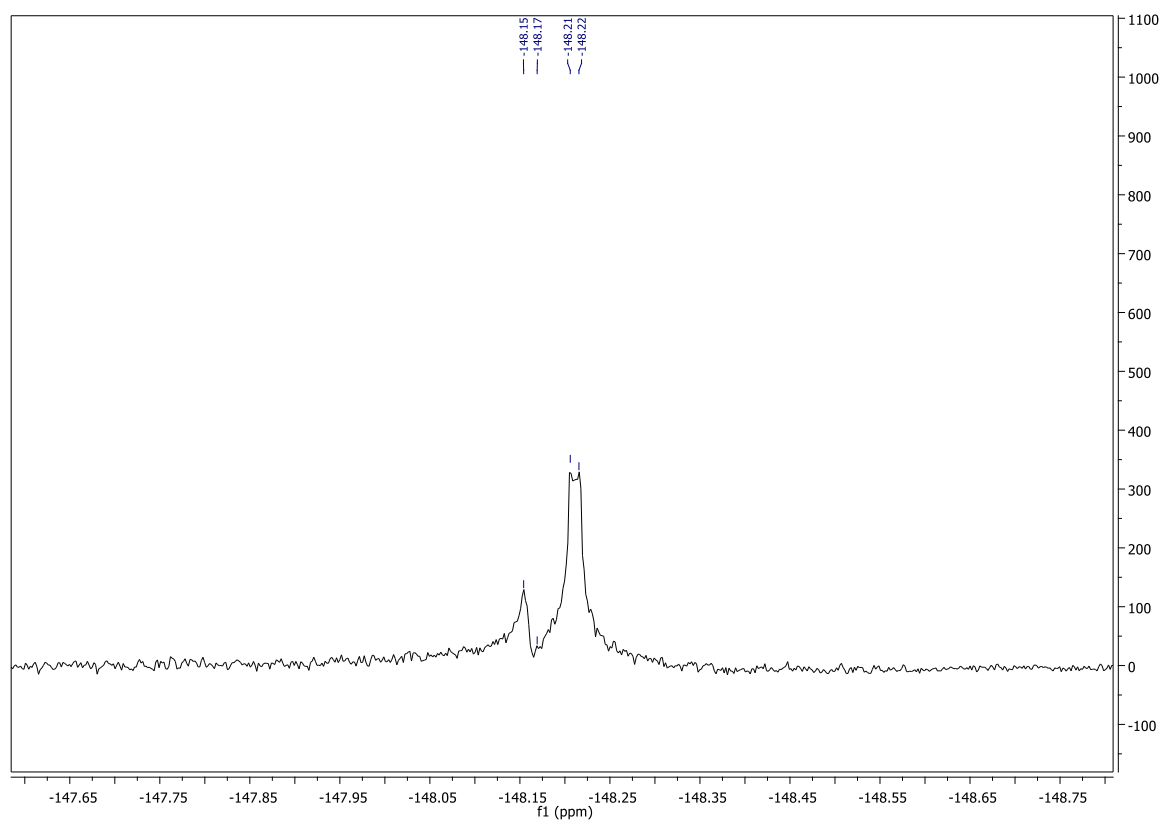

**Figure S43:**  $^{19}\text{F}$  NMR of Compound 23

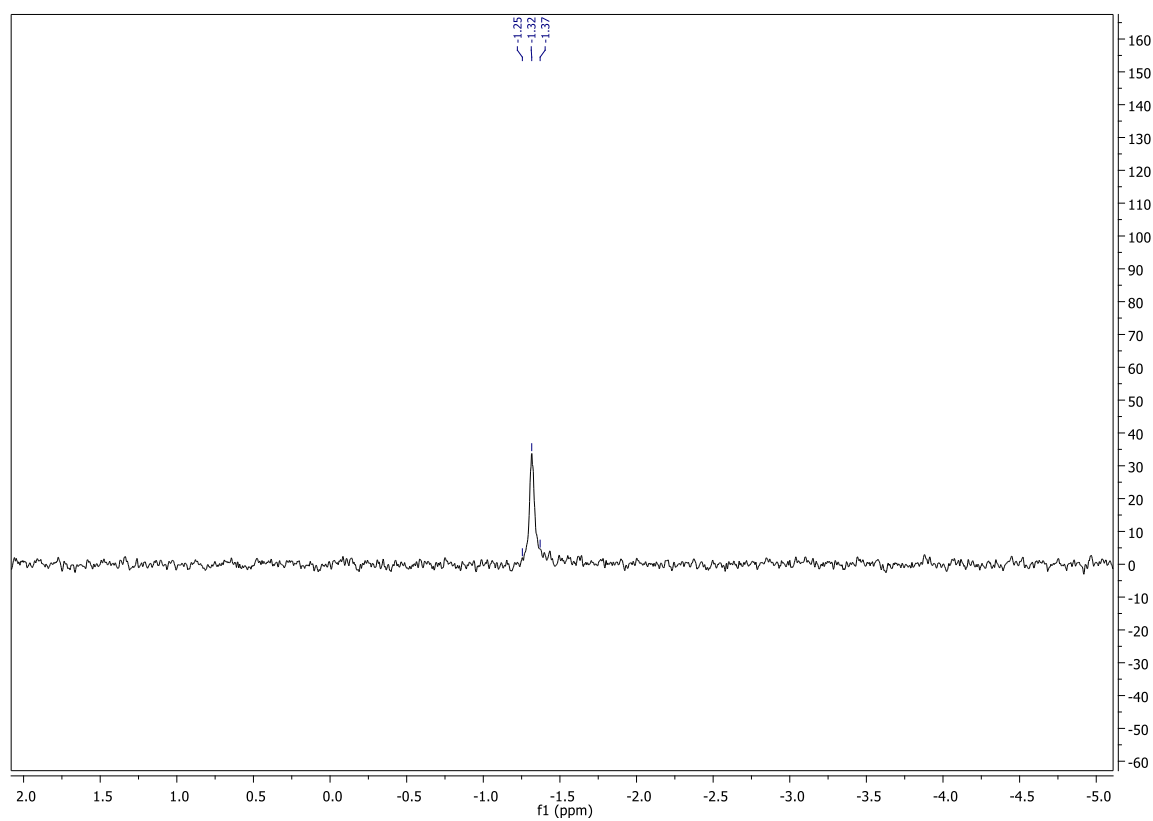

**Figure S44:**  $^{11}\text{B}$  NMR of Compound 23

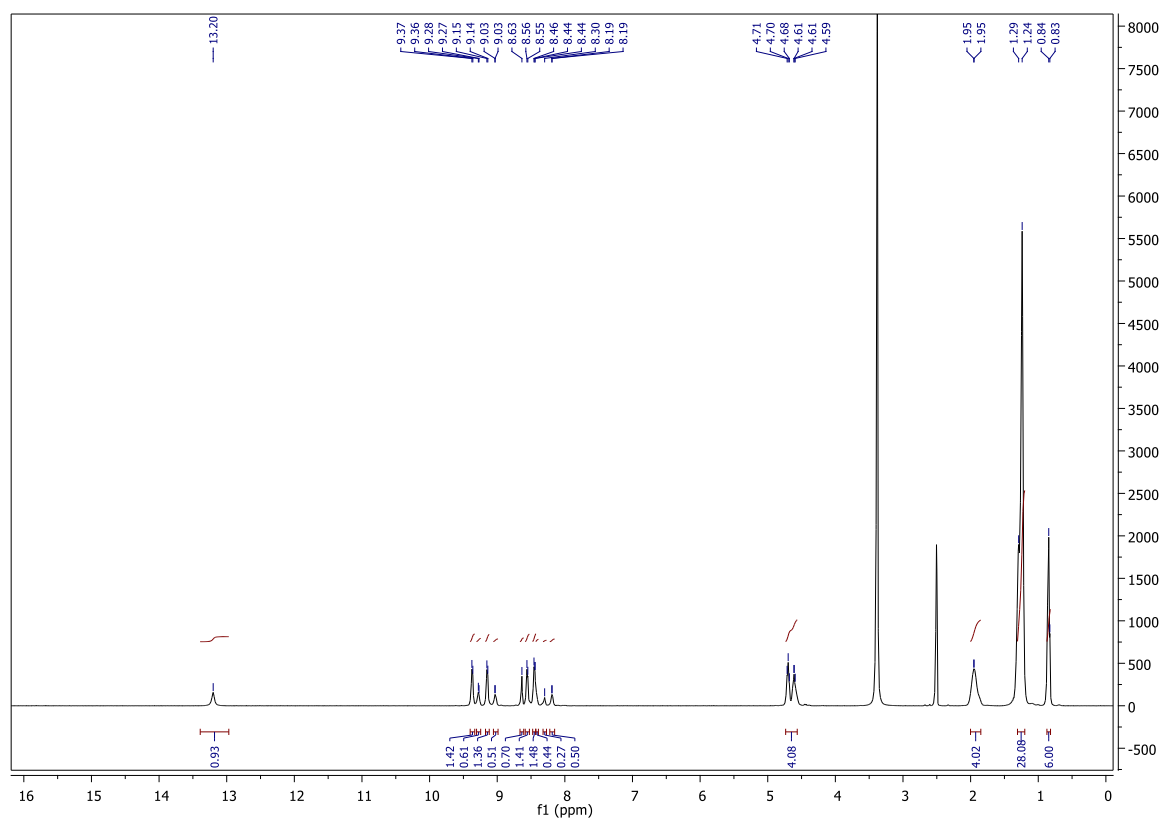

Figure S45: <sup>1</sup>H NMR of Compound 24

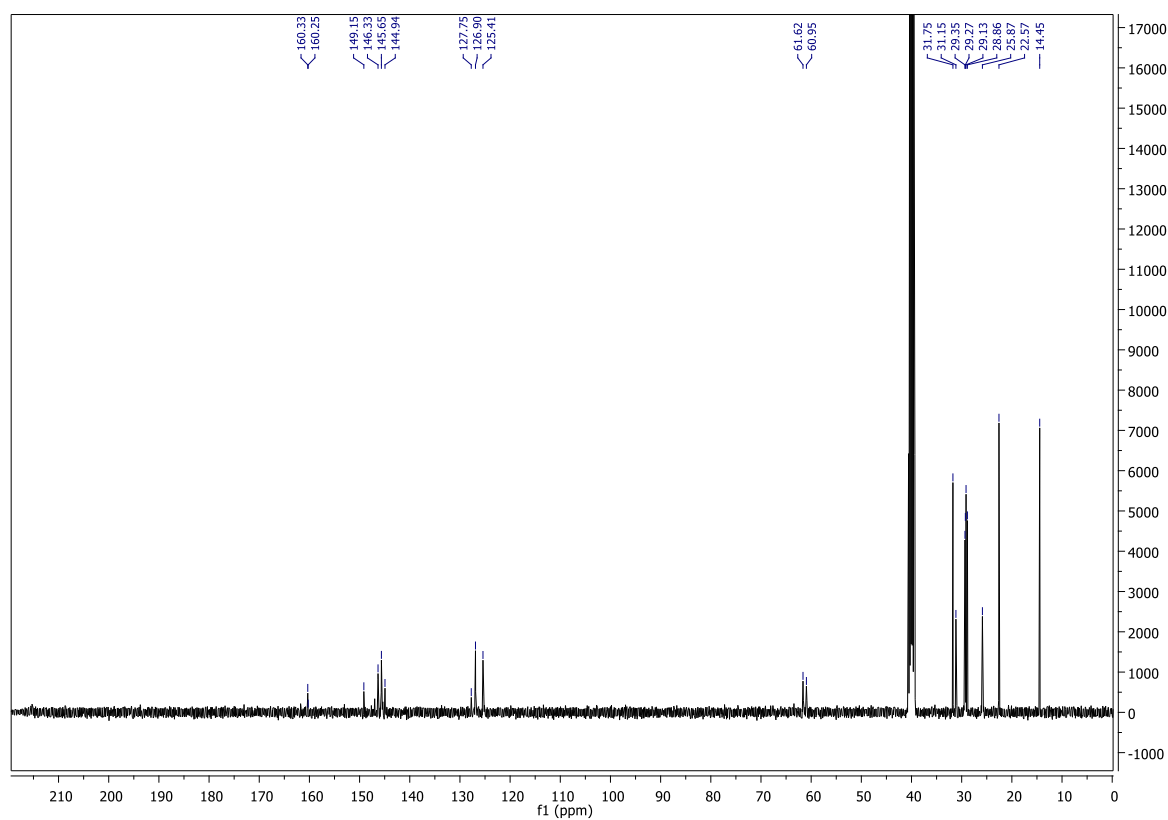

Figure S46: <sup>13</sup>C NMR of Compound 24

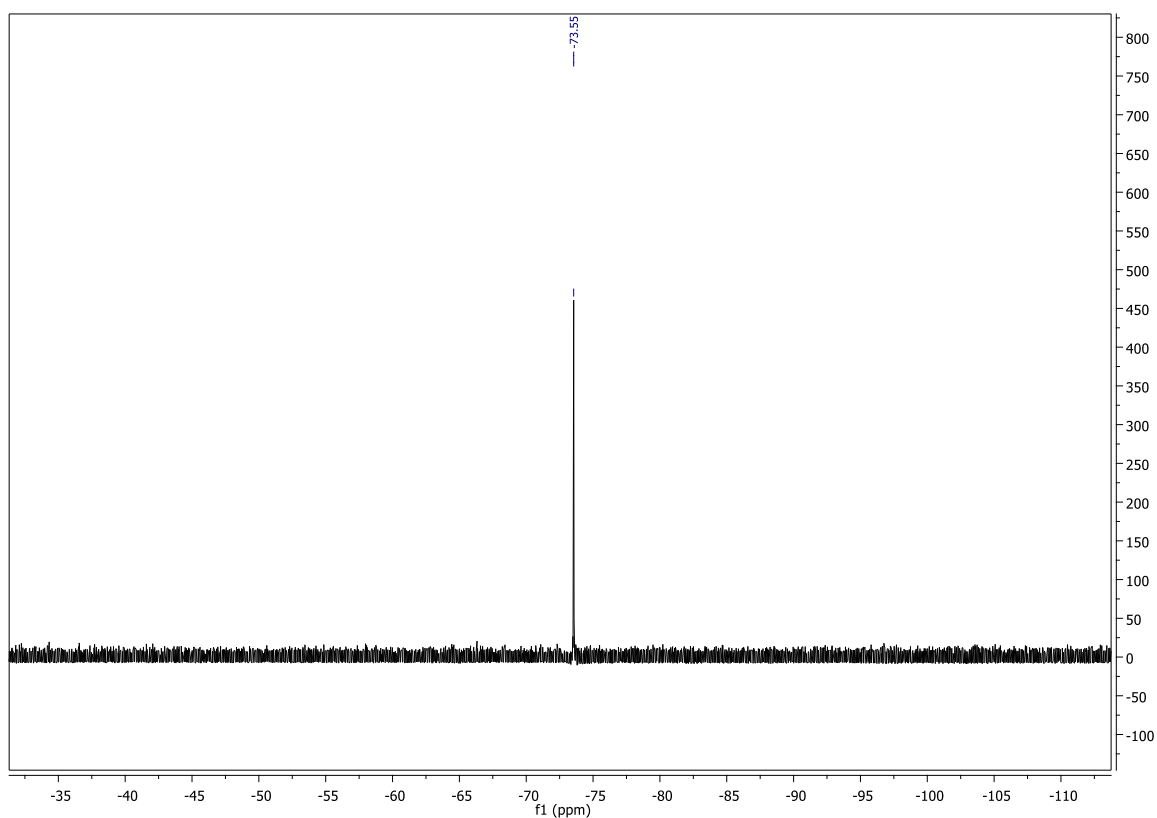

Figure S47:  $^{19}\text{F}$  NMR of Compound 24

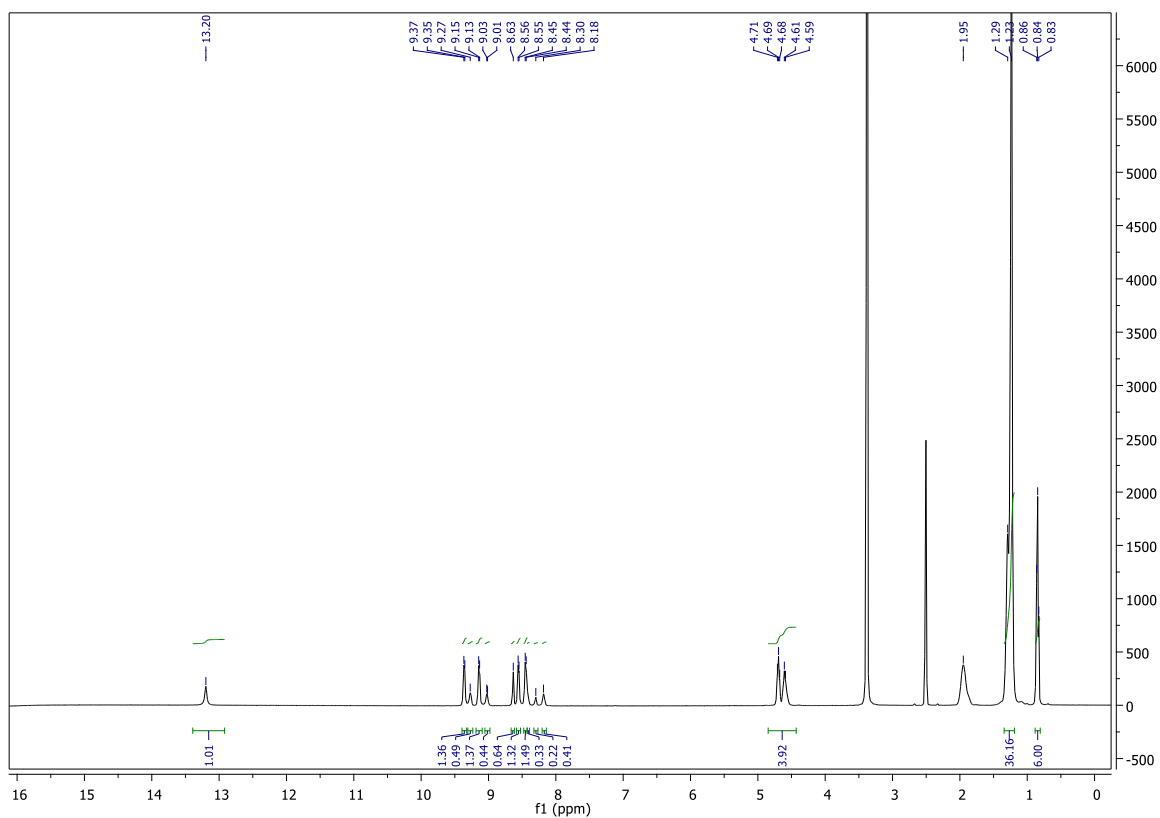

Figure S48:  $^1\text{H}$  NMR of Compound 25

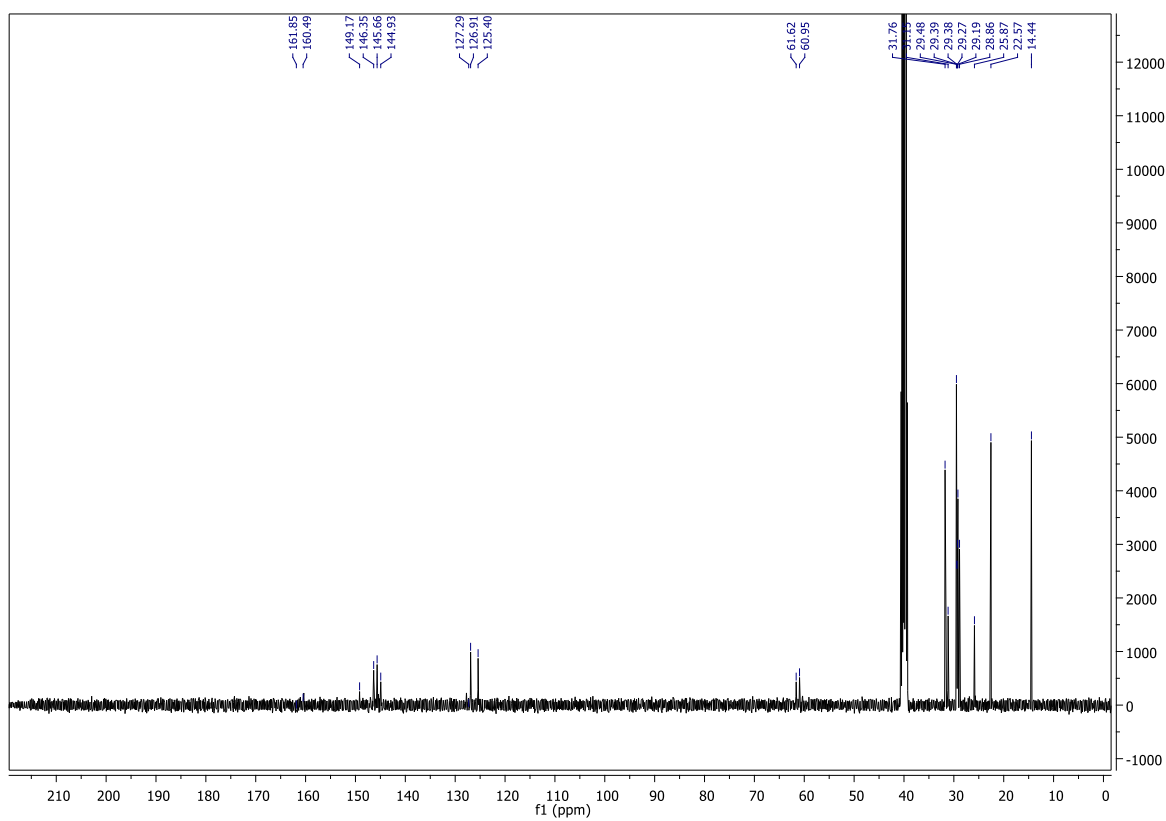

Figure S49:  $^{13}\text{C}$  NMR of Compound 25

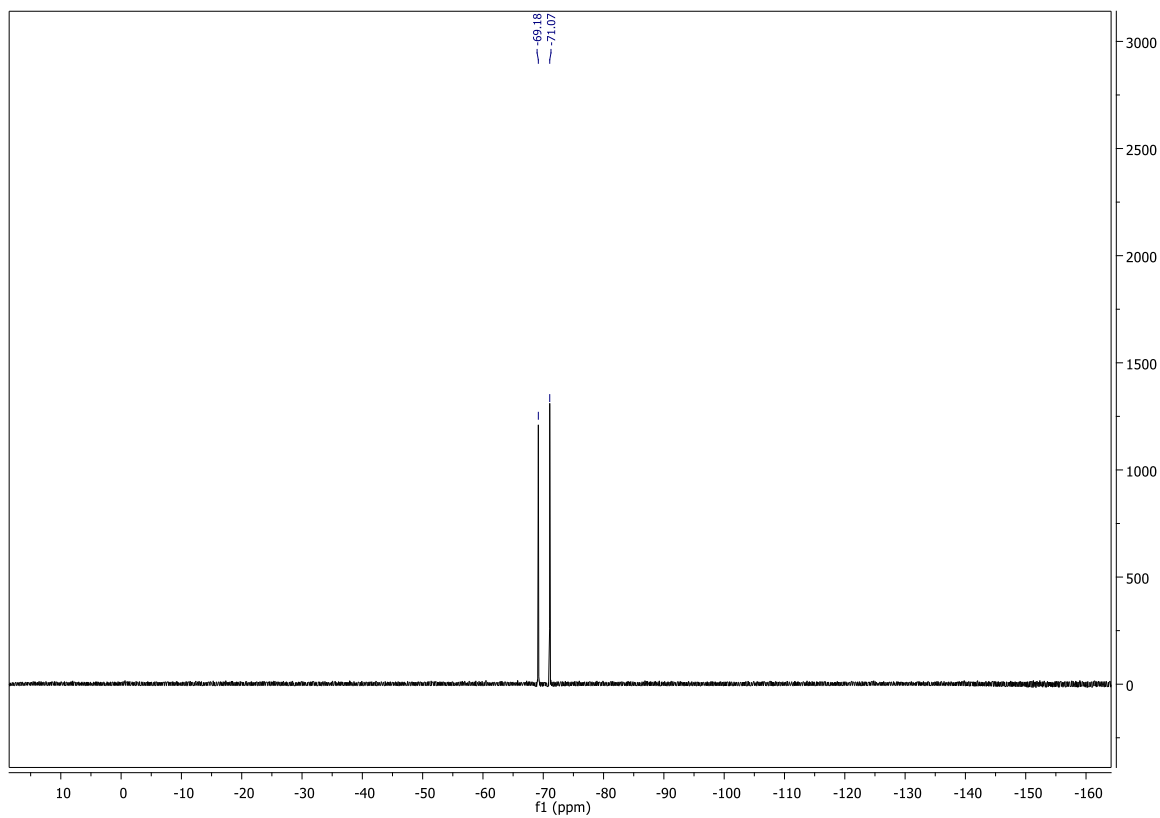

Figure S50:  $^{19}\text{F}$  NMR of Compound 25

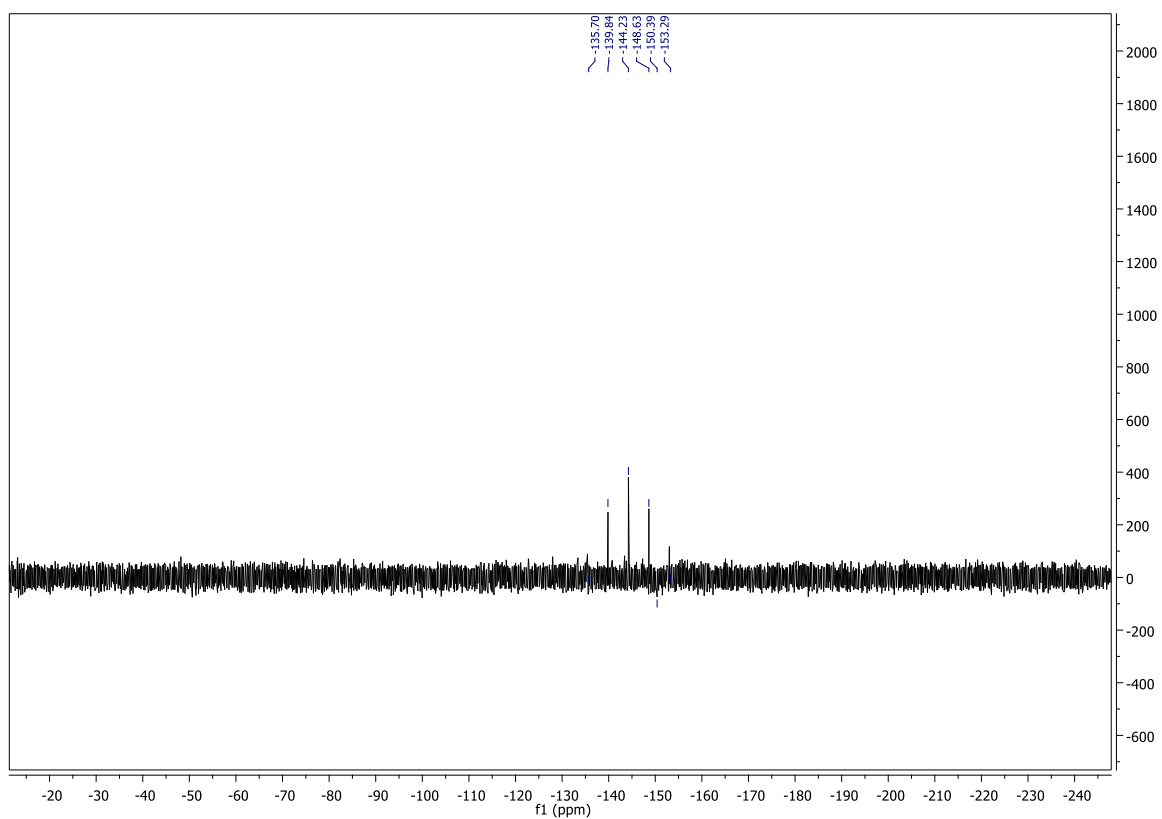

Figure S51:  $^{31}\text{P}$  NMR of Compound 25

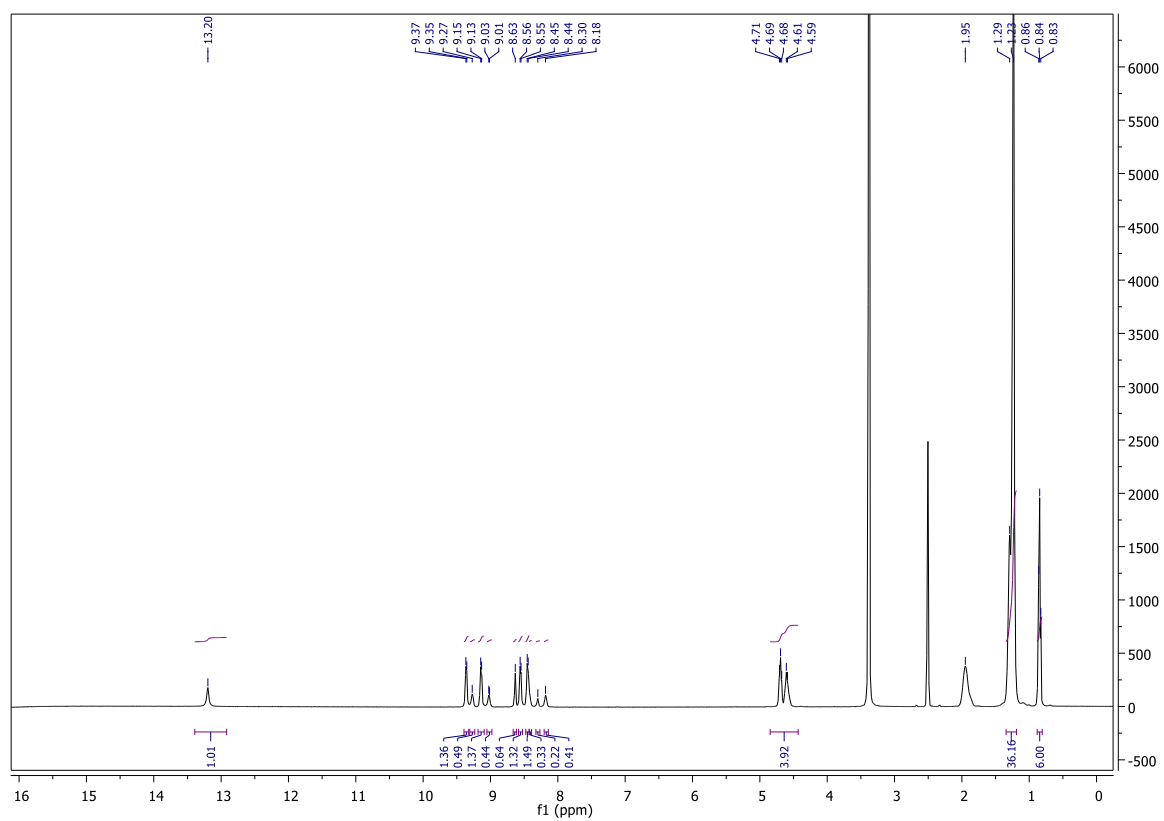

Figure S52:  $^1\text{H}$  NMR of Compound 26

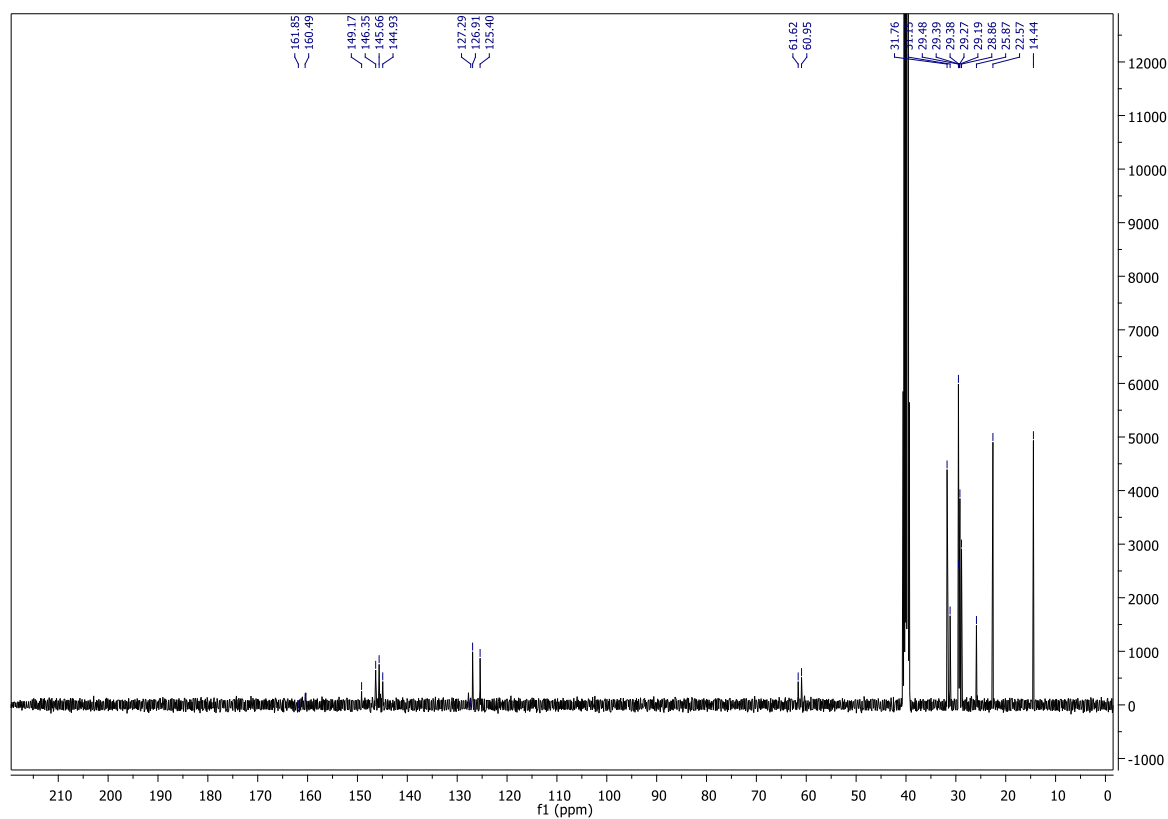

Figure S53: <sup>13</sup>C NMR of Compound 26

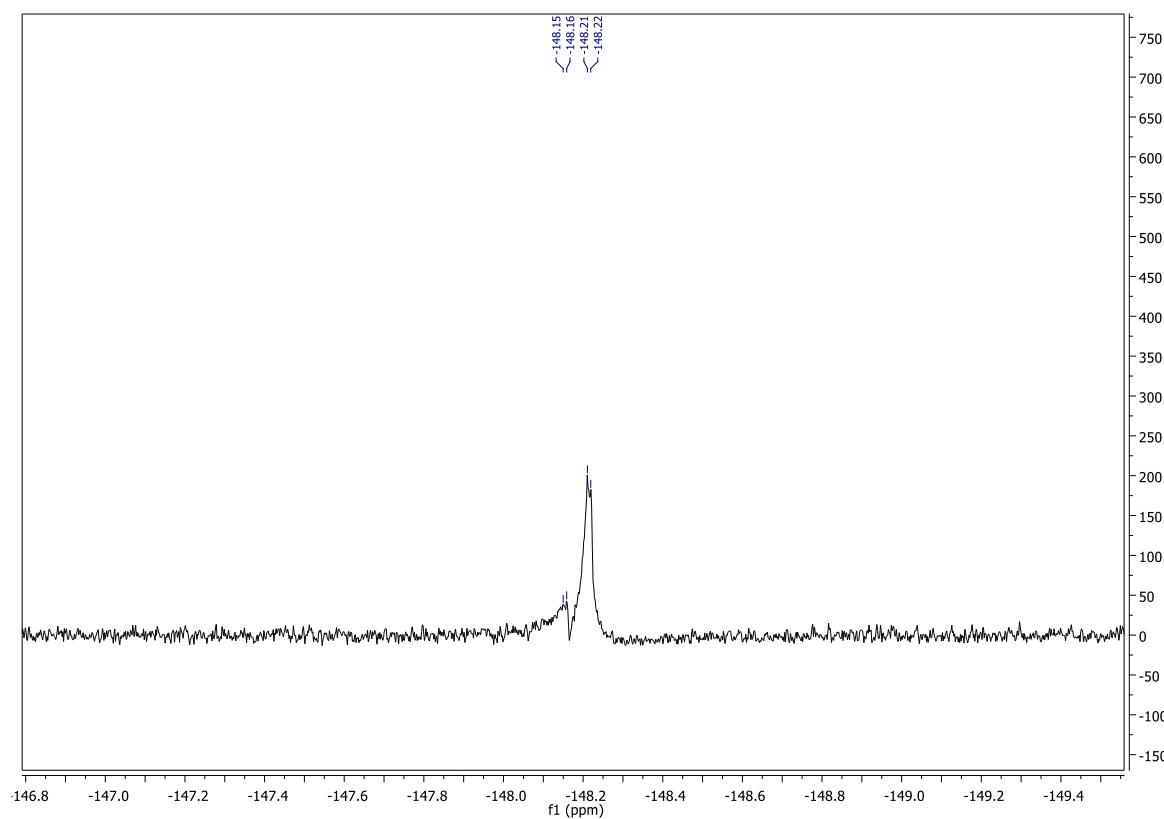

Figure S54: <sup>19</sup>F NMR of Compound 26

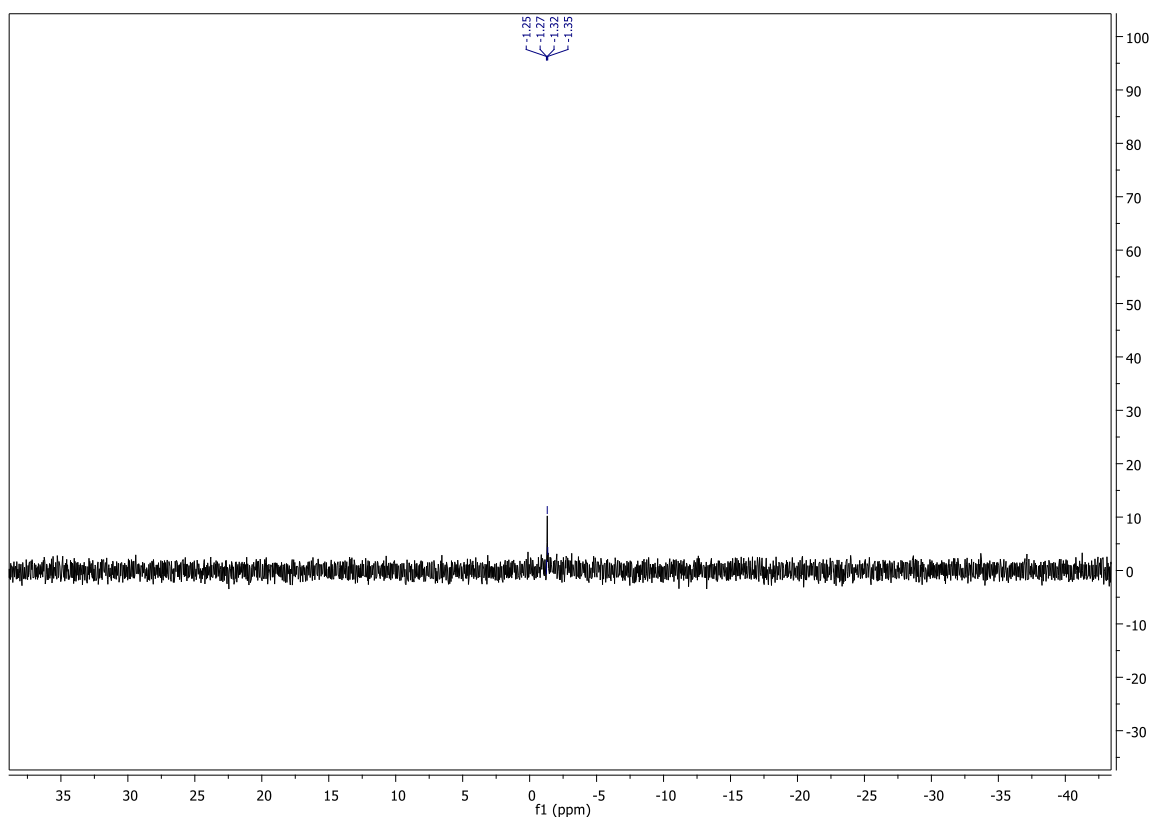

Figure S55: <sup>11</sup>B NMR of Compound 26

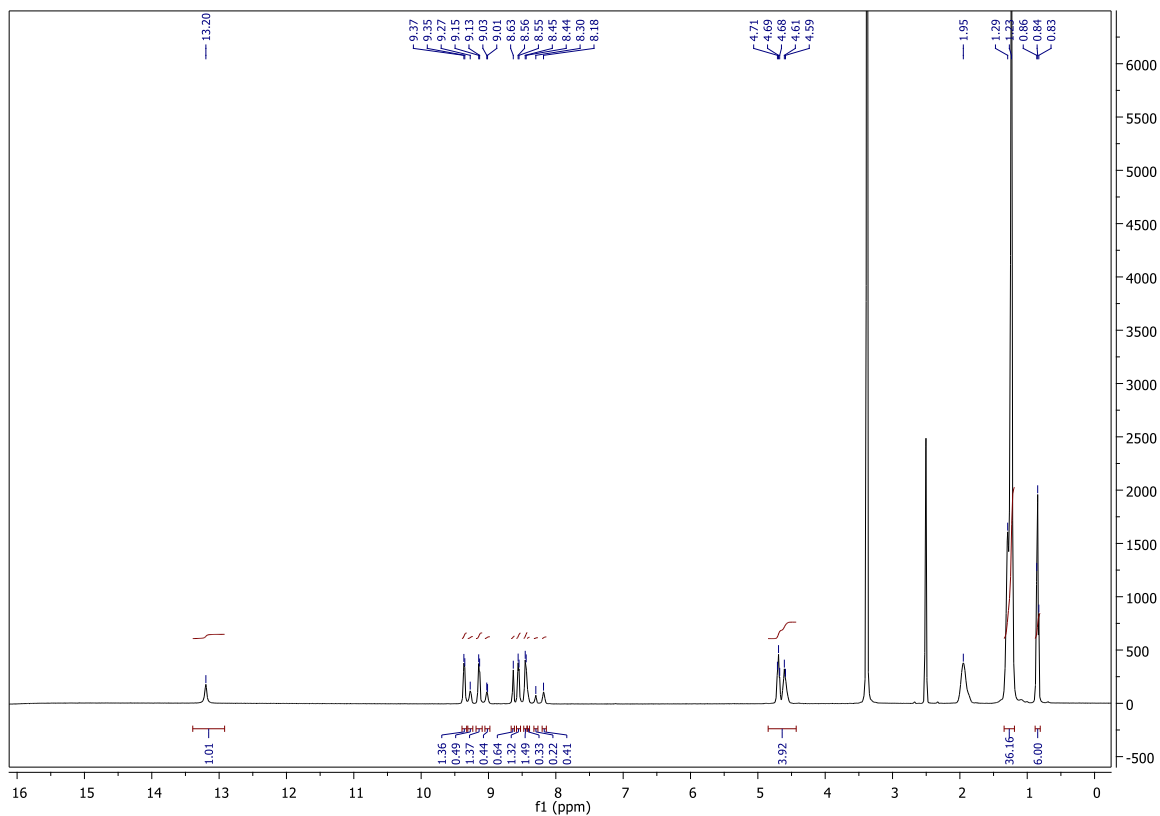

Figure S56: <sup>1</sup>H NMR of Compound 27



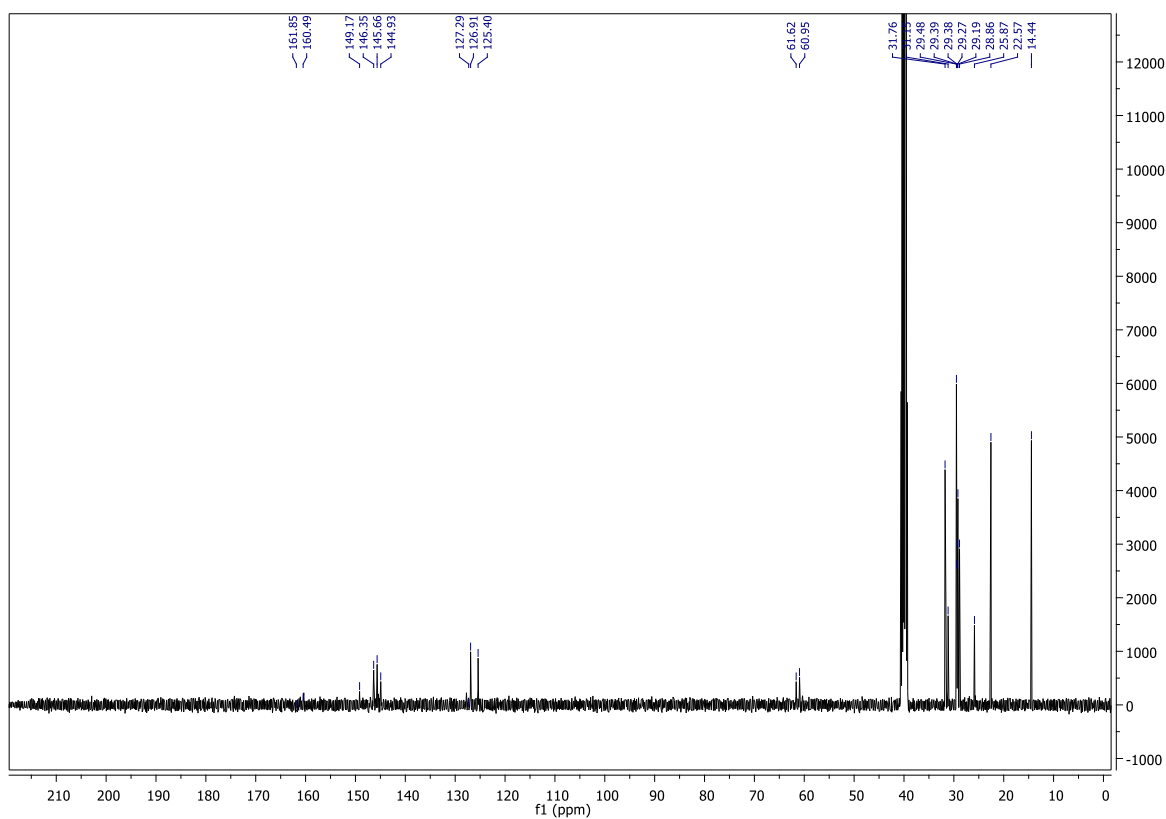

Figure S57: <sup>13</sup>C NMR of Compound 27

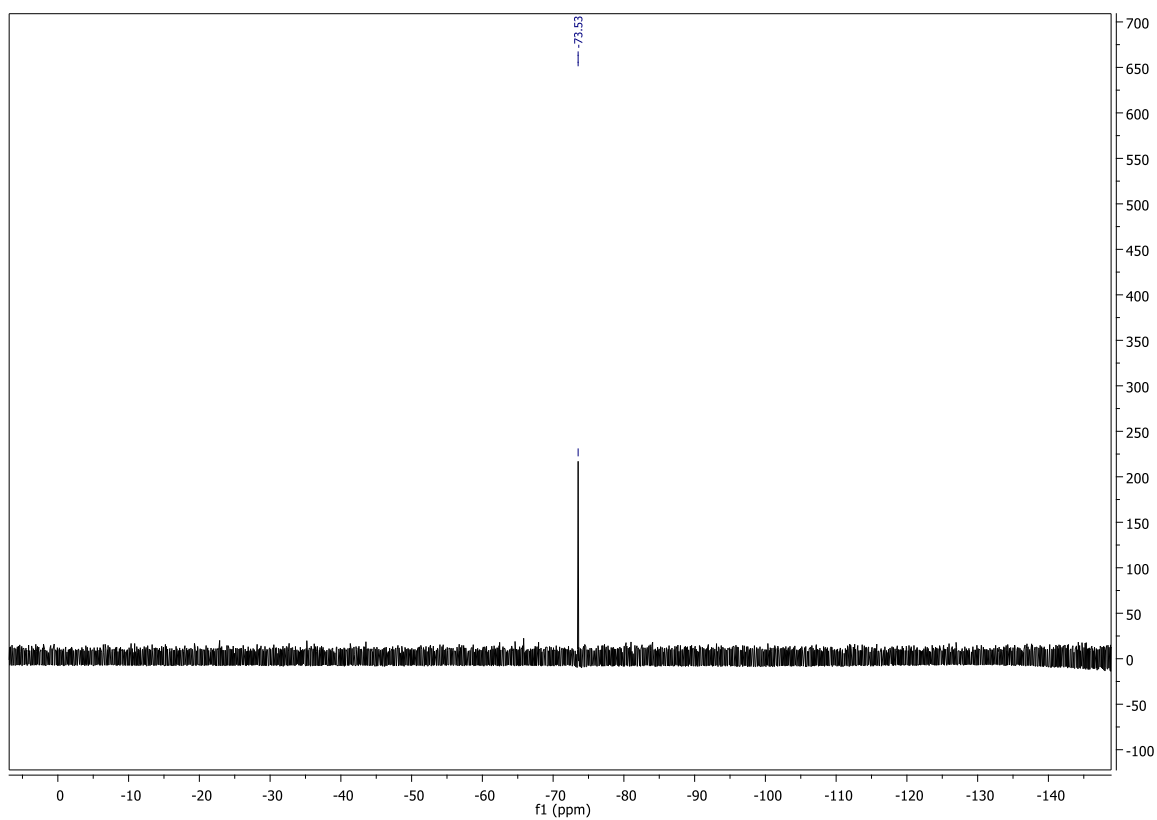

Figure S58: <sup>19</sup>F NMR of Compound 27

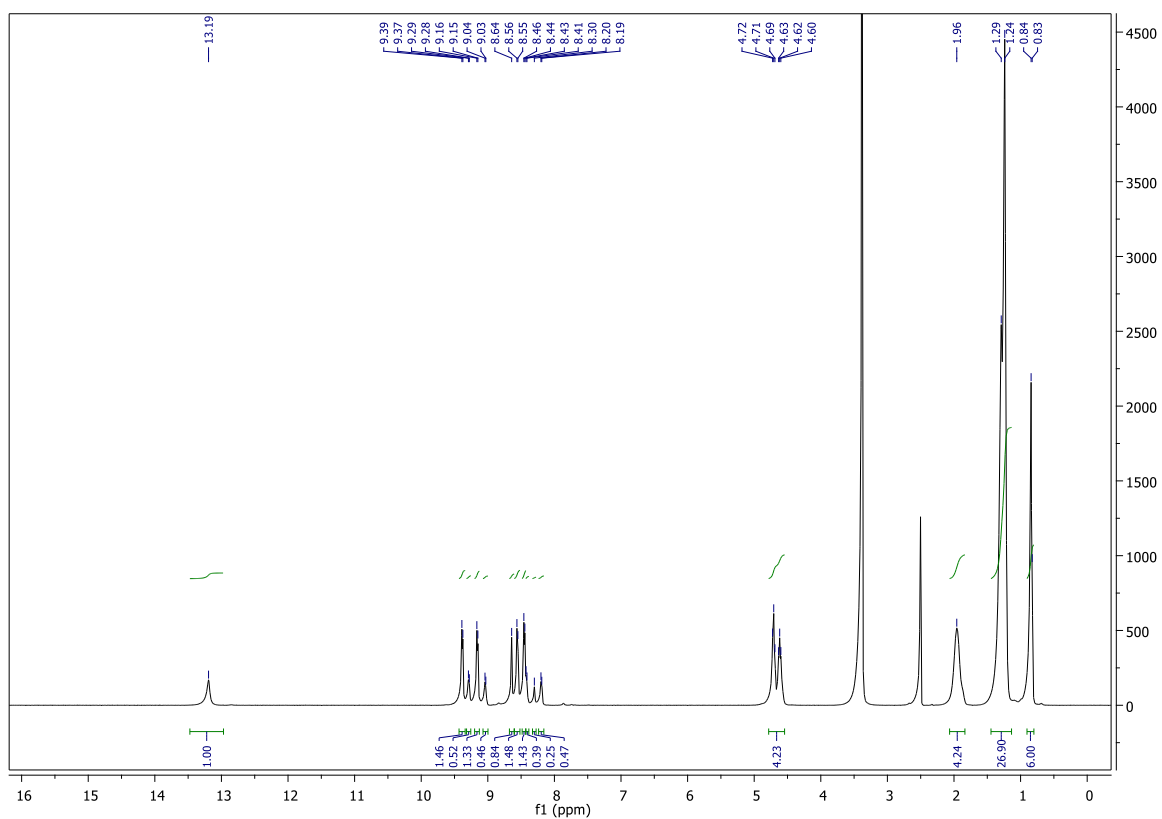

Figure S59:  $^1\text{H}$  NMR of Compound 28

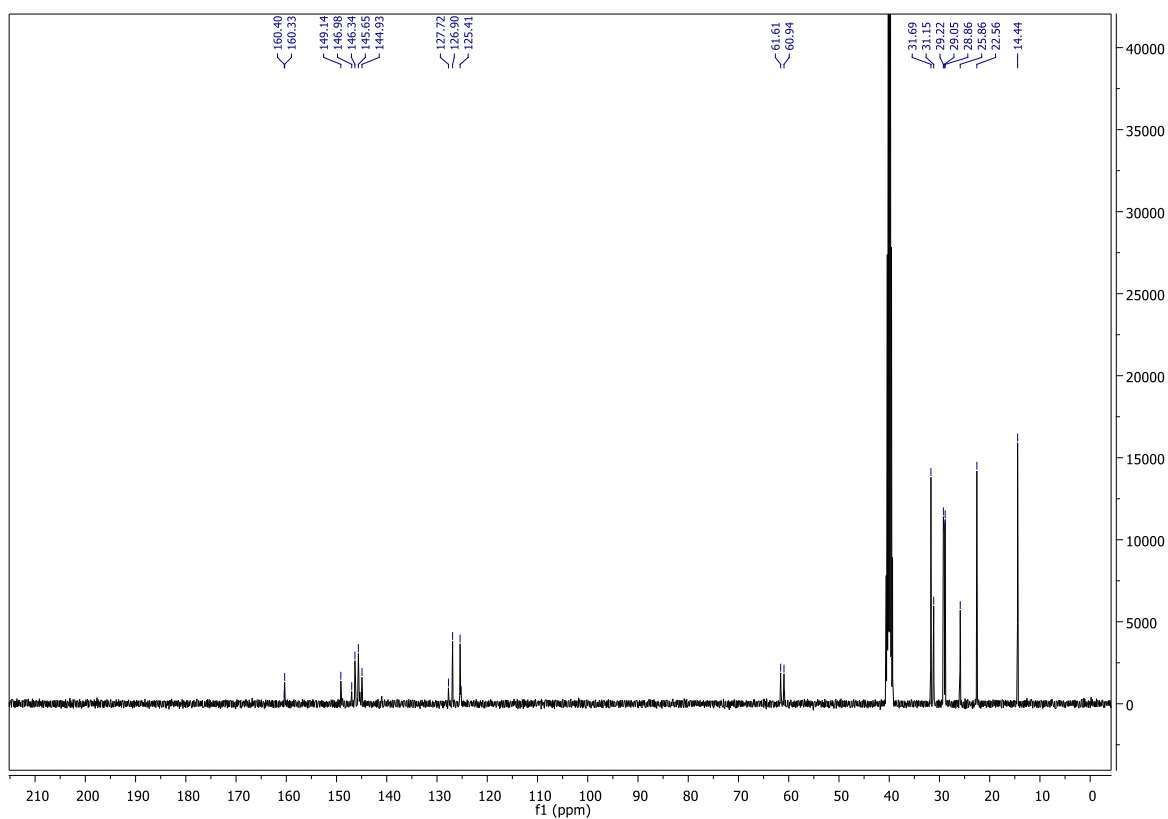

Figure S60:  $^{13}\text{C}$  NMR of Compound 28

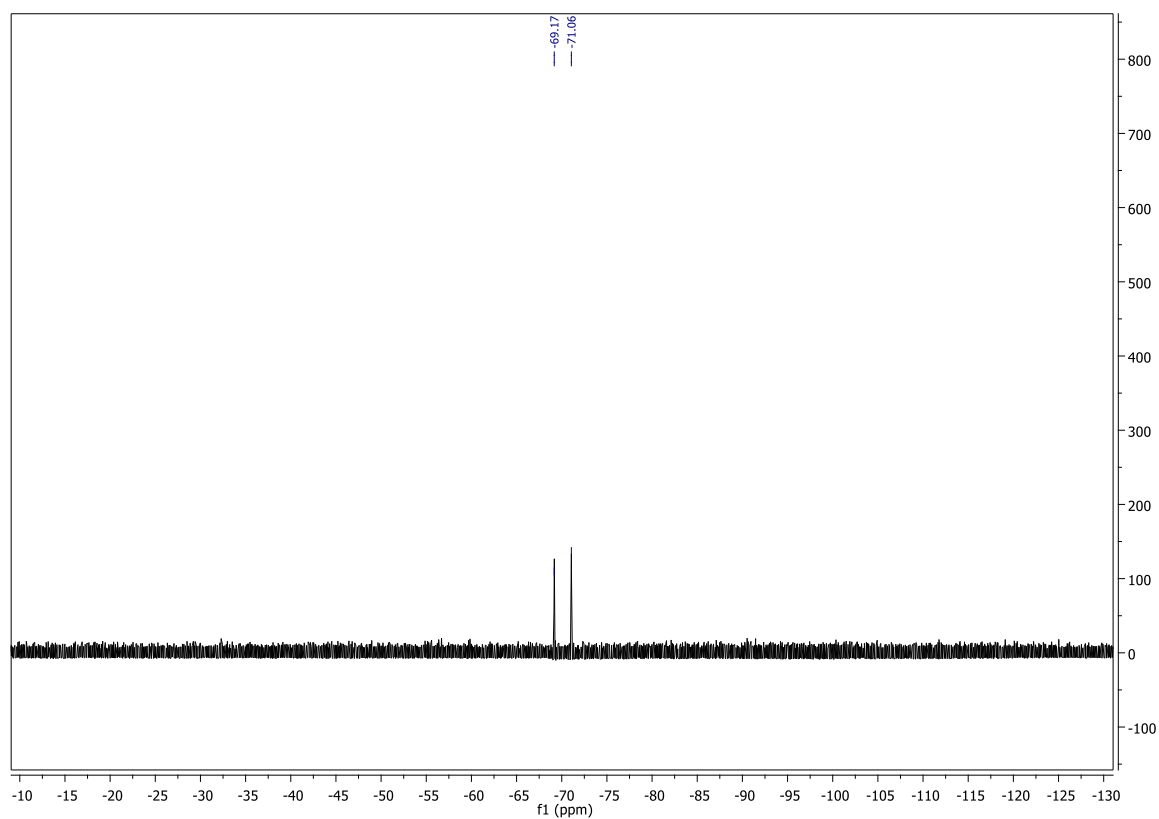

Figure S61:  $^{19}\text{F}$  NMR of Compound 28

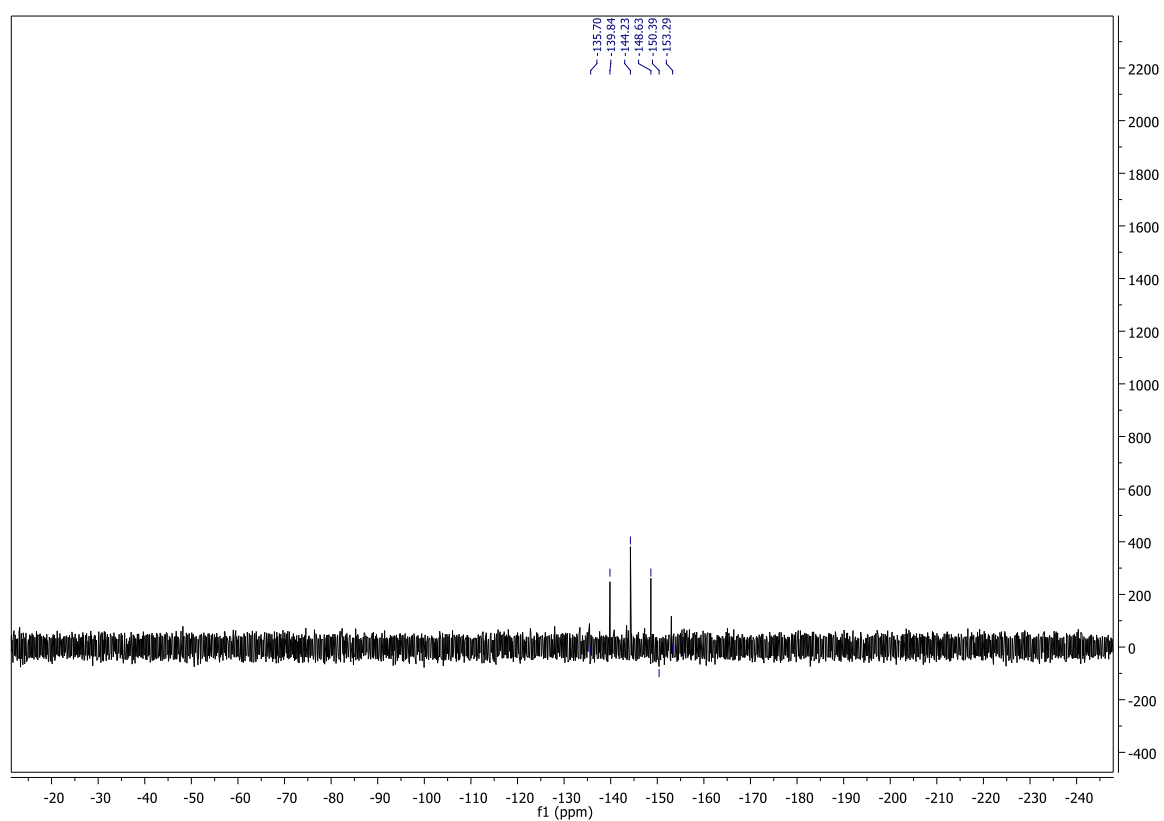

Figure S62:  $^{31}\text{P}$  NMR of Compound 28

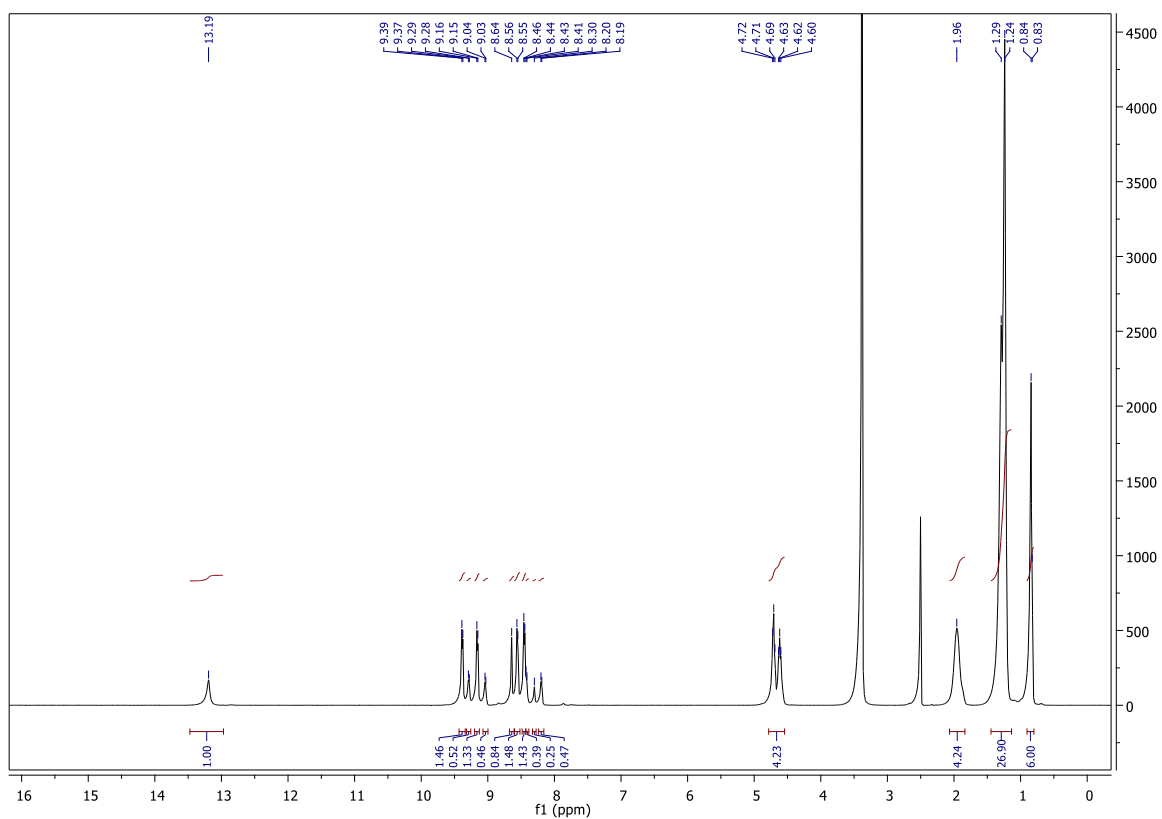

Figure S63:  $^1\text{H}$  NMR of Compound 29



Figure S64:  $^{13}\text{C}$  NMR of Compound 29

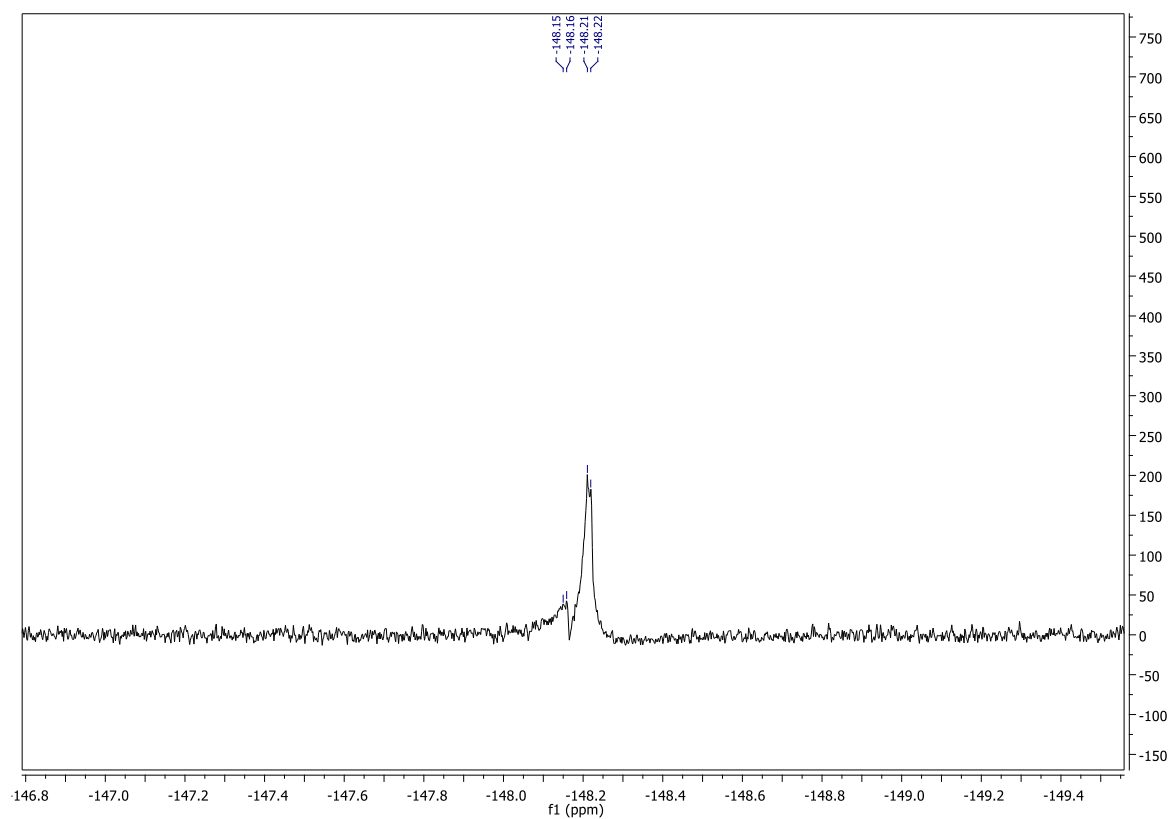

Figure S65:  $^{19}\text{F}$  NMR of Compound 29

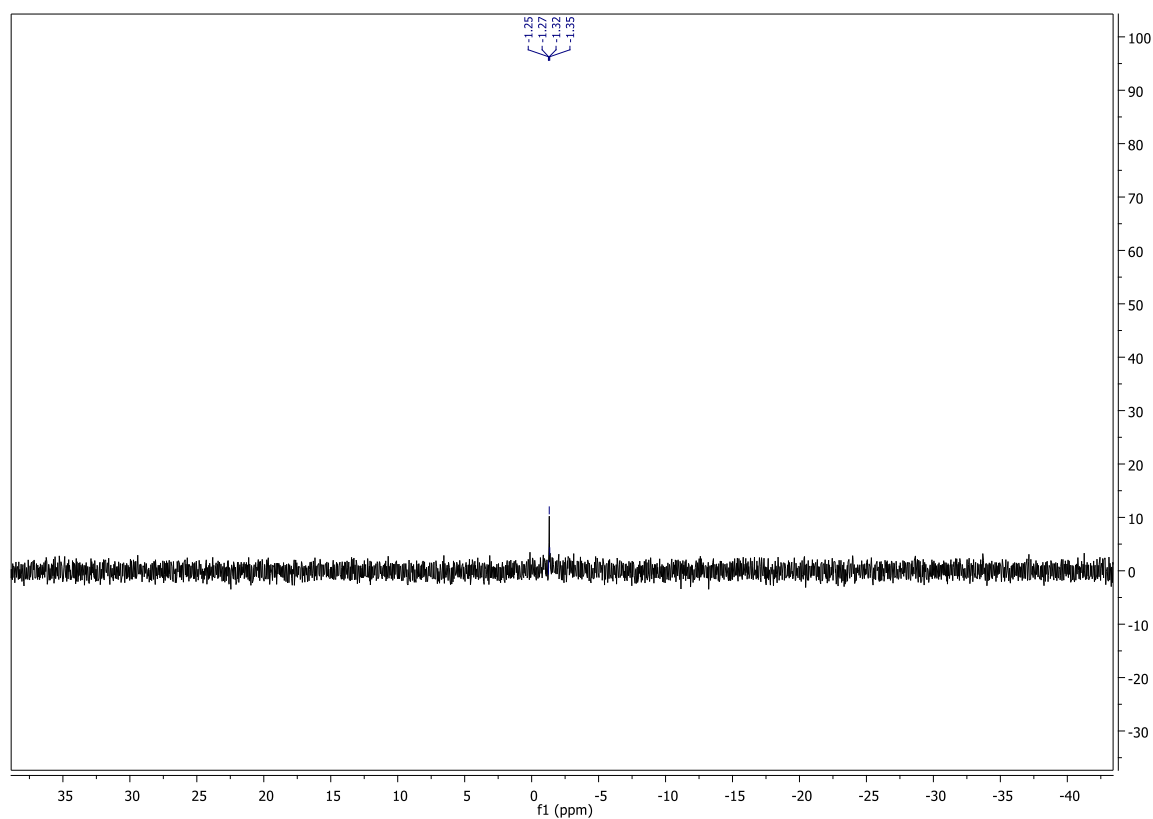

Figure S66:  $^{11}\text{B}$  NMR of Compound 29



Figure S67:  $^1\text{H}$  NMR of Compound 30



Figure S68:  $^{13}\text{C}$  NMR of Compound 30

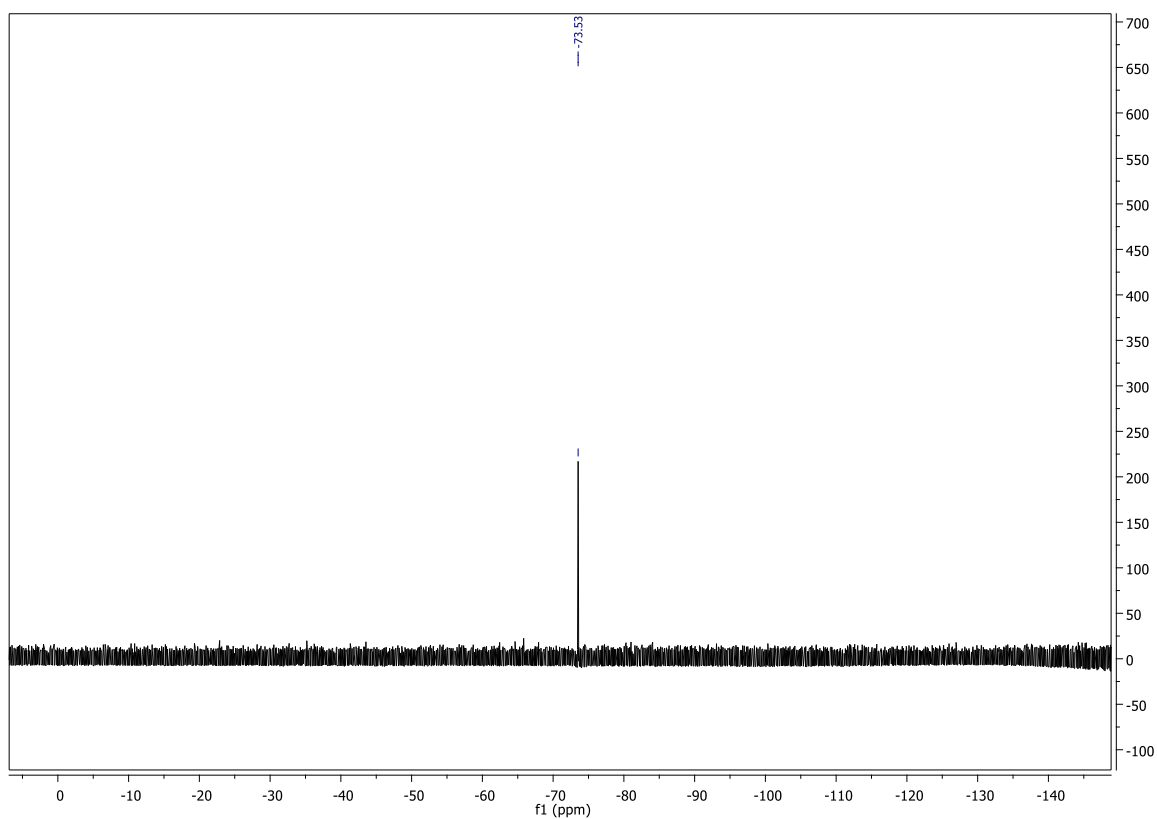

Figure S69:  $^{19}\text{F}$  NMR of Compound 30

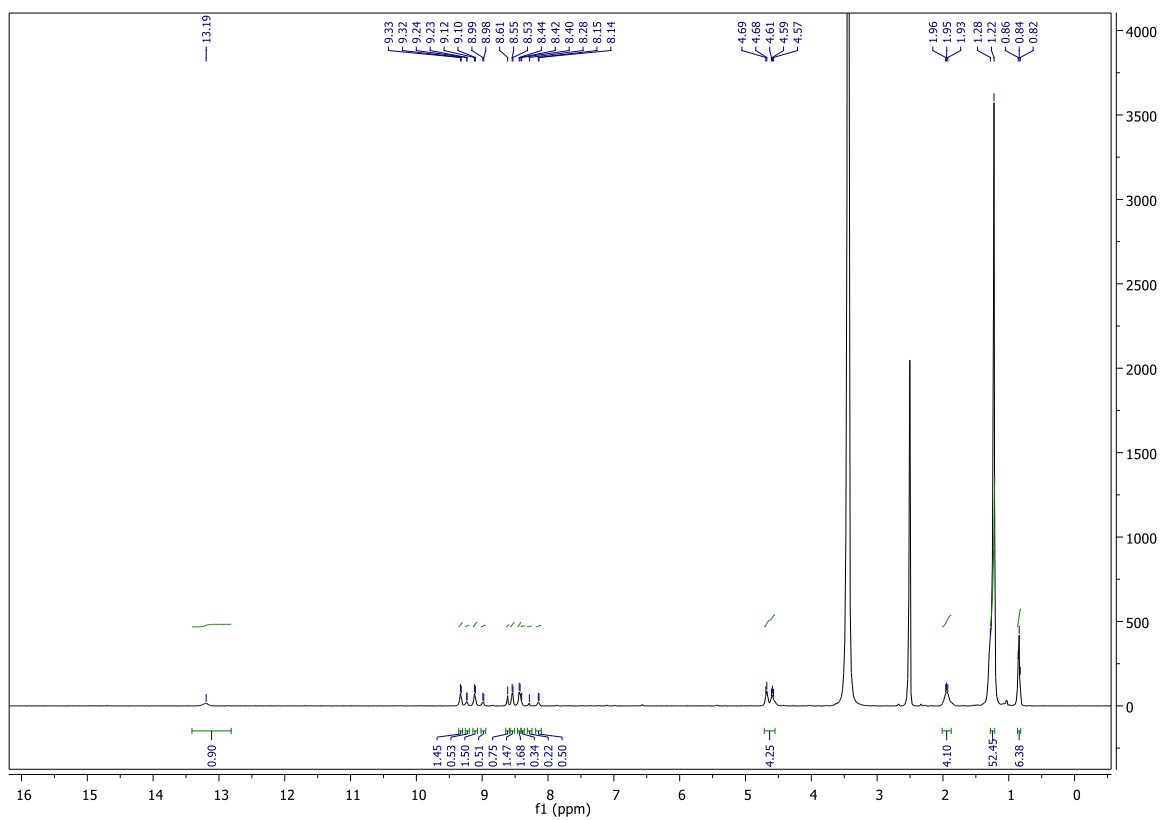

Figure S70:  $^1\text{H}$  NMR of Compound 31

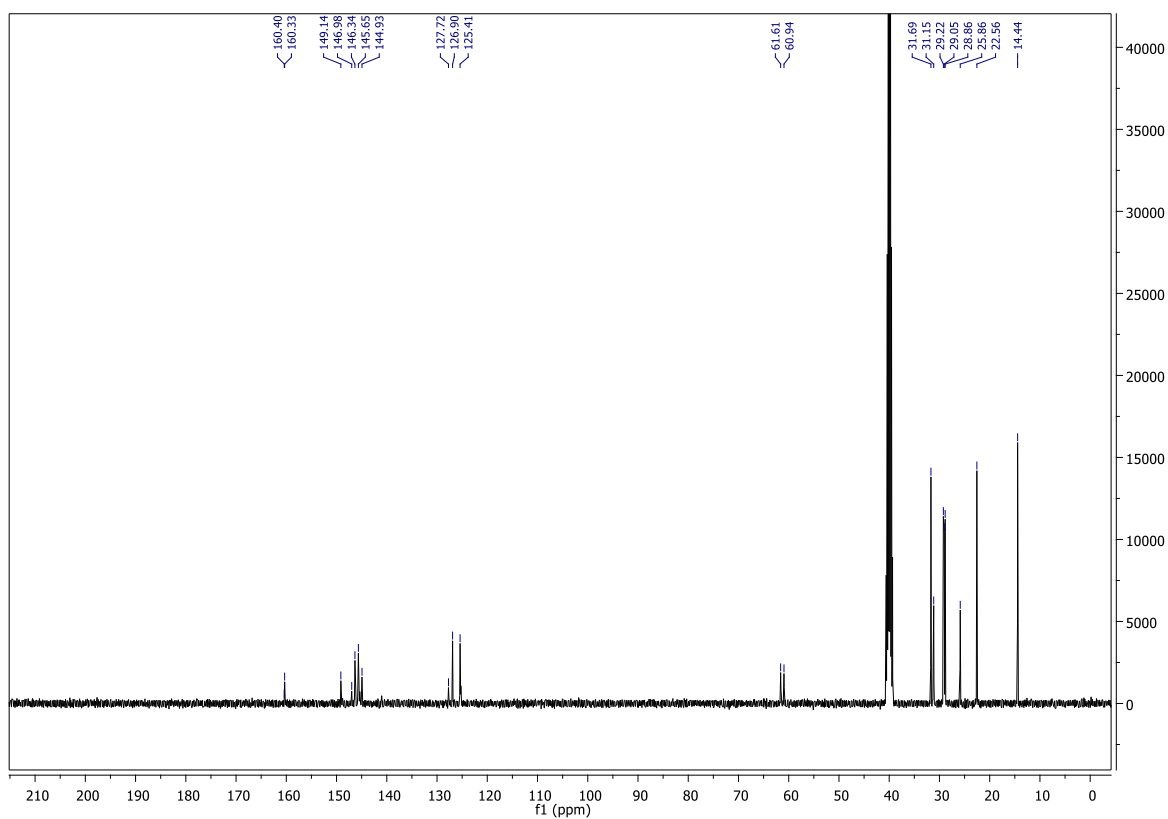

Figure S71: <sup>13</sup>C NMR of Compound 31

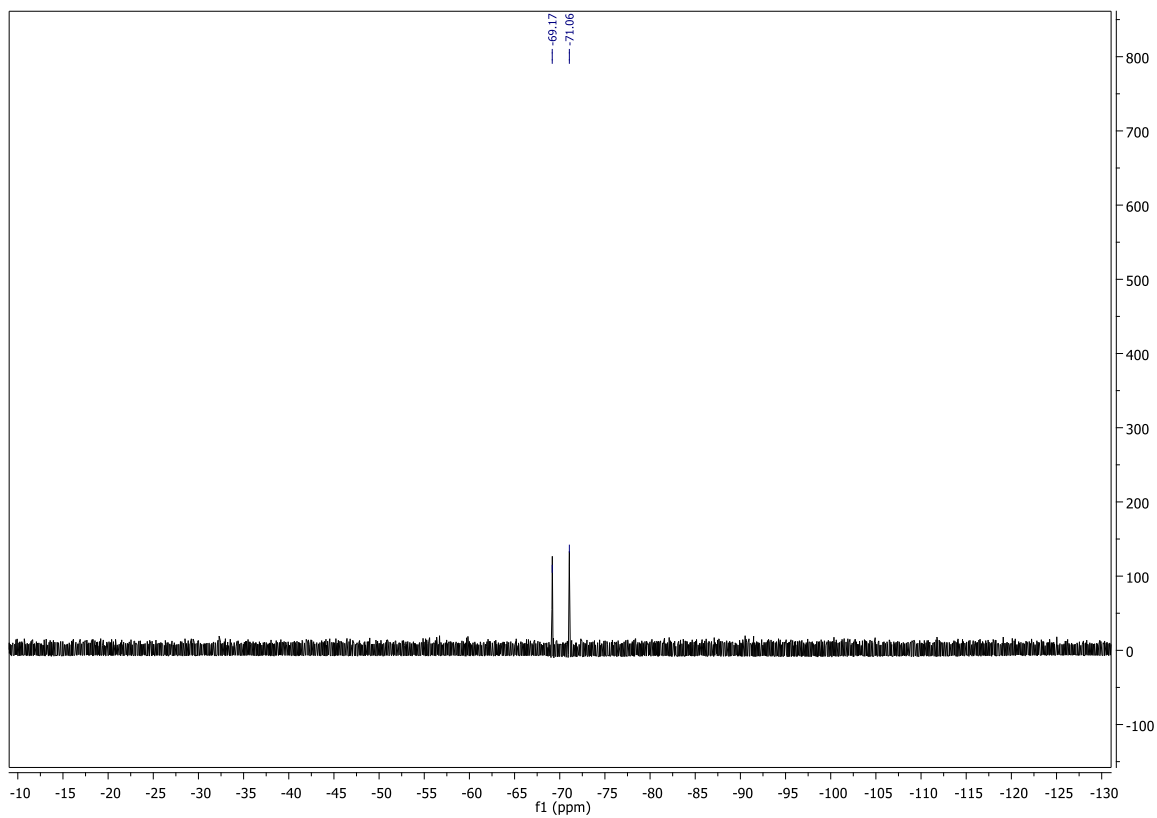

Figure S72: <sup>19</sup>F NMR of Compound 31



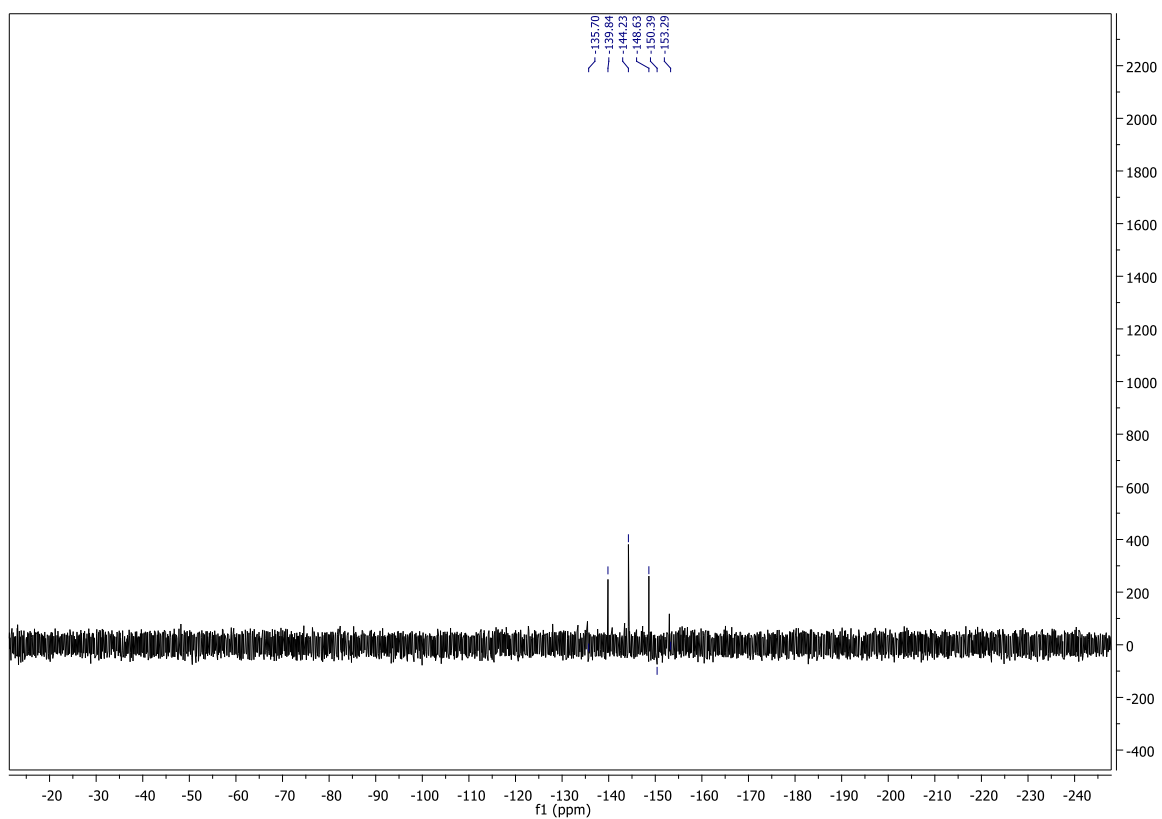

Figure S73:  $^{31}\text{P}$  NMR of Compound 31

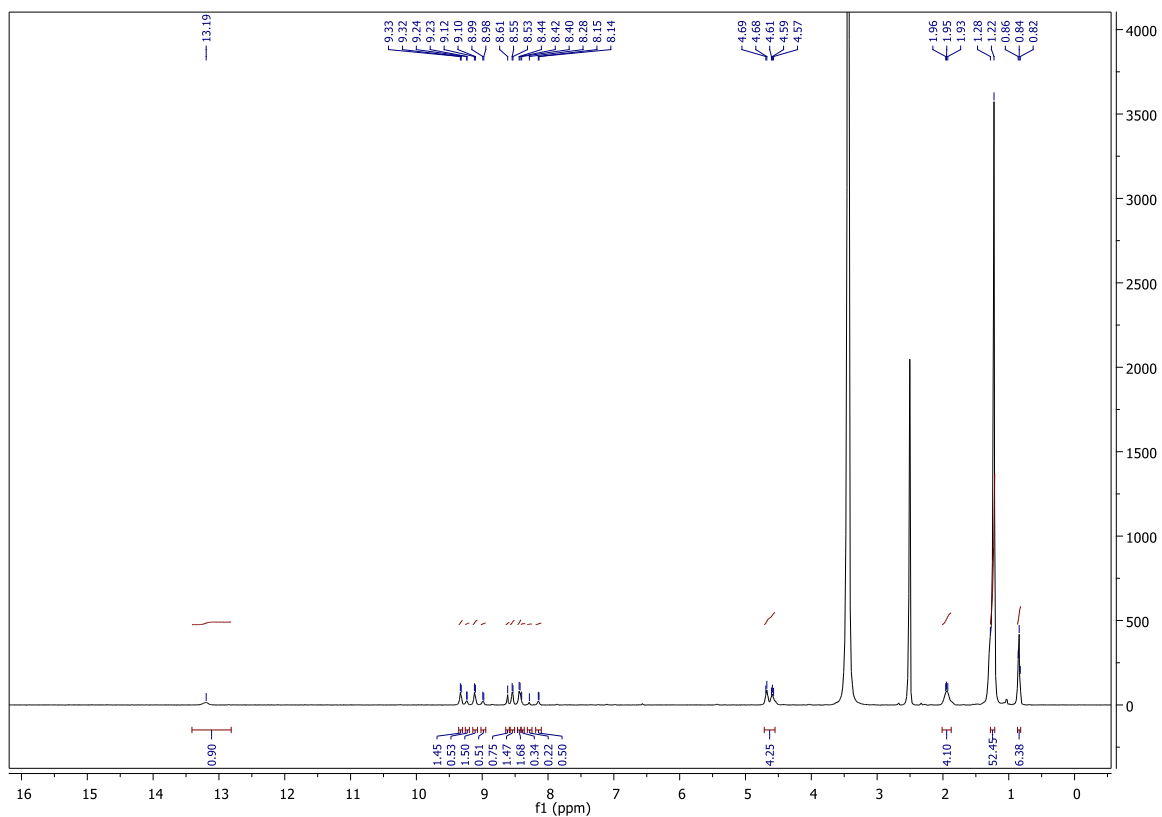

Figure S74:  $^1\text{H}$  NMR of Compound 32



Figure S75: <sup>13</sup>C NMR of Compound 32

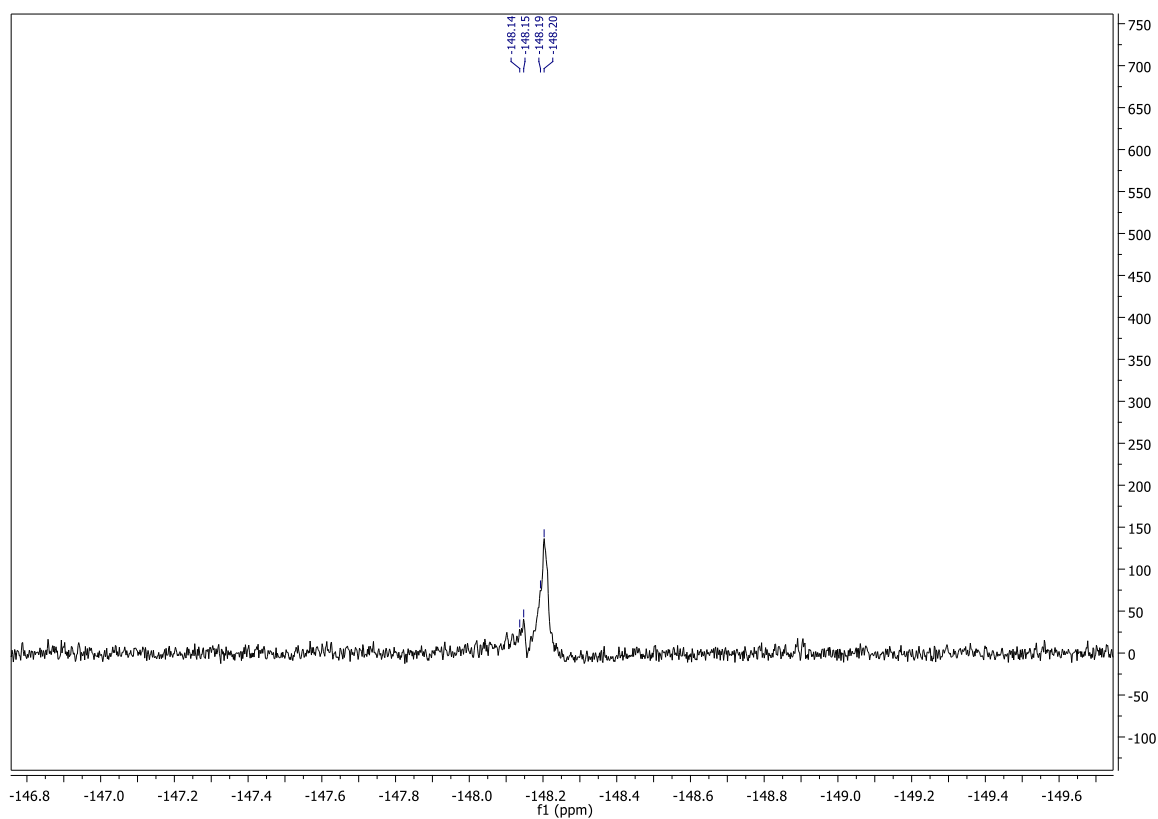

Figure S76: <sup>19</sup>F NMR of Compound 32

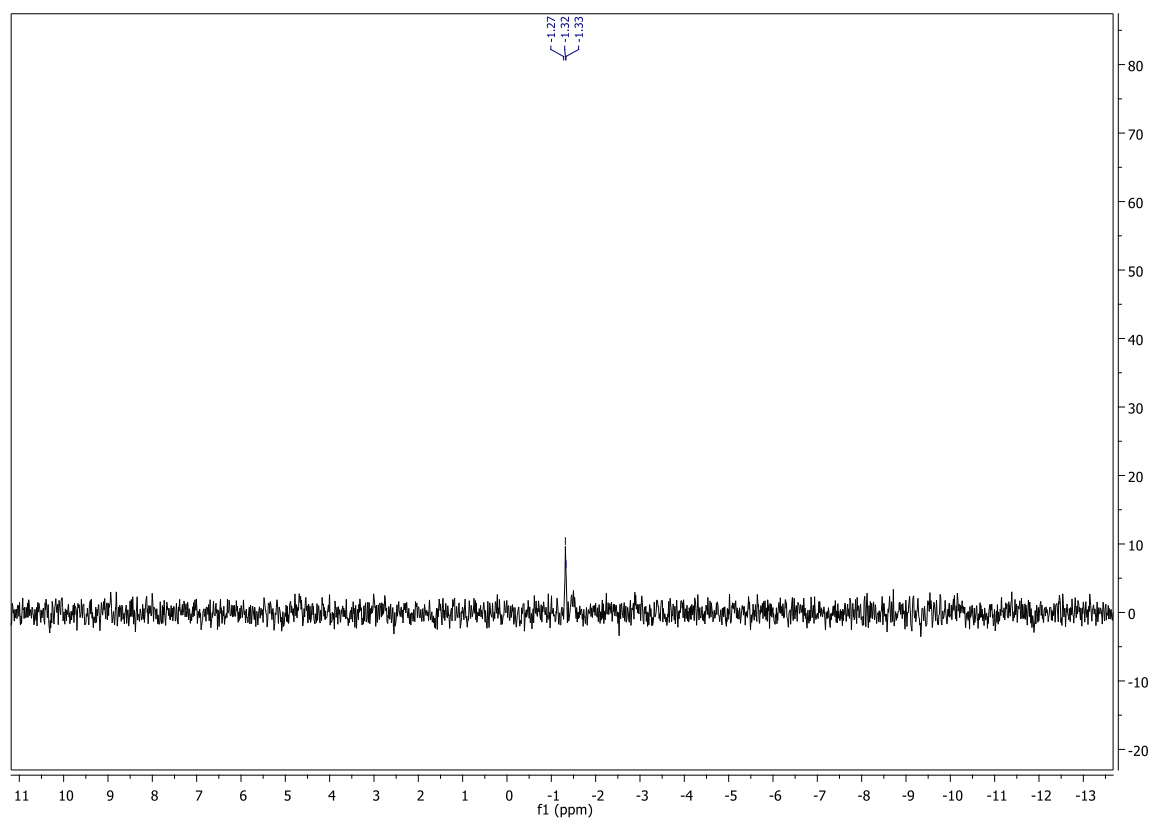

Figure S77: <sup>11</sup>B NMR of Compound 32

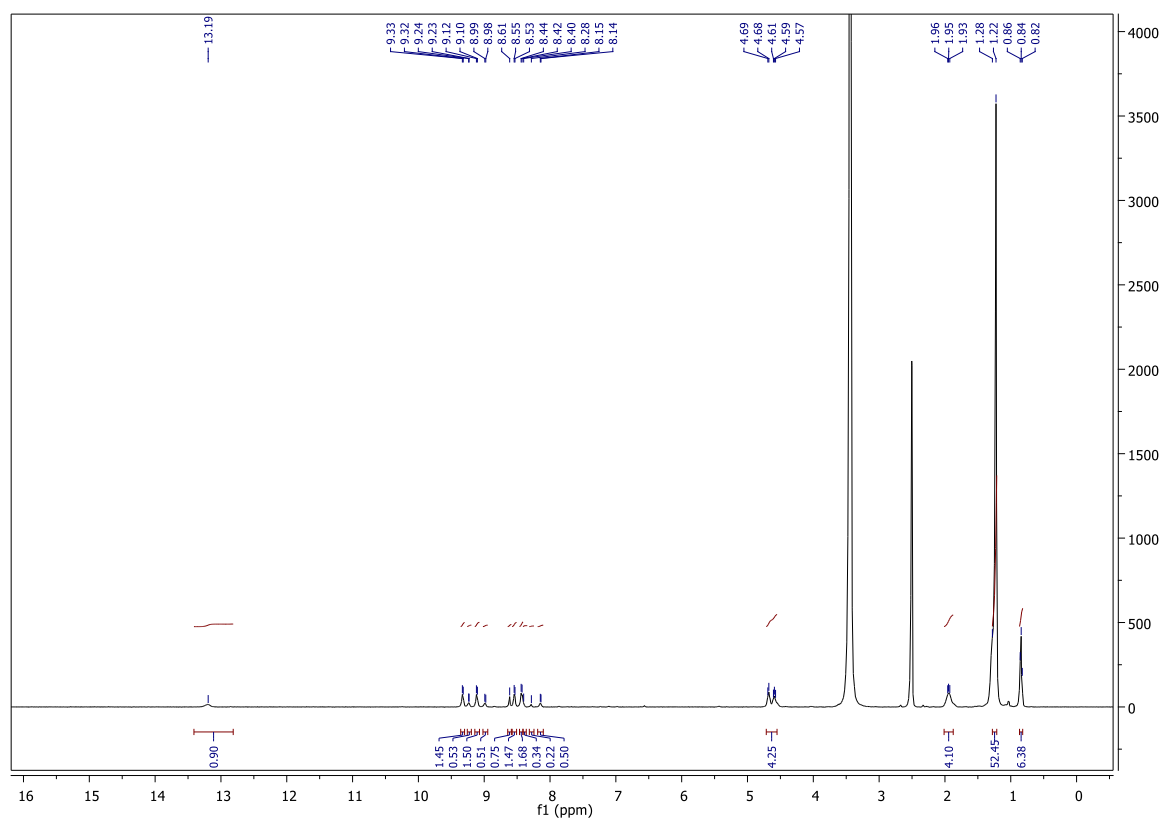

Figure S78: <sup>1</sup>H NMR of Compound 33



Figure S79: <sup>13</sup>C NMR of Compound 33

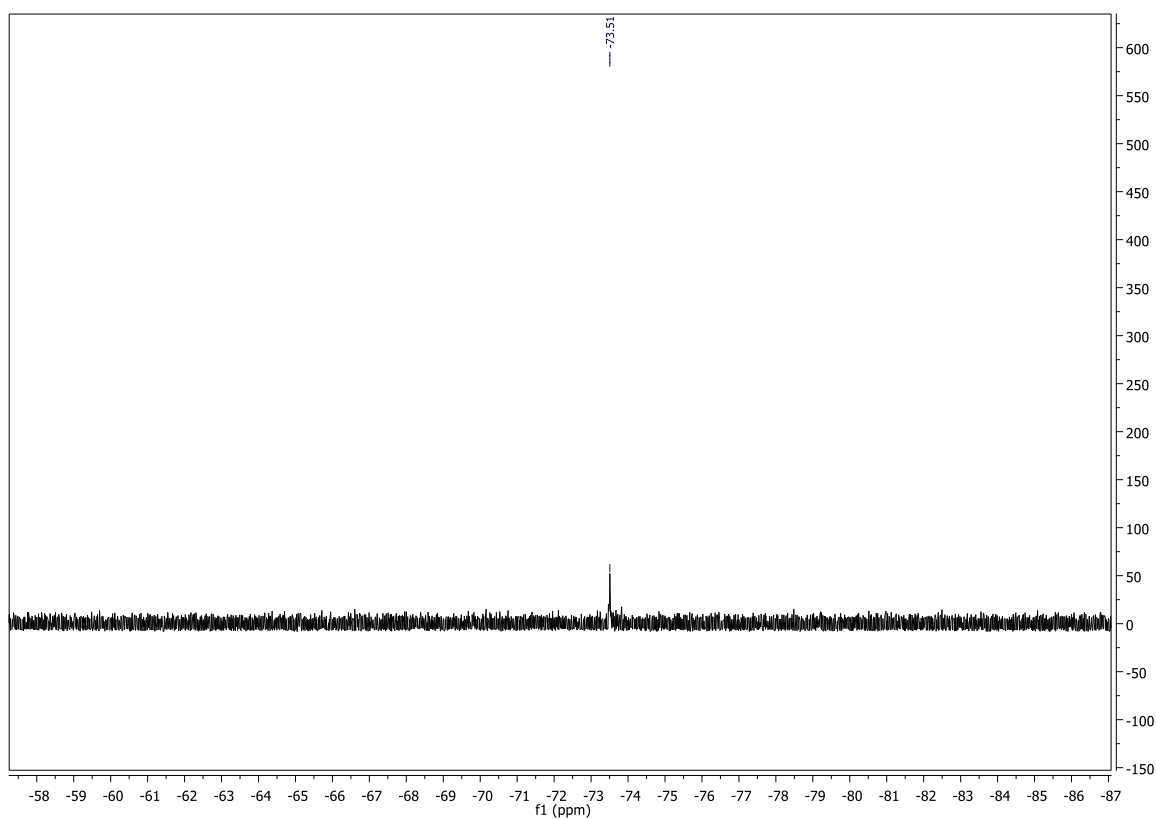

Figure S80: <sup>19</sup>F NMR of Compound 33

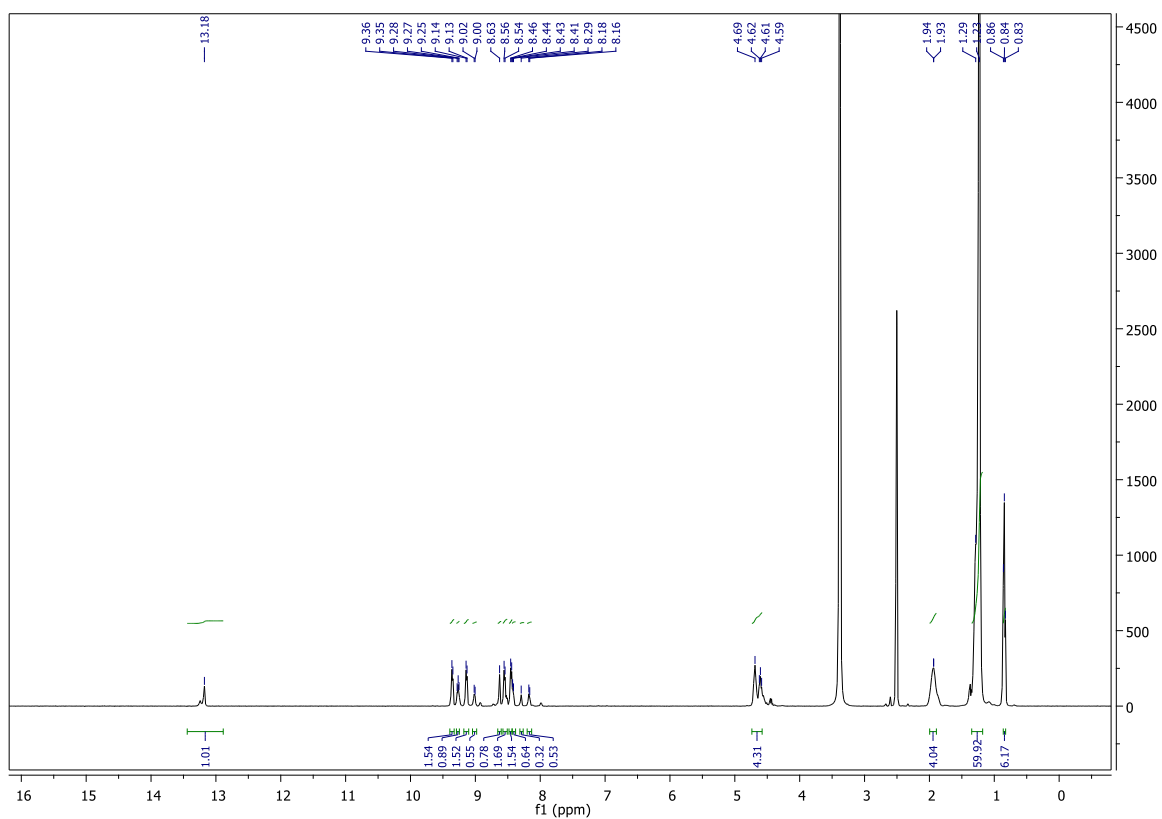

Figure S81:  $^1\text{H}$  NMR of Compound 34

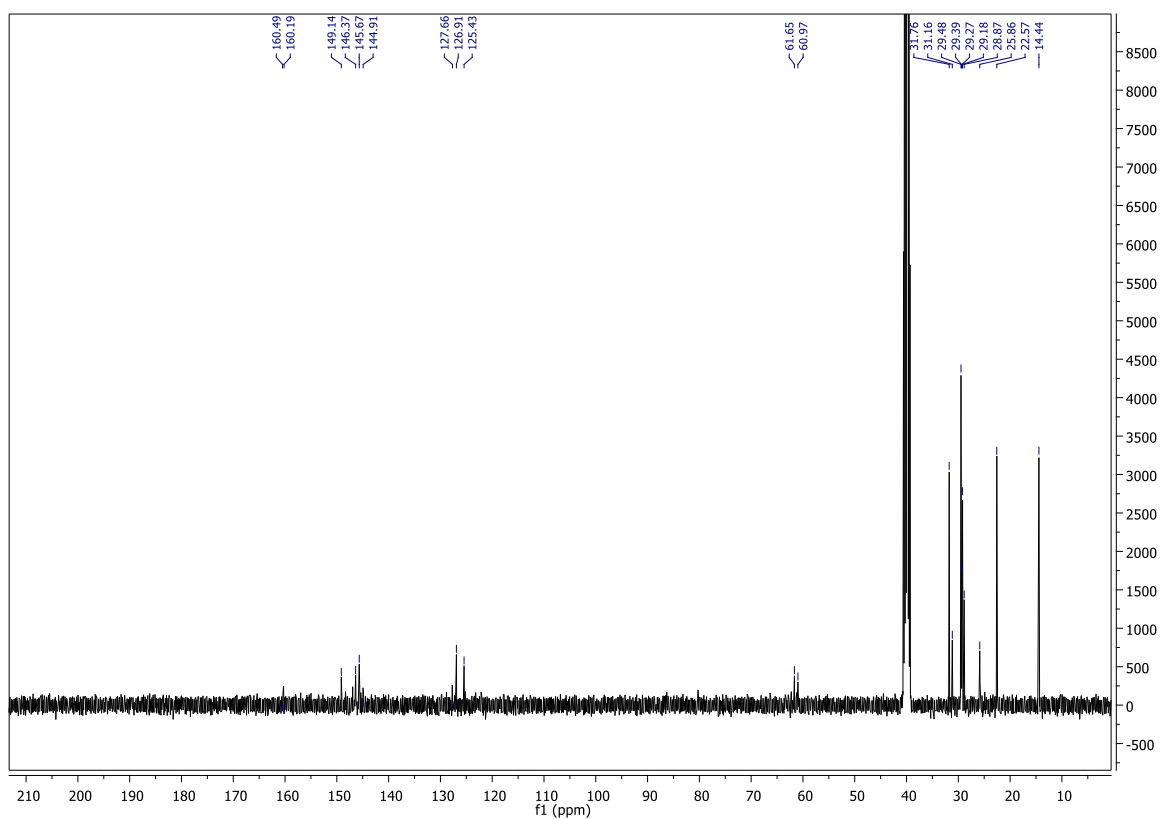

Figure S82:  $^{13}\text{C}$  NMR of Compound 34

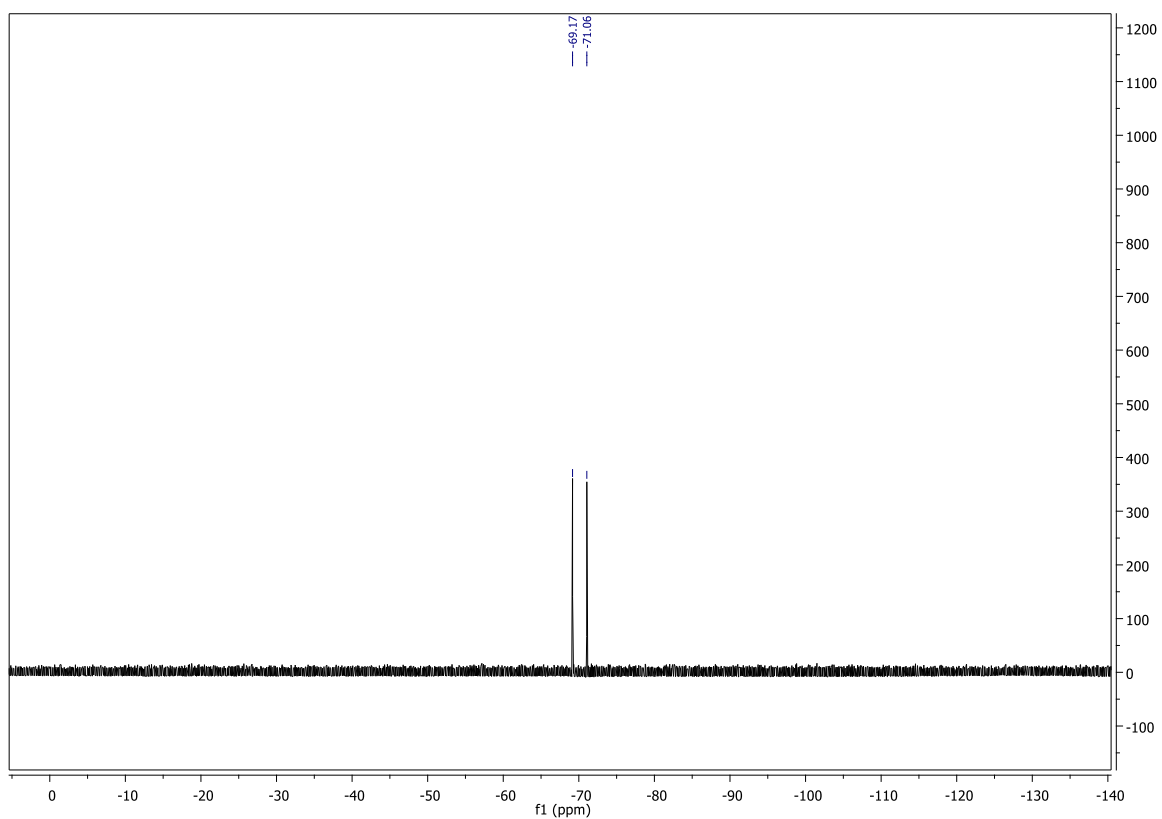

Figure S83:  $^{19}\text{F}$  NMR of Compound 34

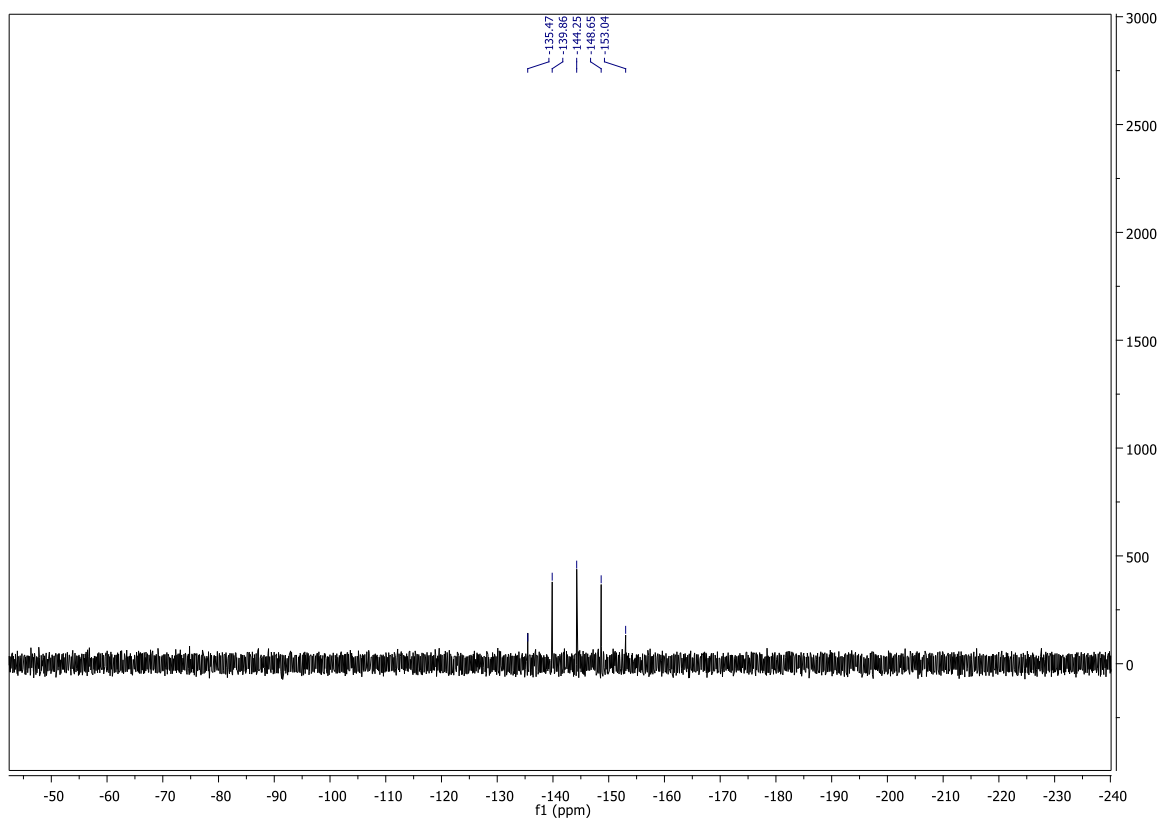

Figure S84:  $^{31}\text{P}$  NMR of Compound 34

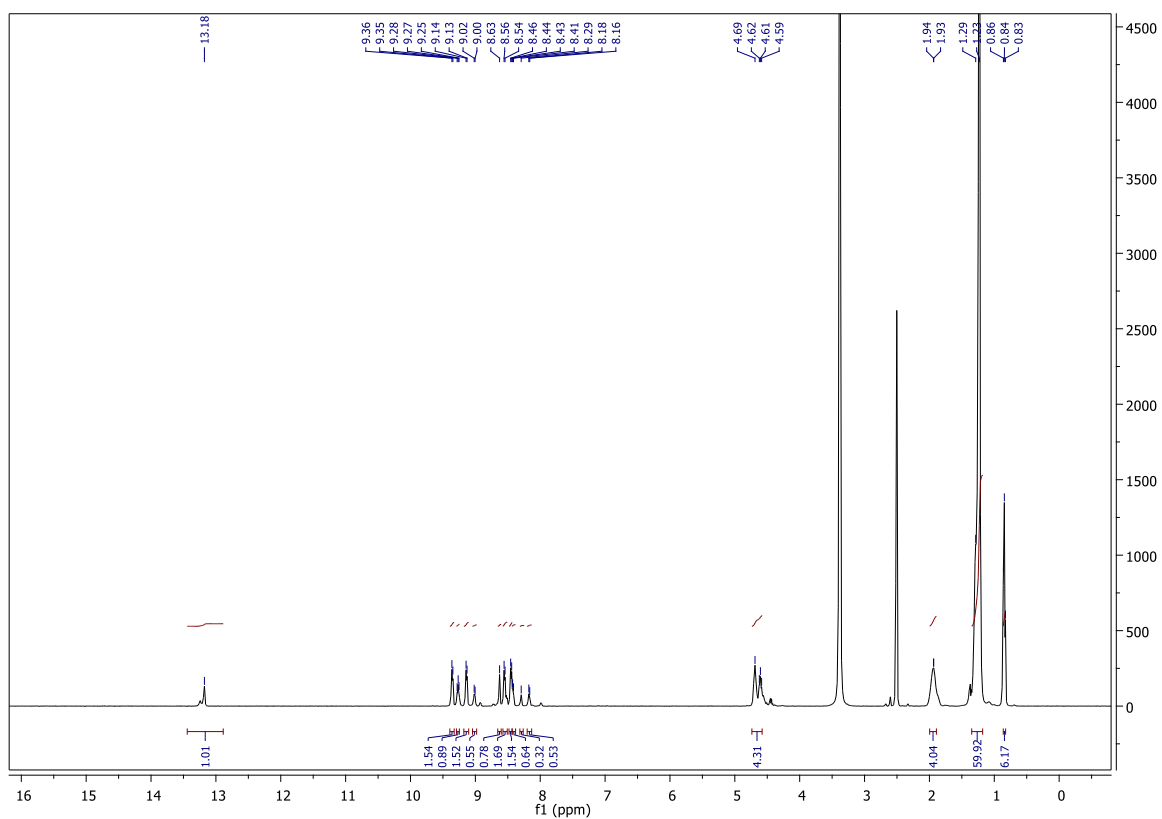

Figure S85:  $^1\text{H}$  NMR of Compound 35



Figure S86:  $^{13}\text{C}$  NMR of Compound 35

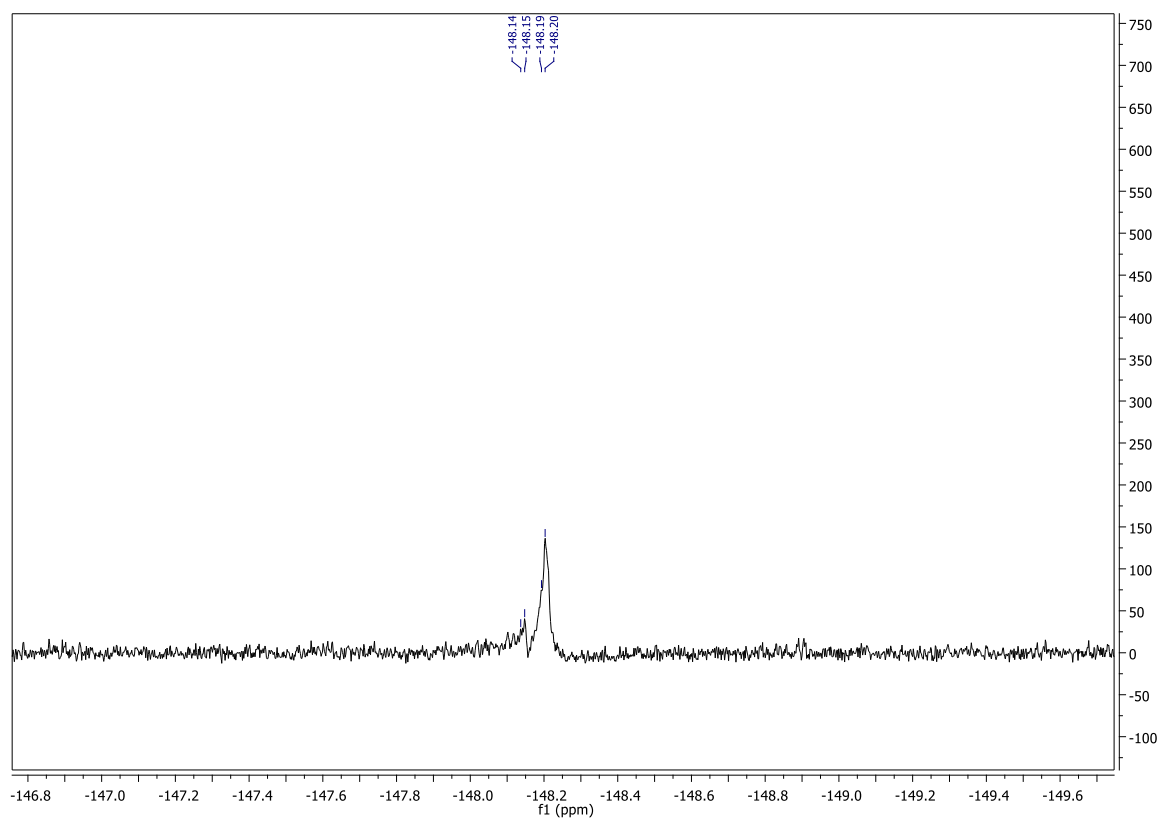

Figure S87:  $^{19}\text{F}$  NMR of Compound 35

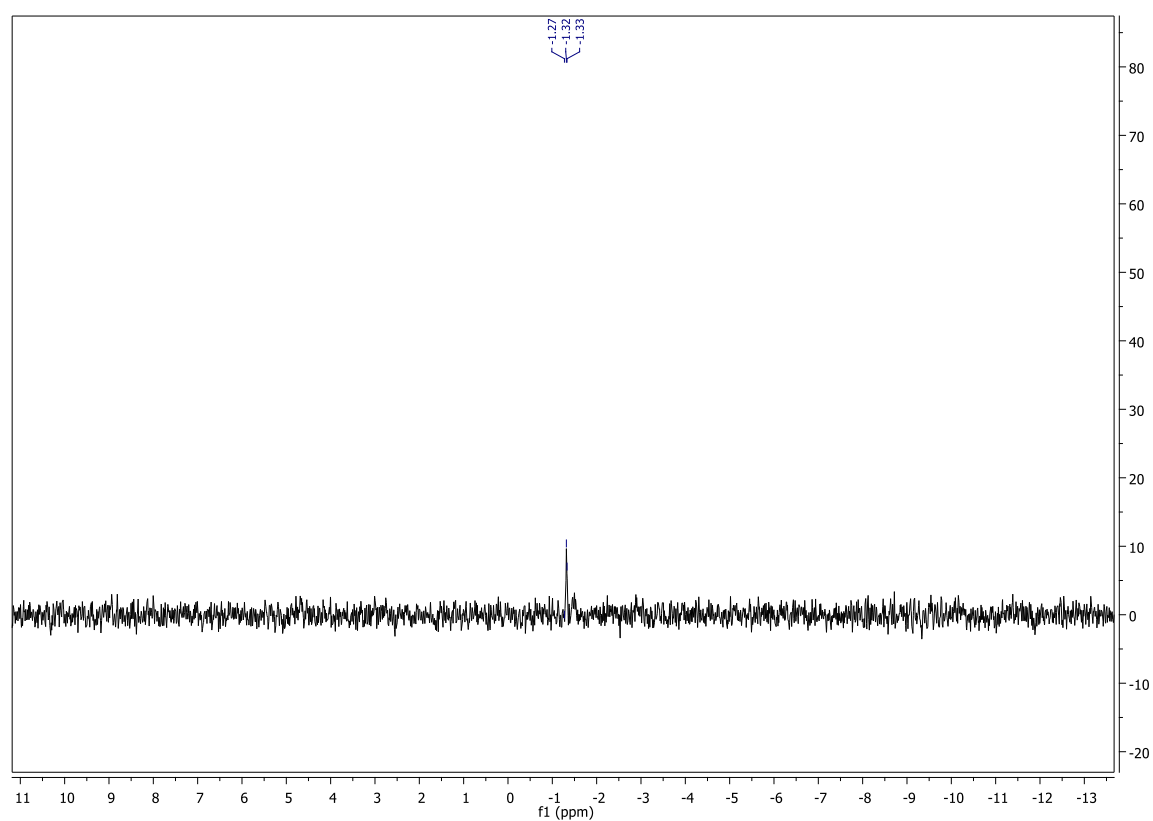

Figure S88:  $^{11}\text{B}$  NMR of Compound 35



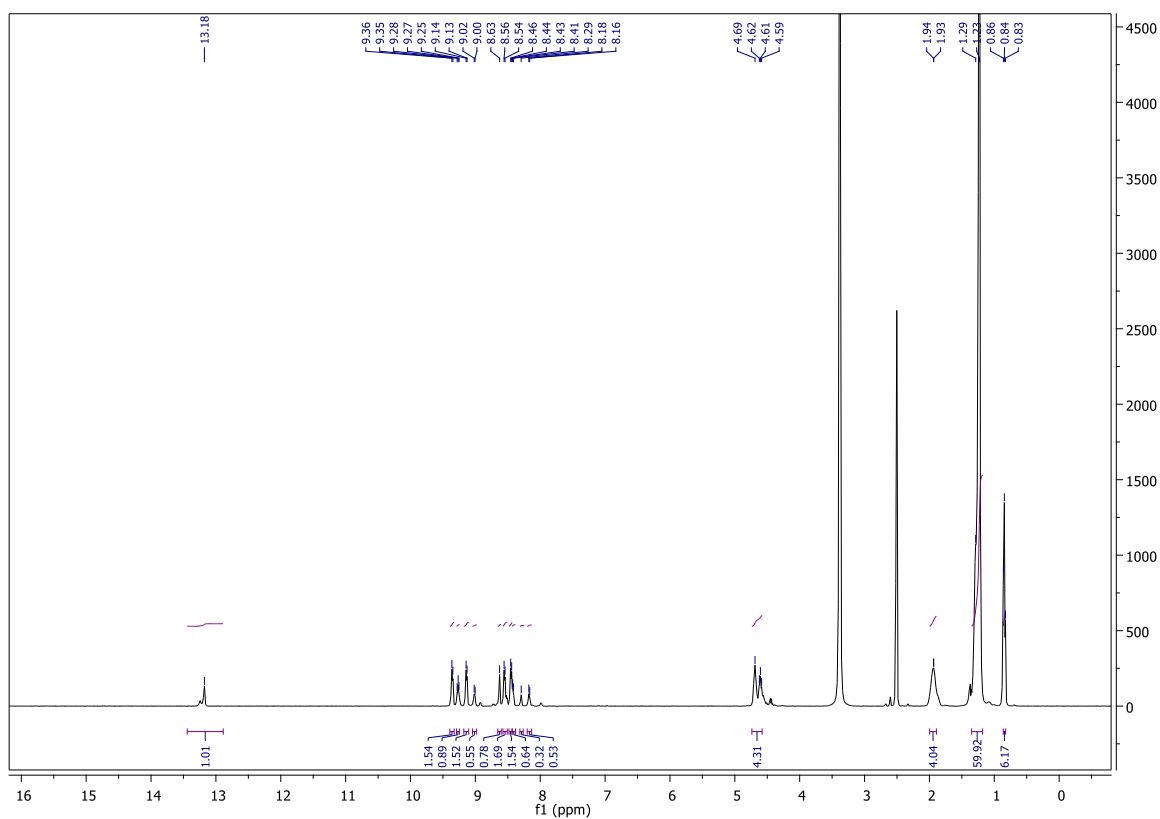

Figure S89:  $^1\text{H}$  NMR of Compound 36

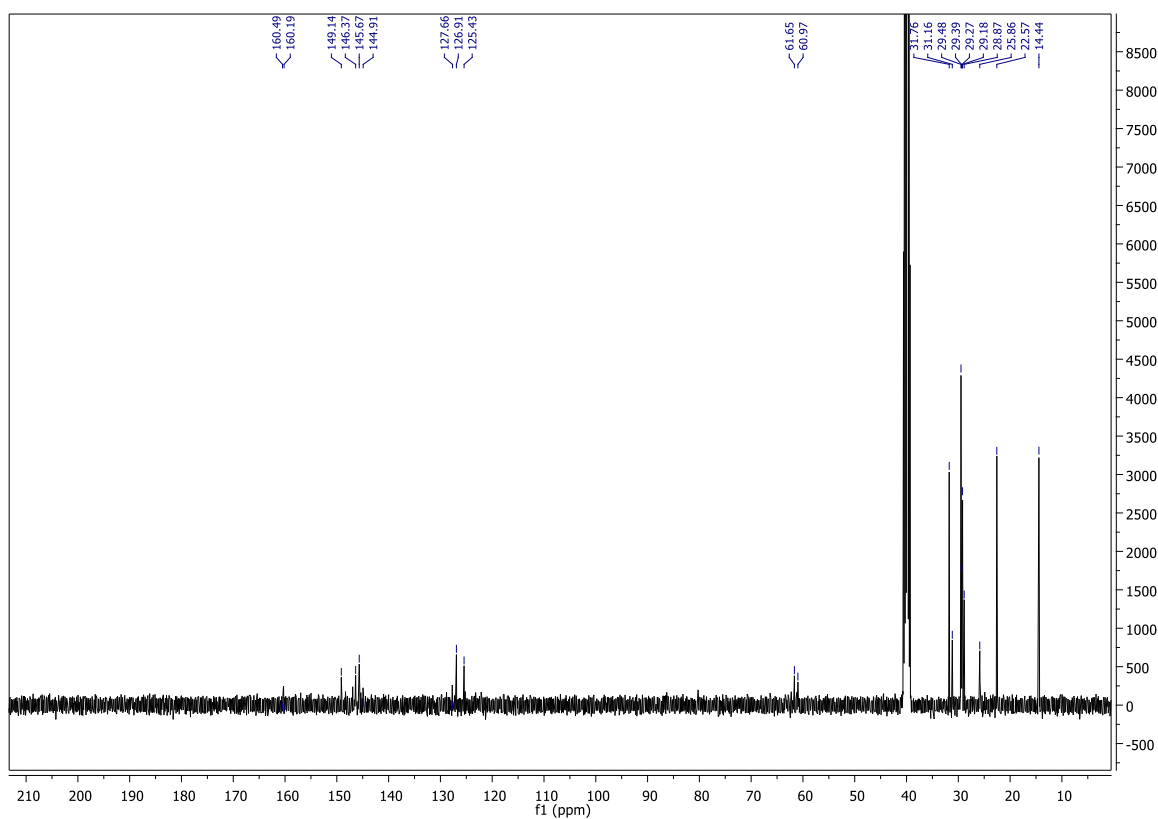

Figure S90:  $^{13}\text{C}$  NMR of Compound 36

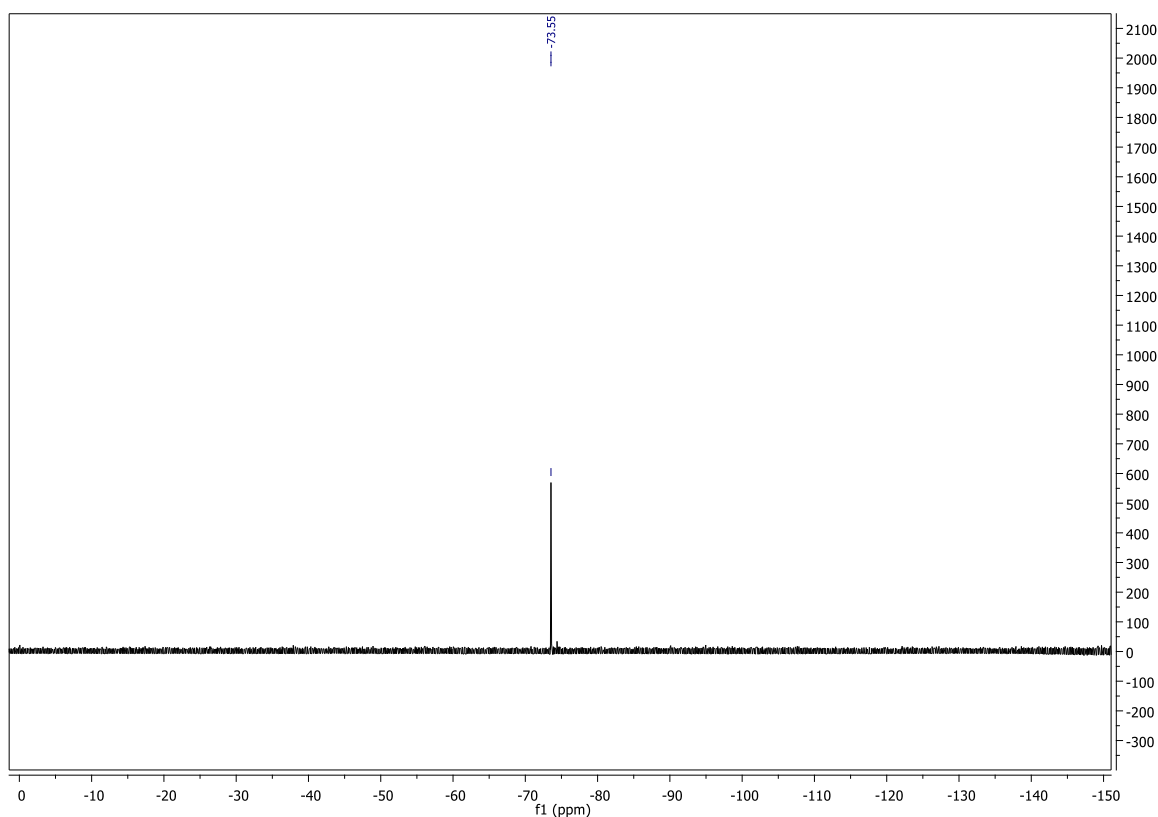

**Figure S91:  $^{19}\text{F}$  NMR of Compound 36**

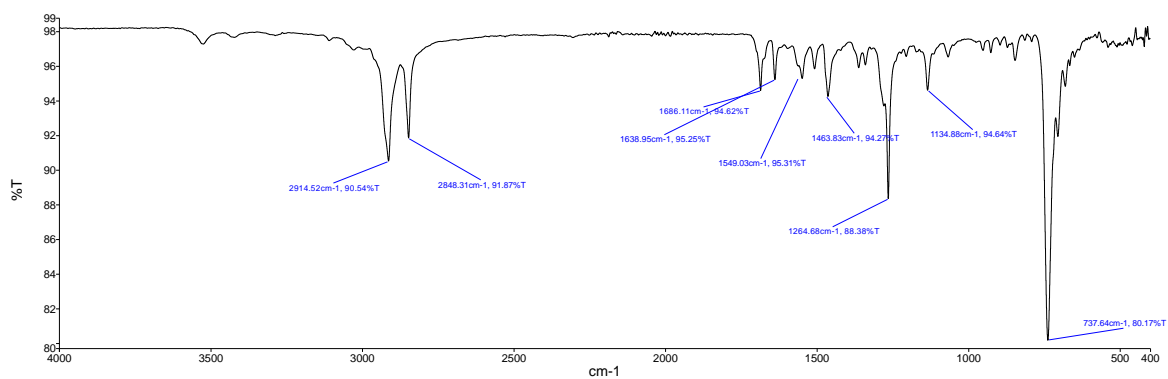

**Figure S92: IR of Compound 9**

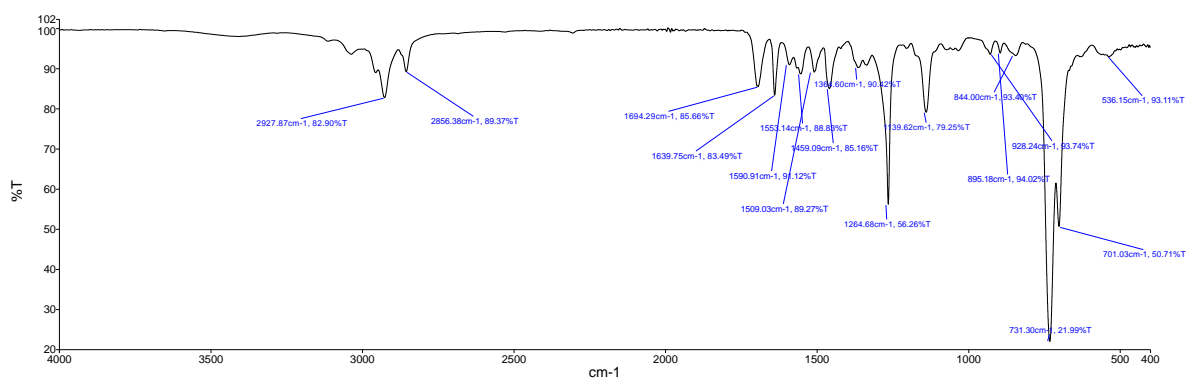

**Figure S93: IR of Compound 10**

#### 4. Thermograms data

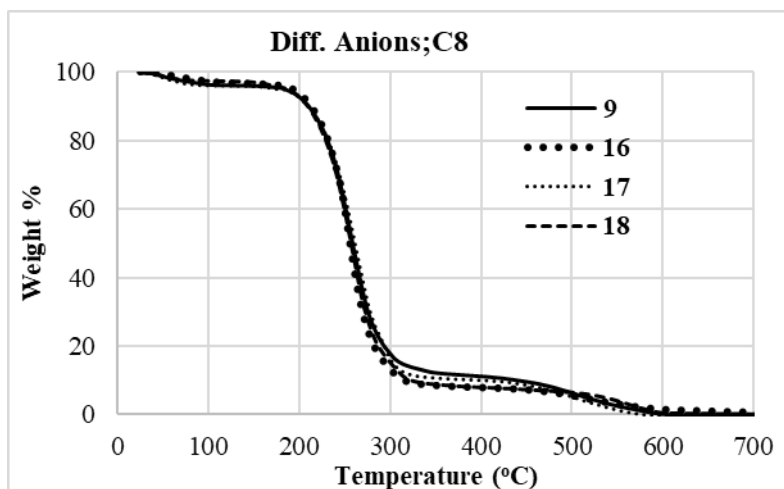

Figure S94: Thermograms of compounds 9 and 16-18.

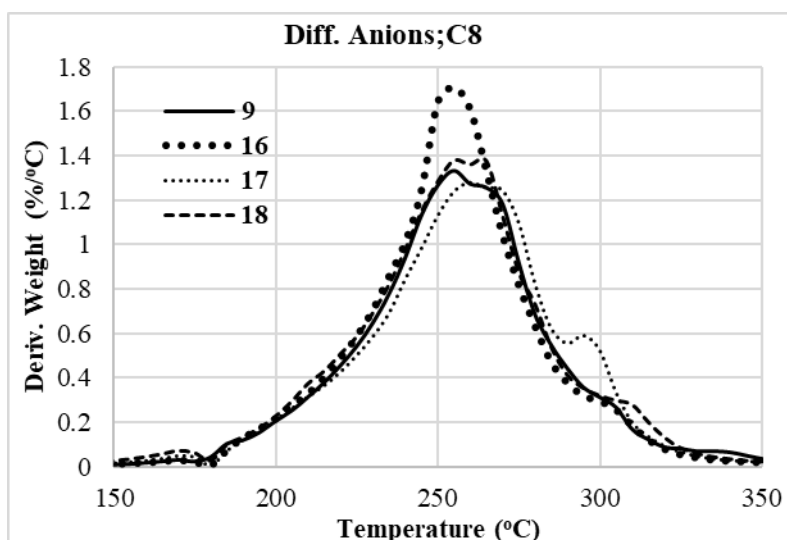

Figure S95: DTG curves of compounds 9 and 16-18

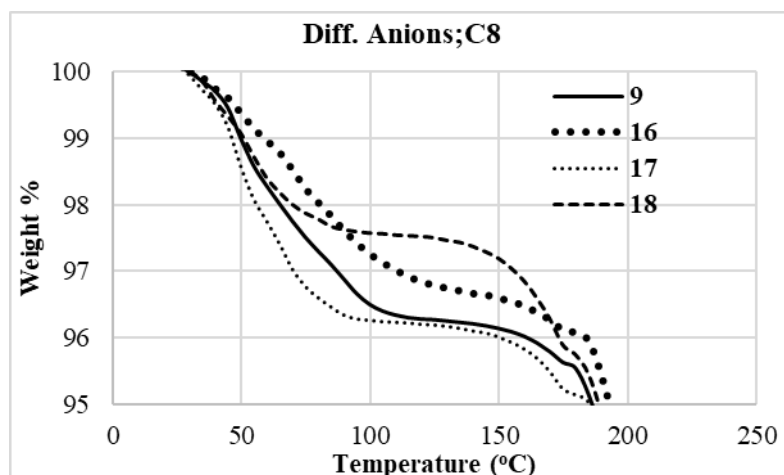

Figure S96: Initial temperature range in TGA of compounds 9 and 16-18

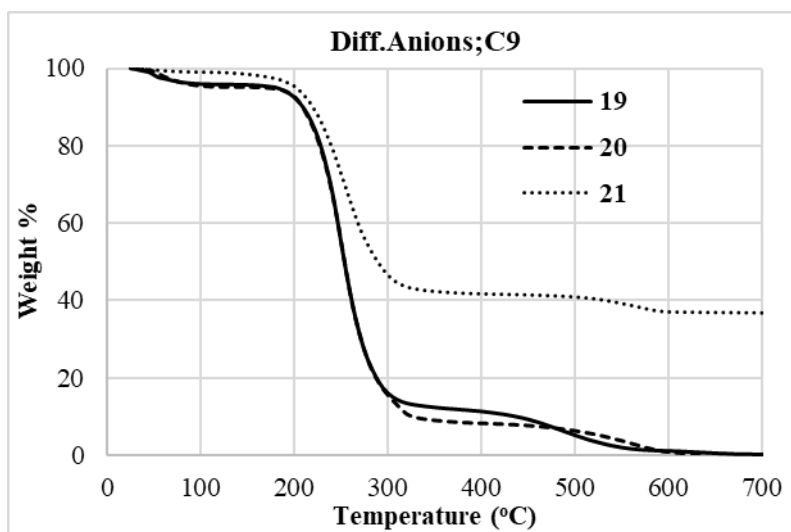

Figure S97: Thermograms of compounds 19-21.

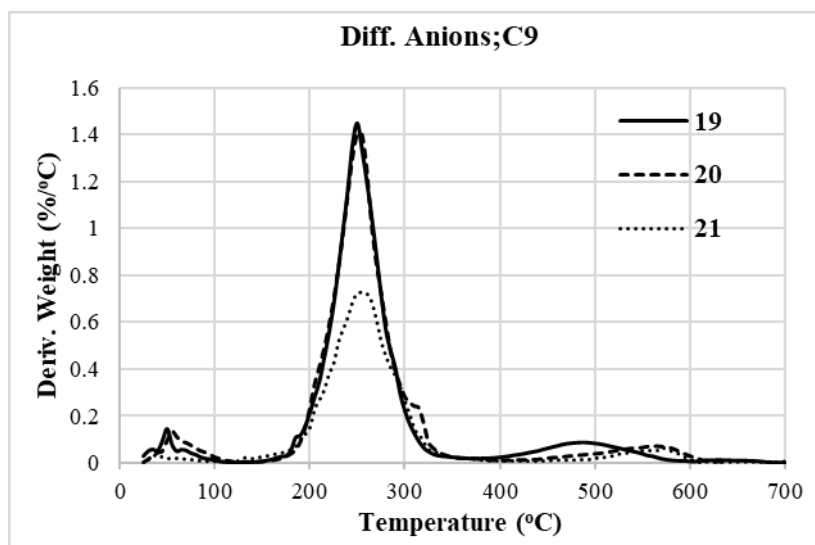

Figure S98: DTG curves compounds 19-21

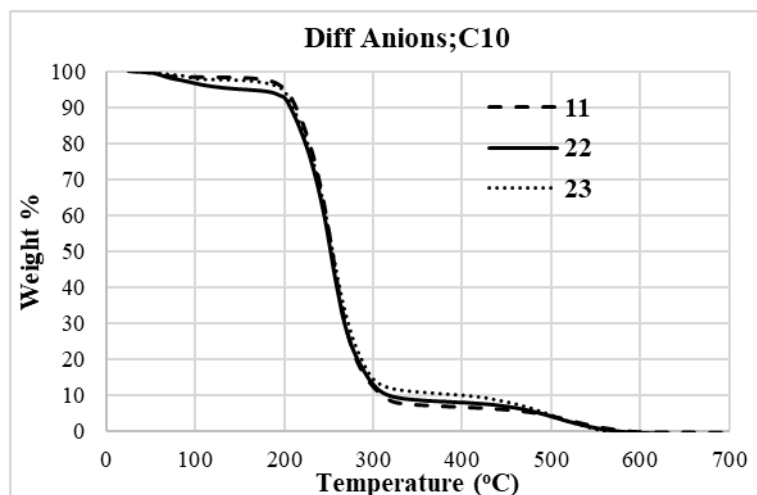

Figure S99: Thermograms of compounds 11 and 22-23

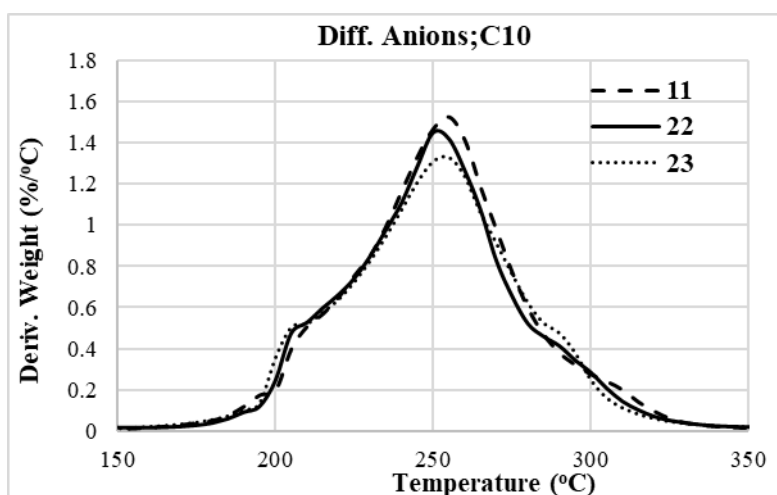

Figure S100: DTG curves compounds 11 and 22-23

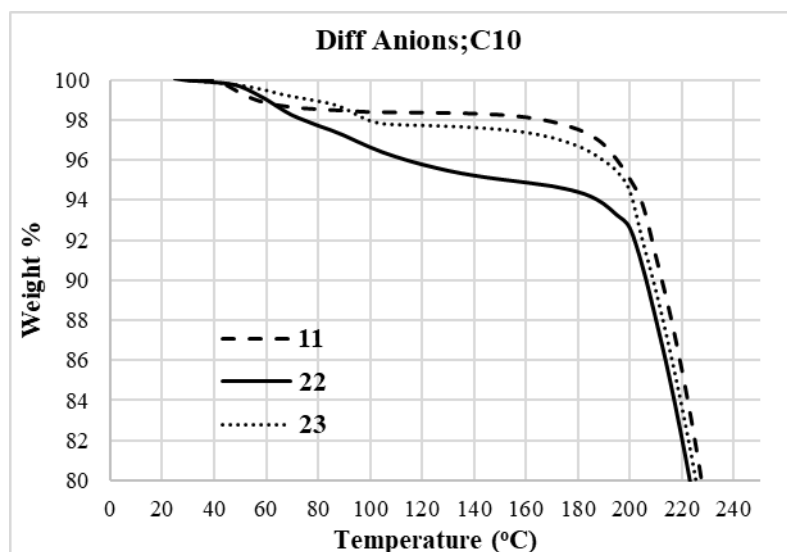

Figure S101: Initial temperature range in TGA of compounds 11 and 22-23

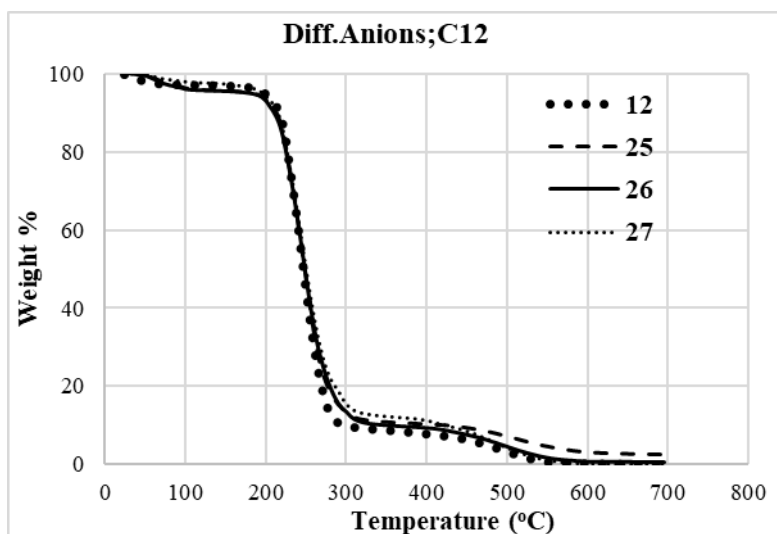

**Figure S102:** Thermograms of compounds 12 and 25-27

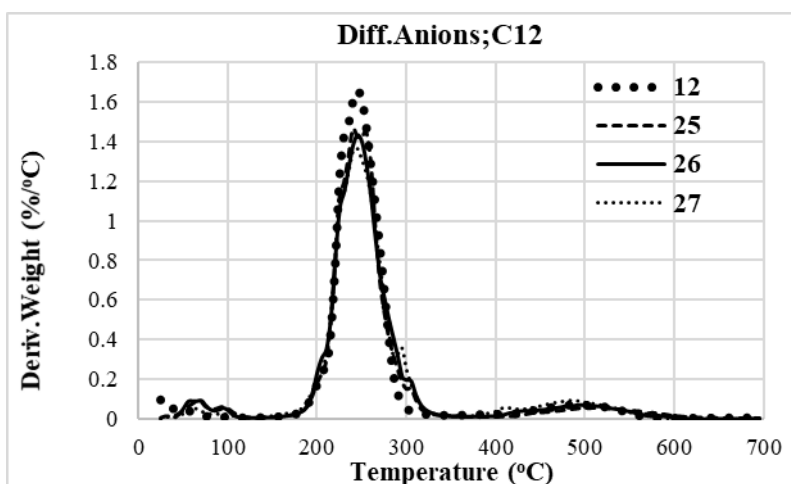

**Figure S103:** DTG curves compounds 12 and 25-27

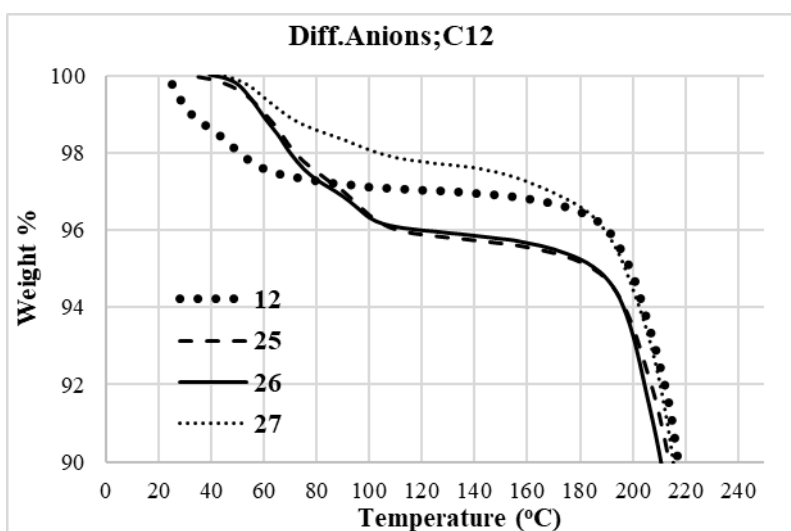

**Figure S104:** Initial temperature range in TGA of compounds 12 and 25-27

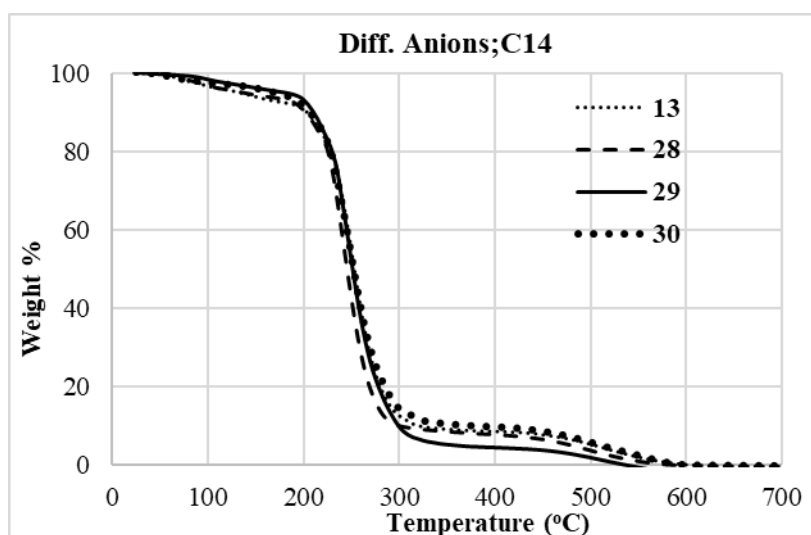

Figure S105: Thermograms of compounds 13 and 28-30

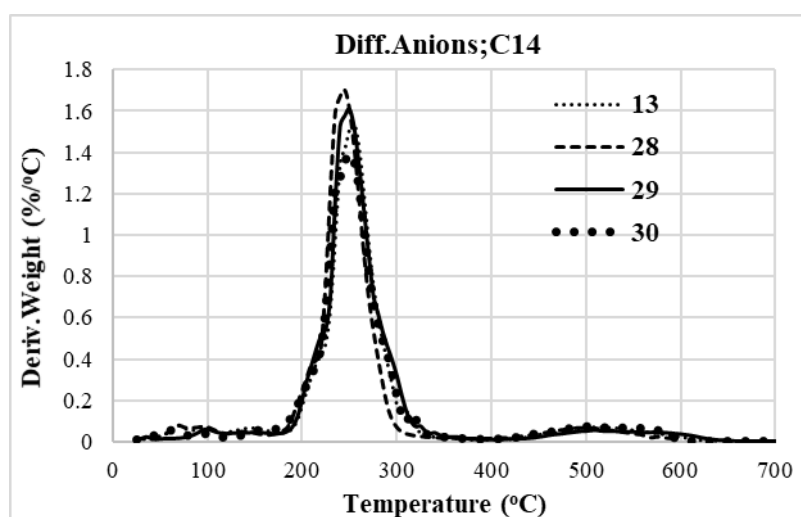

Figure S106: DTG curves compounds 13 and 28-30

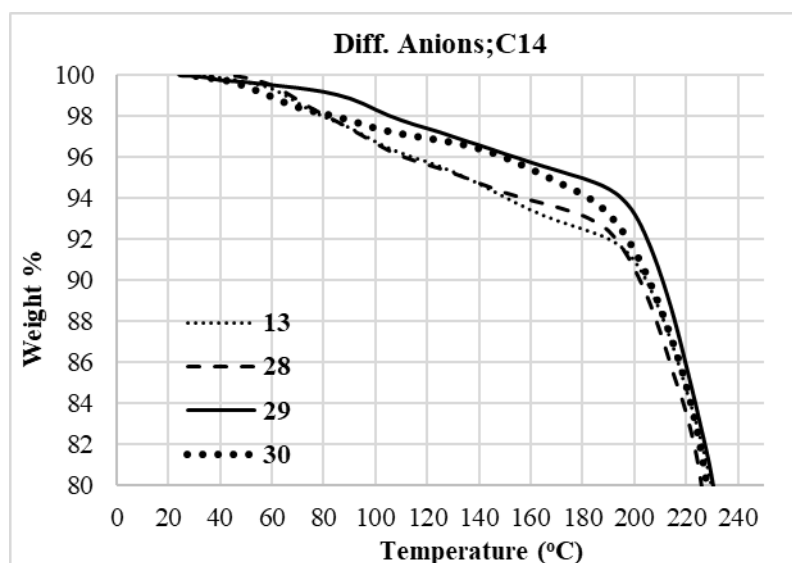

Figure S107: Initial temperature range in TGA of compounds 13 and 28-30

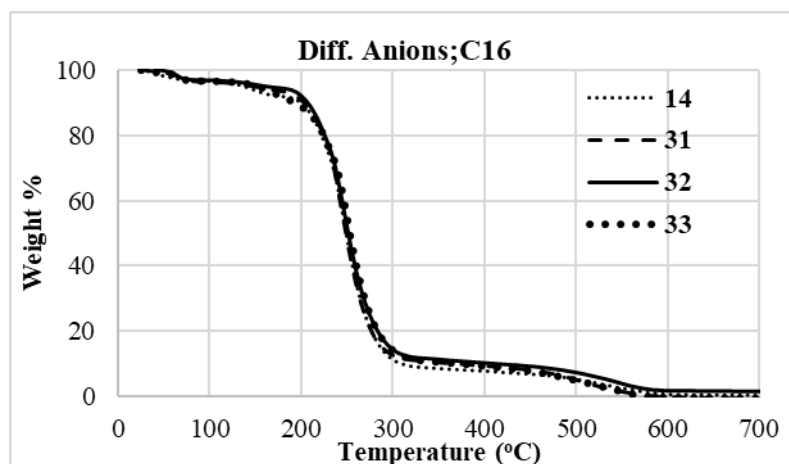

Figure S108: Thermograms of compounds 14 and 31-33

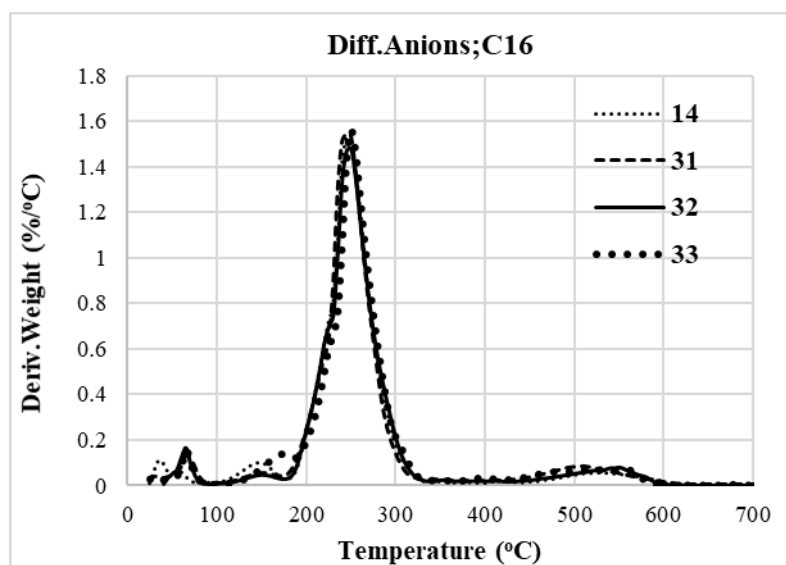

Figure S109: DTG curves compounds 14 and 31-33

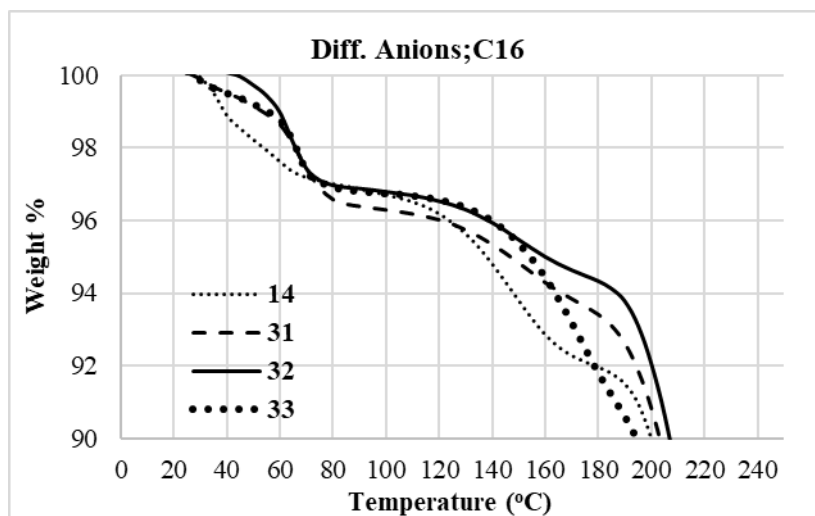

Figure S110: Initial temperature range in TGA of compounds 14 and 31-33



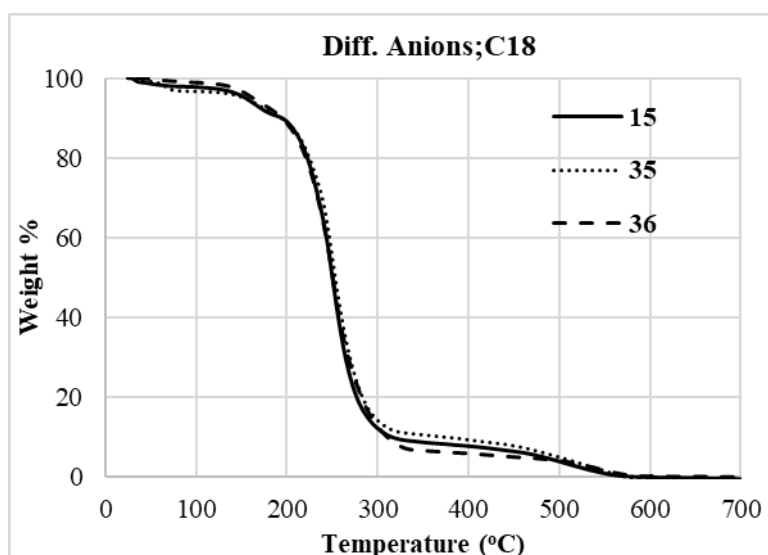

Figure S111: Thermograms of compounds 15 and 35-36

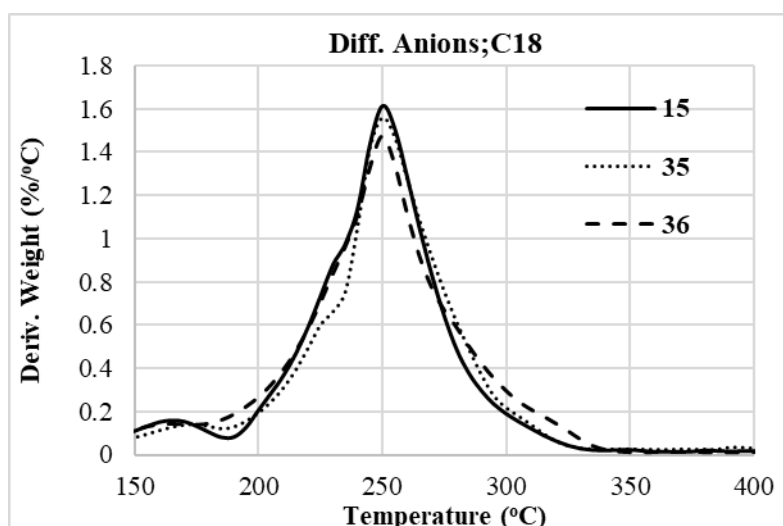

Figure S112: DTG curves compounds 15 and 35-36

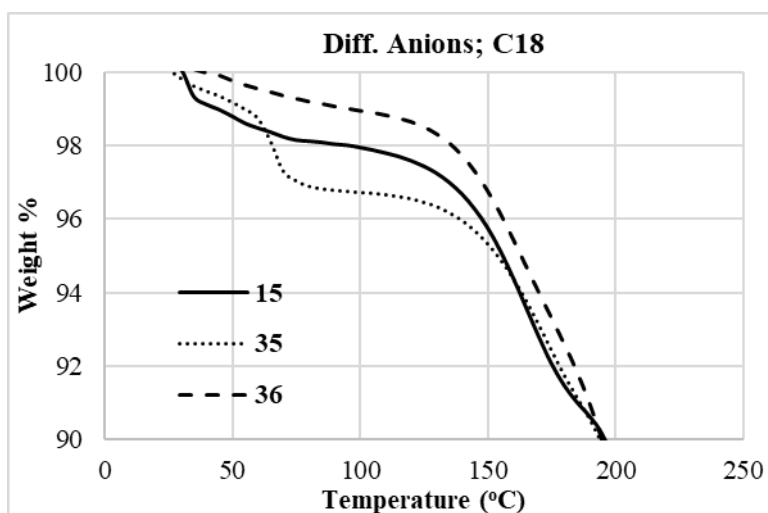

Figure S113: Initial temperature range in TGA of compounds 15 and 35-36

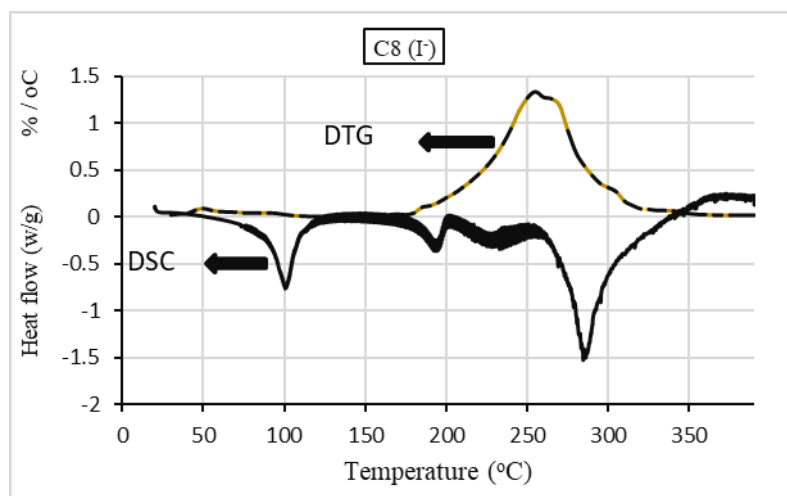

Figure S114: DTG/DSC curves of compound 9

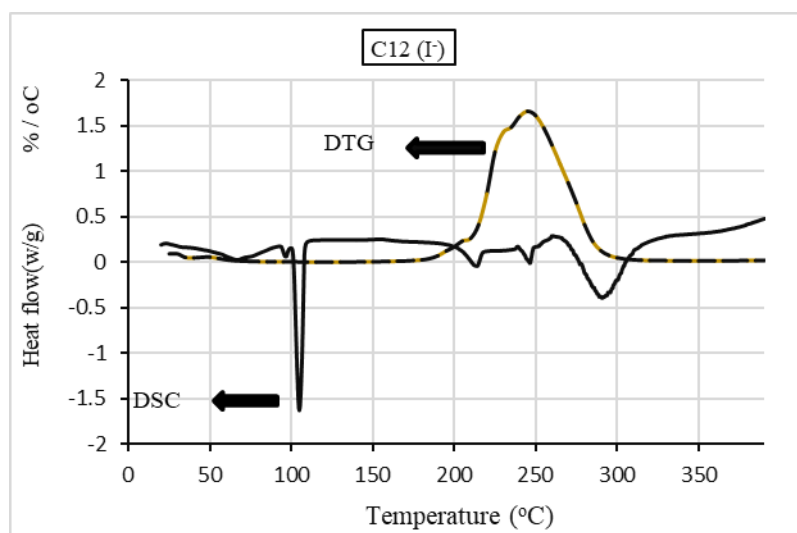

Figure S115: DTG/DSC curves of compound 12

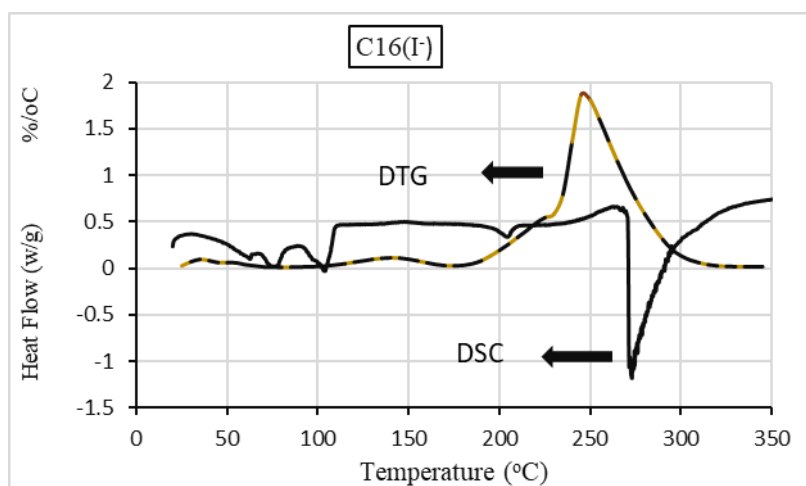

Figure S116: DTG/DSC curves of compound 14

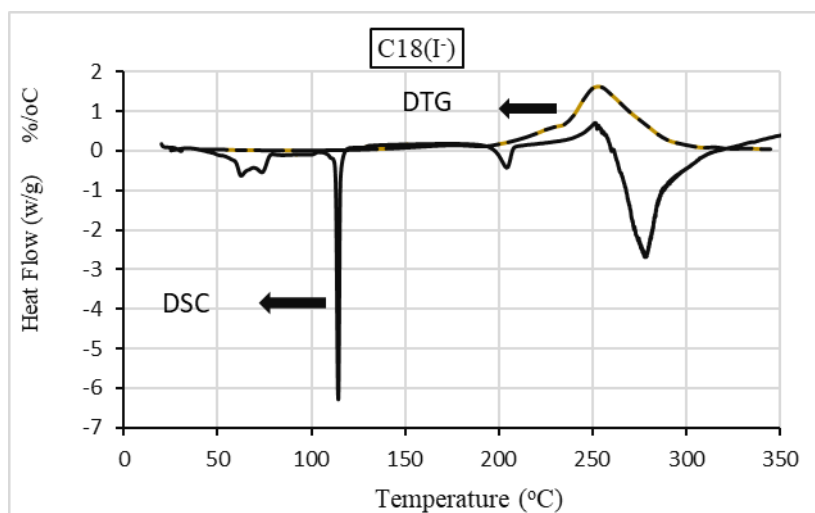

Figure S117: DTG/DSC curves of compound 15

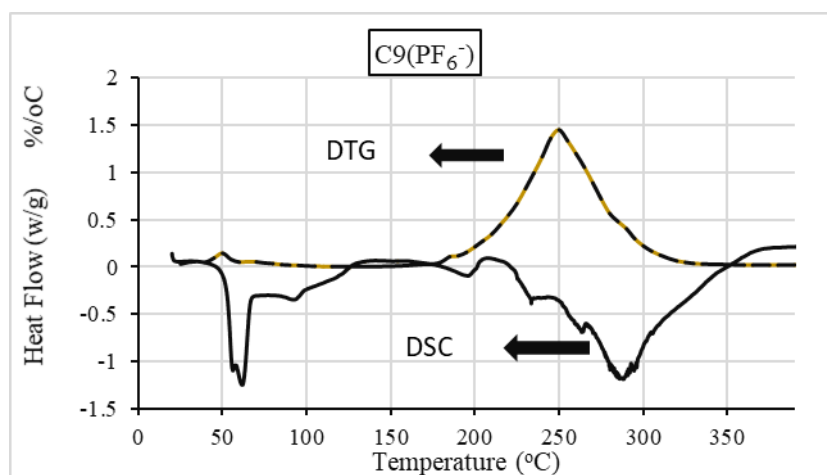

Figure S118: DTG/DSC curves of compound 15

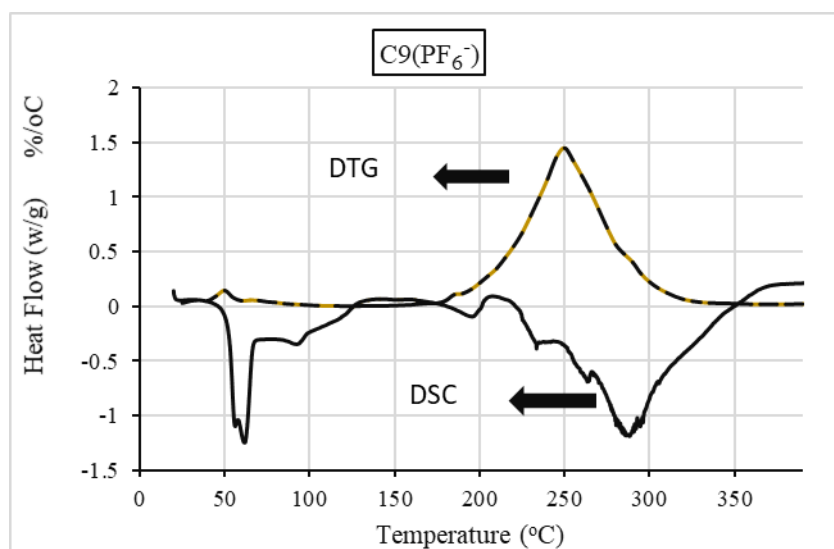

Figure S119: DTG/DSC curves of compound 19

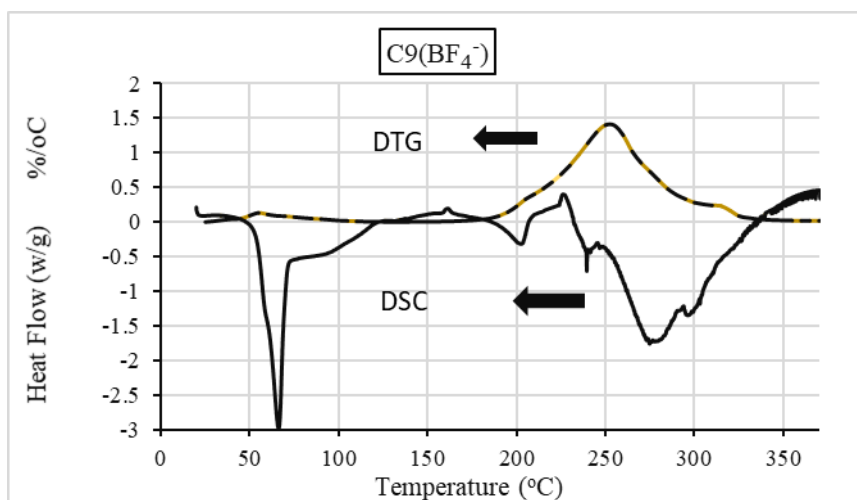

**Figure S120:** DTG/DSC curves of compound 20

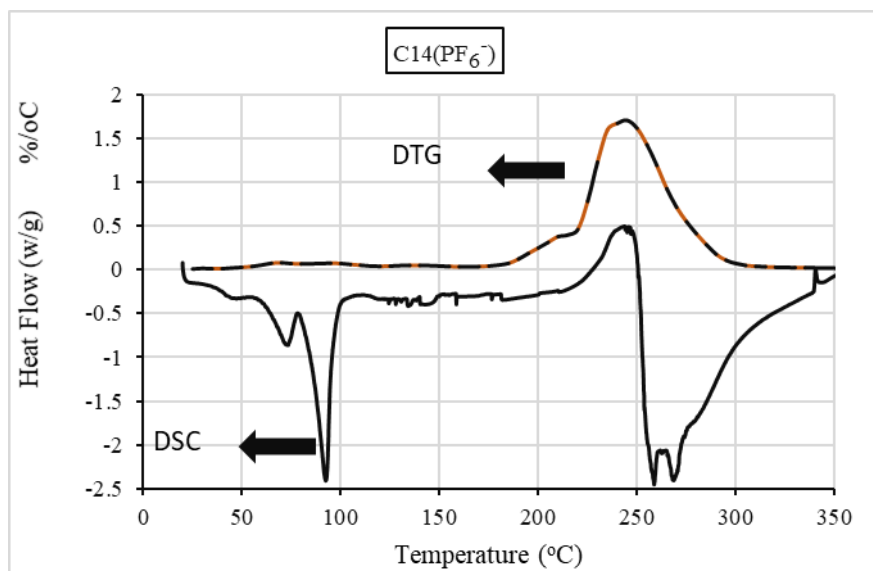

**Figure S121:** DTG/DSC curves of compound 28

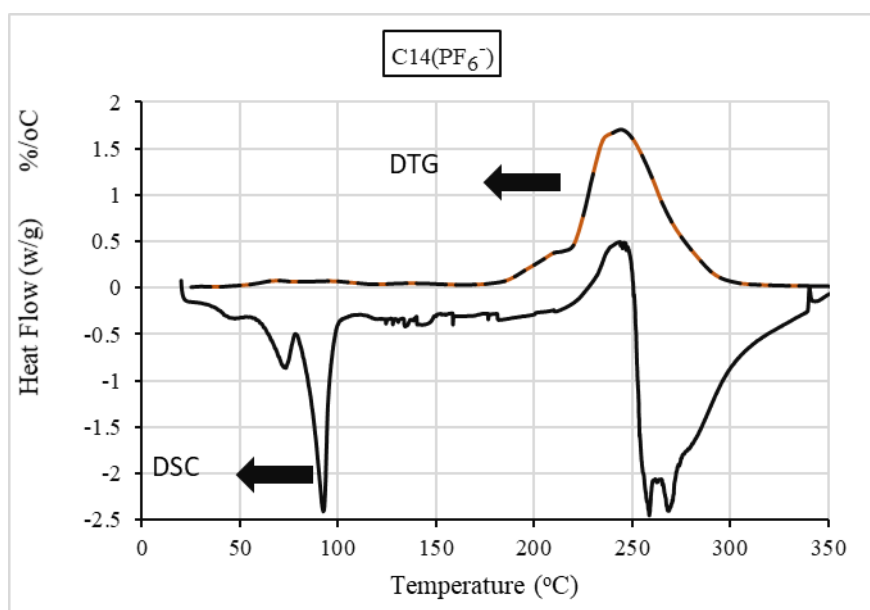

**Figure S122:** DTG/DSC curves of compound 29
